# 1 Disentangling seasonal introduction and 2 establishment risk of dengue in Africa

3  
4 **Authors:** Jenicca Poongavanan<sup>1</sup>, José Lourenço<sup>2,3</sup>, Joseph L.-H. Tsui<sup>4</sup>, Vittoria Colizza<sup>5,6</sup>, Yajna  
5 Ramphal<sup>1</sup>, Cheryl Baxter<sup>1</sup>, Moritz U.G. Kraemer<sup>4,7</sup>, Marcel Dunaïski<sup>8</sup>, Tulio de Oliveira<sup>1,9</sup>, Houriiyah  
6 Tegally<sup>1</sup>

7  
8 1 Centre for Epidemic Response and innovation (CERI), Stellenbosch University, Stellenbosch, South  
9 Africa

10 2 BioISI (Biosystems and Integrative Sciences Institute), University of Lisbon, Lisbon, Portugal AND  
11 3 Universidade Católica Portuguesa, Biomedical Research Center, Lisboa, Portugal

12 4 Department of Biology, University of Oxford, Oxford, UK

13 5 Sorbonne Université, INSERM, Institut Pierre Louis d'Epidemiologie et de Santé Publique (IPLESP),  
14 Paris, France

15 6 Department of Biology, Georgetown University, Washington, District of Columbia, USA

16 7 Pandemic Sciences Institute, University of Oxford, UK

17 8 Computer Science Division, Department of Mathematical Sciences, Stellenbosch University,  
18 Stellenbosch, South Africa

19 9 KwaZulu-Natal Research Innovation and Sequencing Platform (KRISP), University of KwaZulu-  
20 Natal, Durban, South Africa

21  
22 Corresponding authors: Houriiyah Tegally ([houriiyah@sun.ac.za](mailto:houriiyah@sun.ac.za)) and Tulio de Oliveira  
23 ([tulio@sun.ac.za](mailto:tulio@sun.ac.za))

24  
25 **Keywords:** Arboviruses, Dengue, Introductions, Mobility, Africa, Risk Flow

26  
27  
28  
29  
30  
31

## 32 Abstract

33 Background: The dengue virus is a significant global public health concern that poses a threat  
34 to Africa. Particularly, African countries are at risk of viral introductions through air travel  
35 connectivity with areas of South America and Asia that experience frequent explosive  
36 outbreaks. Limited reporting and diagnostic capacity hinder a comprehensive assessment of  
37 continent-wide transmission dynamics and deployment of surveillance strategies in Africa.

38

39 Methods: The risk of dengue introduction into Africa from countries of high incidence was  
40 estimated based on origin-destination air travel flows and epidemic activity at origin. We  
41 produced a novel proxy for local dengue epidemic activity using a composite index of  
42 theoretical climate-driven transmission potential and population density, which we used, along  
43 with travel information in a risk flow model, to estimate the importation risks.

44

45 Findings: We find that countries in east Africa face higher risk of importation from Asia,  
46 whereas for west African countries, larger risk of importation is estimated from South America.  
47 Some countries with high risk of importation experience low local transmission potential which  
48 likely hampers the chances that importations lead to local establishment and transmission.  
49 Conversely, Mauritius, Uganda, Ivory Coast, Senegal, and Kenya are identified as countries  
50 susceptible to dengue introductions during periods of persistent transmission suitability.

51

52 Interpretation: Our work improves the data driven allocation of surveillance resources, in  
53 regions of Africa that are at high risk of dengue introductions and establishment. This will be  
54 critical in detecting and managing imported cases and can improve local response to dengue  
55 outbreaks.

56

57 Funding: Rockefeller Foundation, National Institute of Health, EDCTP3 and Horizon Europe  
58 Research and Innovation, World Bank Group, Medical Research Foundation, Wellcome Trust,  
59 Google.org, Oxford Martin School Pandemic Genomics programme, John Fell Fund

60

61 **Research in context**

62 **Evidence before this study**

63 Despite the significant global burden of dengue virus globally, Africa remains relatively  
64 understudied due to limited reporting and diagnostic capabilities. We searched PubMed for  
65 articles in English published on and before May 6, 2024, that included “Dengue OR dengue”,  
66 “Africa”, and "importation OR imported". Few studies have investigated the introduction of  
67 dengue into African countries. Limited evidence includes phylogeographic studies describing  
68 a potential introduction of dengue from Brazil into Angola in 2013 and evidence of multiple  
69 historical introductions of dengue from Asia to Africa over several years. Before our study,  
70 none had employed a modelling framework to investigate the continental risks of importing  
71 dengue via viremic travellers into African countries from other regions of high dengue  
72 incidence.

73

74 **Added value of this study**

75 This study provides a novel approach to assessing the risk of dengue importation into Africa,  
76 integrating temperature-dependent transmission potential and air travel data. By identifying  
77 high-risk regions and highlighting the complex interplay between travel patterns, population  
78 density, and ecological factors, our findings enhance the understanding of dengue dynamics in  
79 Africa. This information enables targeted allocation of surveillance resources, improving  
80 preparedness and response to potential dengue outbreaks in susceptible regions.

81

82 **Implications of all the available evidence**

83 The integration of transmission potential as local epidemic activity and air travel data into a  
84 risk flow metric provides valuable insights into the risk of dengue importation into African  
85 airports from high-incidence countries. These findings have implications for tailored  
86 surveillance and prevention strategies in high-risk regions, facilitating early detection and  
87 management of potential dengue imported cases outbreaks in Africa.

88

## 89 Introduction

90 Dengue is an arthropod-borne virus with four main serotypes and is a member of the genus  
91 *Flavivirus* in the family *Flaviviridae* (1,2). It is thought to cause between 5.2 million and 390  
92 million infections around the world every year, mostly transmitted by *Aedes aegypti* and *Ae.*  
93 *albopictus* mosquitoes (3,4). Approximately half of the global human population is estimated  
94 to currently live in areas that are environmentally suitable for dengue transmission (3,5,6).  
95 Dengue is now endemic in more than 100 countries, with reported outbreaks predominantly in  
96 Central America, South America, and Southeast Asia, and has recently established epidemic  
97 cycles in parts of Africa and North America (6–8).

98

99 Despite the widespread distribution of mosquito vectors in Africa (9) and favourable  
100 transmission conditions characterised by high temperatures and increased urbanisation  
101 (7,10,11), severe gaps exist in our understanding of the transmission intensities of the virus on  
102 the continent. Limited diagnostic capacity and reporting on dengue incidence make it difficult  
103 to assess the true burden of dengue in Africa (3,5). Similarity of symptoms with other febrile  
104 illnesses such as malaria also play a role in underdiagnosis (12,13). Consensus of evidence  
105 studies have reported that dengue transmission is endemic in 34 countries in the African region  
106 (14,15). It is therefore speculated that dengue is more widespread in Africa than previously  
107 thought. In 2023 alone, 16 countries in Africa reported large dengue outbreaks (16).

108

109 Risk assessment for dengue in Africa has to consider several mechanisms of transmission.  
110 Given frequent explosive dengue outbreaks in South America and Asia, African countries are,  
111 for instance, at risk of constant viral introductions through air travel connectivity. Once  
112 introduced, dengue can theoretically spread rapidly in large parts of Africa due to the presence  
113 of suitable vectors, appropriate environmental conditions and limited population immunity.  
114 Even in countries where dengue is thought to be endemic, the risk of importing dengue genetic  
115 variants either from high incidence South American or Asian countries can exacerbate the  
116 burden of disease or seed new explosive outbreaks.

117

118 The potential for dengue importation into Africa via viremic travellers is a function of  
119 transmission in the origin country and the volume of travellers from the origin country to the  
120 destination country of interest. It is well documented that increased international travel and  
121 trade have facilitated dengue's global spread and mixing of viral serotypes and genotypes

122 (10,6,22,23). The influence of human mobility on pathogen spread has previously been  
123 characterised for influenza (24,25), zika (26) and more recently, and very extensively, for  
124 SARS-CoV-2 (27,28). Human mobility also plays a key role in shaping individuals'  
125 interactions with disease-carrying vectors and consequently affecting pathogen transmission  
126 (29,30). Understanding the combination of factors driving dengue introduction and onward  
127 transmission is crucial for effective surveillance, prevention, and control in Africa in the  
128 absence of antiviral treatment, underdiagnosis, and widespread vaccine cover. This study  
129 aimed to identify African airports at high risk of receiving dengue infected passengers. In doing  
130 so, it identifies potential high risk areas and optimal periods (at a monthly scale) during which  
131 to conduct enhanced disease surveillance.

## 132 Methods

### 133 2.1 Data

#### 134 2.1.1 Air Travel

135 The air travel flow data used in this study was obtained from the International Air Transport  
136 Association (IATA). It comprises the number of origin-destination passenger tickets and  
137 accounts for any connections at intermediate airports for the year 2019. We opted for the year  
138 2019 to reflect a recent customary year of travel preceding disruptions due to the COVID-19  
139 pandemic. The data comprises monthly passenger volumes from 14 high incidence countries  
140 (selection described further down) to 54 African countries, encompassing all commercial  
141 airports ( $n = 197$ ) in both the source and destination regions.

#### 142 2.1.2 Transmission Potential Estimate

143 We sourced spatio-temporal estimates of climate-based transmission potential of dengue  
144 (referred to as index P) developed and made accessible by estimates from Nakase et al. (2023;  
145 <https://doi.org/10.6084/m9.figshare.21502614>). The index used in this study quantifies the  
146 transmission capacity of a single adult female mosquito throughout its lifetime in a completely  
147 susceptible host population, incorporating factors such as infectious periods and oviposition.  
148 The metric was validated with regional dengue data from Brazil and Thailand. The index P  
149 metric utilises local temperature and humidity time series (spatial pixel resolution used was

150  $0.25^\circ \times 0.25^\circ$  (~28 km<sup>2</sup>) ) as primary inputs, which enables its application to any location with  
151 available climate data.

152

153 We post-processes the raw estimates to define *persistence suitability* as the time period where  
154 environmental conditions exceed a predetermined threshold deemed favourable for dengue  
155 transmission. An index P threshold of 1.0 was selected as it is directly comparable with the  
156 basic reproduction rate. A value of 1.0 means that within a population where the average  
157 number of adult female mosquitoes per host is 1.0, interpreted as a reproduction number of 1.  
158 Periods of persistence suitability are then defined as the months where transmission potential  
159 was > 1.0.

### 160 2.1.3 Population Density

161 Population density at a given location significantly influences dengue transmission due to its  
162 role in determining the availability of human hosts for the virus. To integrate population density  
163 into the risk metric, we extracted population densities of each district within countries from the  
164 Gridded population of the World, using administrative (level 1) boundary data from the GADM  
165 database (31). To calculate the population density of a province, we aggregated the population  
166 density values of grid cells intersecting the province boundary. This total population was then  
167 divided by the sum of the areas of these grid cells, providing a representation of the province's  
168 population density.

## 169 2.2 Transmission potential as a proxy for case counts

170 To address the challenge of obtaining dengue case data with sufficient spatial and temporal  
171 resolution, we explored the possibility of using transmission potential (index P) as a proxy. To  
172 assess the viability of replacing dengue case data with transmission potential, we conducted a  
173 preliminary correlation test between transmission potential and monthly dengue cases for  
174 countries in which we were able to obtain monthly dengue case data (see supplementary figure  
175 S1). Moreover, using transmission potential instead of case data would allow for a more fine  
176 scale understanding of dengue activity in a country, surpassing the resolution typically  
177 available at the national level.

178

179 For this study, we considered countries with large outbreaks of dengue in 2019 as flagged by  
180 the European Centre for Disease Prevention and Control (ECDC) (accessed on 10th May 2023;

181 <https://www.ecdc.europa.eu/en/dengue>). These were predominantly in Latin America and  
182 Asia. Monthly dengue case data from these countries were then extracted from public health  
183 organisations such as the Pan American Health Organisation (PAHO; [www3.paho.org](http://www3.paho.org)), from  
184 governmental health reports or bulletins and from statistical bureau websites (governmental  
185 reporting websites, WHO reports, etc). The inclusion criteria for countries of high dengue  
186 incidence used in this study was based on the availability of monthly case data in 2019 as it  
187 allowed for reliable testing of the transmission potential proxy. This resulted in a final selection  
188 of 14 countries of high dengue incidence in Latin America and Asia, namely: Brazil, Bolivia,  
189 Peru, Sri Lanka, Vietnam, Malaysia, Columbia, Thailand, Nicaragua, India, Bangladesh,  
190 Cambodia, Singapore and Belize. We also extracted province-level case data where openly  
191 available. In the correlation coefficient computation we also incorporated data from two  
192 African countries, Burkina Faso and Mauritius, for which monthly data for the year 2019 were  
193 available.

194

195 We use the Spearman's Rank correlation coefficient to examine the relationship between  
196 transmission potential and monthly dengue case counts for 16 countries. Following the  
197 methodology used by Nakase et al., (2023), we computed correlation strengths between case  
198 counts and transmission potential with various month lags (month+0, month+1 and month +2).  
199 We find (see appendix figure S1) a significant positive correlation between transmission  
200 potential and dengue cases for most countries, with the highest association at a lag of one month  
201 (12 out of 16 countries). The strength of the association ranged from -0.204 to 0.954. For some  
202 countries ( $n = 3$ ), we found a weak correlation which could be caused by several factors, such  
203 as: i) limited case data obscuring seasonal patterns, which results in poor alignment with the  
204 index, ii) the national-level index failing to accurately reflect the overall case distribution if  
205 cases are concentrated in specific regions.

206

207 While the transmission potential index serves as a valuable indicator of dengue risk in a given  
208 region, its standalone consideration is insufficient. Additional factors must be taken into  
209 account, including the presence and abundance of mosquito vectors, population density in the  
210 area, and various environmental factors that may influence the spatial distribution of vectors.  
211 In this study, we address one of these conditions by incorporating population density alongside  
212 the transmission potential index. We define a composite index ( $t$ ):

213

214 
$$t_i = \text{Transmission Potential (state } i) * \text{Population Density (state } i)$$

215 which captures the combined influence of the transmission potential and the population density  
216 at the district level, by multiplying both elements (see supplementary figure S2). With our  
217 chosen approach, we managed to overcome some data constraints especially in view of dengue  
218 case numbers, which might have otherwise impacted our results.

219

220

## 221 2.3 Risk Flow Metric

222 The importation risk to each airport (destination) in each African country was estimated as the  
223 probability of importing a case from each state (origin) within each country of high incidence,  
224 accounting for the origin–destination travel flows originated from such countries and for their  
225 different transmission potential from the originating states. For cross-country comparisons, we  
226 aggregated the resulting risk of introduction from each airport to the country level and for  
227 visualisation purposes we calculated the average risk across each airport over the 12-month  
228 period (January - December 2019).

229

230 The methodology was adapted from Gilbert et al. (2020) and is as follows:

231 Risk flow ( $r_{i\alpha}$ ) from origin state  $i$  to destination airport  $\alpha$  is calculated by:

$$r_{i\alpha} = \frac{t_i n_i A_{i\alpha}}{\sum_j t_j n_j}$$

232

233 where  $t_i$  is the combined transmission potential and population density of state  $i$ ,  $n_i$  is the  
234 travel flux from the origin state  $i$ ,  $A_{i\alpha}$  is the probability of a traveller flying from  $i$  to  $\alpha$ ,  
235 conditioned on travelling internationally from  $i$  (by construction,  $\sum_\alpha A_{i\alpha} = 1$ ). The denominator  
236 accounts for the transmission potential in various states and the potential risk associated with  
237 travellers from different origin states. It is constructed as the sum product of all transmission  
238 potentials and travel flows originating from each individual state (denoted by  $j$ ). This  
239 normalisation process ensures that the impact of each state's transmission potential and travel  
240 flow is proportionally represented in relation to the collective risk from all origin states.

241

242 The total risk of case importation to destination  $\alpha$  is then given by



$$R_{\alpha} = \sum_i r_{i\alpha}$$

243

244 This risk is normalised such that  $\sum_{\alpha} R_{\alpha} = 1$ .

245

246 To summarise and compare the overall introduction risks of dengue into African countries from  
247 high incidence countries in Asia and South America, we aggregated the risk originating from  
248 Asia and South America separately by summing it across all airports to the district level and  
249 then calculating the average value over all months. We then computed the proportions of risk  
250 coming from Asia and South America for each district. Additionally, in aggregating the risk  
251 for destination countries, we conducted a secondary computation of risk emphasising the  
252 locations characterised by persistence suitability (see section 2.1.2). This was done by  
253 excluding any estimate of risk that occurred outside of times of persistence suitability (i.e.  
254 index  $P < 1$ ) in respective destination locations. In other words, we filter only for estimated  
255 risks that are most likely to lead to onward transmission and local outbreaks. We term this  
256 introduction suitability while we term the risk based on the non-filtered values the raw  
257 introduction risk.

## 258 Results

259 **Dengue introduction risks from high incidence Asian and South American countries into Africa**  
260 Several countries in Africa are estimated to have high transmission suitability for dengue and  
261 simultaneously high population density, indicating elevated potential for local transmission  
262 following viral introductions (Supplementary Figure S3). At the same time, certain countries  
263 on the continent are receiving variable, and sometimes high volumes of international  
264 passengers from various Asian and South American countries (Supplementary Figure S4). In  
265 2019, over 504 million travellers entered the African continent from the 14 high-incidence  
266 countries. Of the total number of travellers, 39% originated from Southeast Asia, 34% from  
267 South Asia and 27% from South America (Supplementary Figure S4). The months with the  
268 highest travel volume entering the African continent from these places were November,  
269 December, and January.

270

271 The risk flow of dengue from countries with high incidence rates, from Asia and South America  
272 show that South Africa and Egypt were the countries at higher risk of dengue importation

273 followed by Kenya, Angola, Morocco, Seychelles and Mauritius (Figure 1). Egypt is exposed  
274 to significant risk primarily originating from Asia, specifically its biggest risk coming from  
275 Malaysia. Kenya, Mauritius, Tanzania, and Uganda exhibit an elevated risk of introduction  
276 from India. Risks from Singapore were also high, especially towards Mauritius, South Africa  
277 and Egypt. Risks from Vietnam are relatively low across the entire continent, with the most  
278 significant potential impact observed in South Africa and Angola. Additionally, Morocco and  
279 Nigeria are identified as regions with a considerable risk of disease introduction from  
280 Nicaragua.

281  
282 The results reveal a general trend that countries in the southern and eastern African region are  
283 faced with higher risks of dengue importation from Asia, whereas central, western and a portion  
284 of northern African countries face higher risk of introduction from South America. South  
285 Africa is seen to receive large introduction risks from both origin regions. When considering  
286 the raw risks of introductions overlaid onto the local transmission suitability index across  
287 Africa, it becomes clear that high risk of introduction is not necessarily linked to high  
288 transmission suitability. For instance, the high risks of introduction into South Africa do not  
289 necessarily translate to transmission locally due to very low dengue transmission suitability.  
290 We explore this further in the following sections.

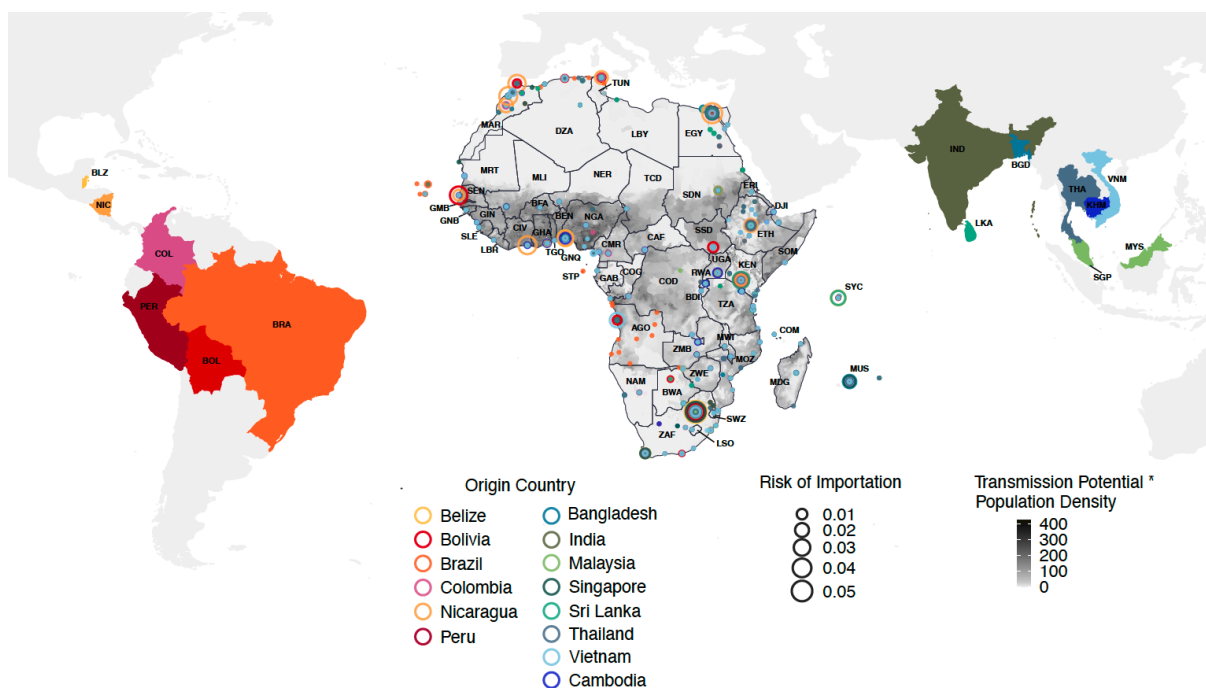

291  
292 **Figure 1. Mean risk of dengue introduction into African countries in 2019 from 14**  
293 **countries in Asia and Latin America.** The risk of dengue introduction into African countries  
294 from 14 origin countries in Asia and Latin America is represented by circles on the African

295 continent. The size of the circles represent the size of the risk averaged over the 12 months for  
296 each airport in Africa. The colour of the circles represents the country from which the risk is  
297 coming from and the fill colour of those countries are consistently matched. The fill colour of  
298 the African continent represents the index of transmission potential multiplied by population  
299 density to highlight the hotspots of high transmission at the destination.

300

301

### 302 **Spatiotemporal variation in risks of introduction and local transmission suitability**

303 In addition to quantifying the risk of dengue introductions from countries of high incidence  
304 from Asia and South America we evaluate the timing of these introductions and whether they  
305 arrive at periods of high local transmission suitability in Africa. We do so by mapping the  
306 monthly introduction risk to transmission potential at the airport level in Africa. Egypt is  
307 estimated to be at high risk of dengue introduction during the second half of the year from both  
308 Asia and South America (Figure 2). This temporal pattern aligns with a concurrent period of  
309 heightened transmission potential within the country, which could indicate a higher likelihood  
310 of viral introductions leading to onward transmission. In fact in 2023, Egypt experienced quite  
311 a big dengue outbreak around September to November (33), which coincides with peaks in risk  
312 and transmission potential. Angola and Ethiopia both are estimated to have a continuous risk  
313 of disease introduction from Asia throughout the year. However, in Angola, the transmission  
314 potential is predicted to decline during the months of July, August, and September. Mauritius  
315 is also estimated to be at high risk of introduction from Asia during the early part of the year,  
316 again coinciding with a period of high transmission potential. On the other hand, we observe  
317 high risks of dengue introduction into South Africa but, in general, the country exhibits a low  
318 transmission potential throughout the year, indicating these potential introductions as likely  
319 impasses for transmission. In Nigeria, the majority of the high risk of introduction from South  
320 America are estimated to occur during periods of lower local transmission suitability. The  
321 temporal analysis of estimated importation risks and local transmission potential reveal the  
322 optimal times to conduct increased surveillance, as the times when the risks of introduction and  
323 the potential for transmission are simultaneously high. Therefore, the temporal synchrony  
324 between estimated introduction risks and transmission suitability has important implications  
325 for which viral introductions are predicted to have the ability to contribute to local outbreak  
326 risks.

327

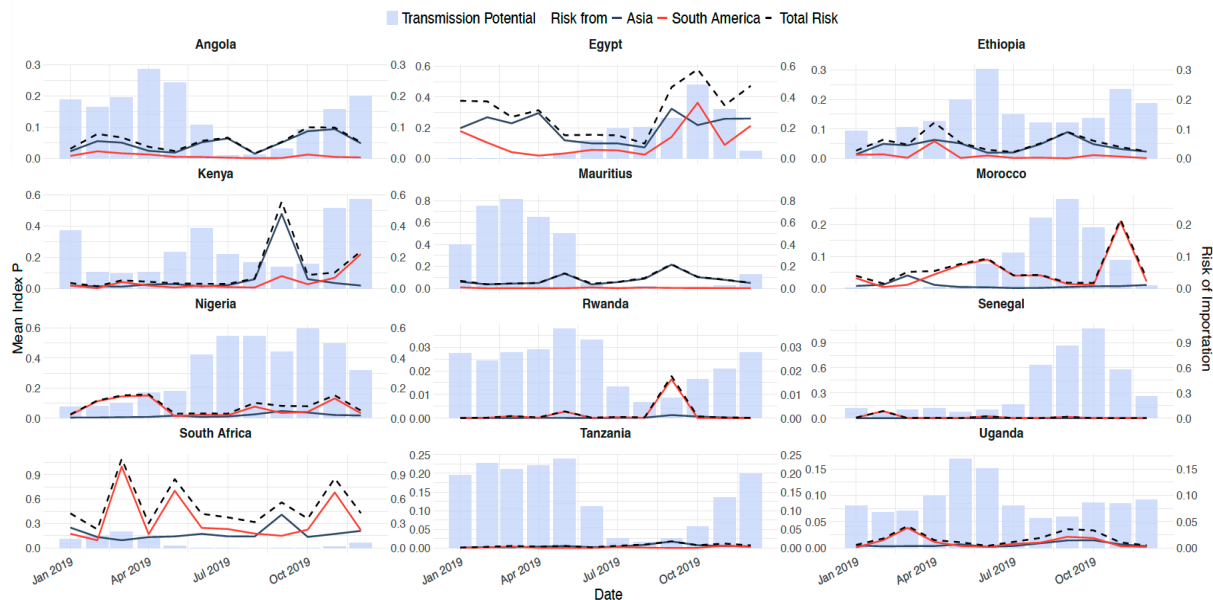

328

329 **Figure 2. Time-varying risk of introduction into selected African countries in 2019.** The  
 330 blue and red lines represent the risk of importation from Asia and South America respectively  
 331 and the dotted line represents the total risk of importation from both continents across the year.  
 332 The risk of importation was aggregated at the national level by summing the individual risks  
 333 from all airports within each African destination country. The blue bars represent the time-  
 334 varying transmission potential index. Here, we demonstrate countries that had the most  
 335 synchronicity between transmission potential and risk of introduction - see supplementary S5  
 336 for additional countries.

337

338

### 339 Overall introduction suitability in Africa

340 We then filtered for risk estimates that are most likely to lead to onward transmission:  
 341 introduction suitability risk, that is, risks that occur during periods of persistence suitability.  
 342 Figure 3A illustrates the aggregated raw risk of dengue introduction throughout the year 2019  
 343 across individual provinces or districts (administrative level 1) within each African country,  
 344 and aggregated as originating either from Latin America or Asia. Conversely, Figure 3B  
 345 presents the aggregated introduction suitability of dengue into Africa. Notably, in South Africa,  
 346 where the transmission potential remains consistently below 1 throughout the year, the risk of  
 347 dengue evolving into an outbreak from an introduction is negligible.

348

349 In our analysis, a noteworthy shift in risk proportionality emerged when focusing on  
 350 introduction suitability compared to raw risk. For example, in the case of the Democratic

351 Republic of the Congo (DRC), initially, 73.83% of the total risk was attributed to Asian regions.  
 352 However, when looking at periods of persistence suitability for the DRC, the risk distribution  
 353 shifted and the proportion of risk attributed to Asia, rose to 98.19% relative to South America.  
 354 This outcome underlines the importance of understanding not only the geographic origin of  
 355 introduction risks but also the specific temporal and spatial context in which these risks are  
 356 introduced.  
 357

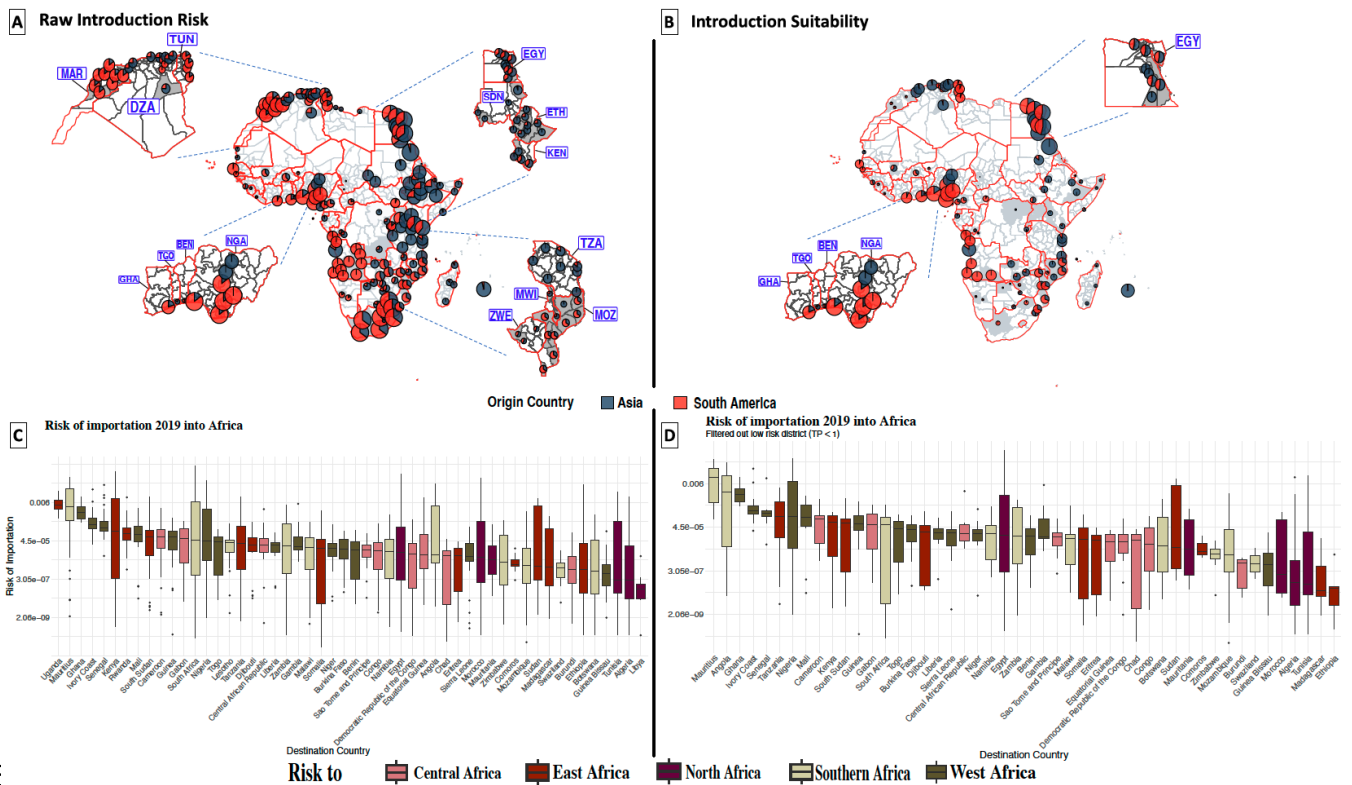

358  
 359  
 360 **Figure 3: Overall proportional risk of importation into African countries before and after**  
 361 **adjusting for period of persistence suitability (transmission potential greater than 1).** A) The  
 362 proportion of risk from Asia and South America throughout the year for each district. The size of the  
 363 pie charts are proportional to mean risk of importation across the year and the coloured pies represent  
 364 the origin continent. We zoomed in on specific countries within the plot, namely: Ghana, Togo, Benin,  
 365 Nigeria, Mozambique, Tanzania, Zimbabwe, Malawi, Morocco, Tunisia, Algeria, Egypt, Sudan,  
 366 Ethiopia, and Kenya. B) The proportion of risk from Asia and South America across the year, for  
 367 months with high persistence suitability. We zoomed in on specific countries within the plot, namely:  
 368 Ghana, Togo, Benin, Nigeria and Egypt. C) Boxplot displaying risk across months and districts for each  
 369 African country, colour-coded by their respective African region. D) Boxplot of risk across months and  
 370 districts with high persistence suitability.

## 371 Discussion

372 In this study, we investigated the temporal and spatial intersections of high risks of introduction  
373 and heightened transmission potential of dengue in African countries. The exploration of  
374 dengue introduction into Africa is imperative due to the potential implications for onward  
375 transmission. To this end, we constructed an importation suitability map to depict the spatial  
376 and temporal hotspots of dengue introduction and establishment into Africa from high  
377 incidence countries in Asia and Latin America.

378  
379 We identified that the heterogeneity of the risk across Africa is dependent on the distribution  
380 of dengue activity across different provinces or states in the countries of high incidence and  
381 their connection to airports in Africa (see supplementary figure S6). Further, we found that  
382 seasonal variation plays a crucial role. For example, in India, major outbreaks tend to occur  
383 after the monsoon season and thus have a higher transmission potential during these seasons  
384 (For example, the main monsoon season spans from June to September) (34–36) and thus we  
385 also observe a higher risk of dengue importation from India to African countries following the  
386 monsoon season (see supplementary figure S6).

387  
388 This research presents an alternative risk assessment by considering modelled dengue  
389 transmission potential (7) rather than reported incidence, compared to other studies using case  
390 incidence which might suffer from substantially underreporting (37–40). The correlation  
391 analyses revealed a robust association between transmission potential and dengue cases for  
392 countries where high resolution spatiotemporal case records were available, with a significant  
393 correlation observed at a one-month lag (see supplementary figure S1). Our findings are  
394 consistent with previous research, demonstrating that 96% of municipalities in Brazil and 95%  
395 of provinces in Thailand exhibited incidence dynamics with 0-3 months time delays with  
396 estimated transmission potential (7). Our correlation further supports the utility of using  
397 transmission potential as a proxy for local dengue circulation.

398  
399 Increased international travel and trade have facilitated the global spread of dengue from  
400 endemic to non-endemic regions, by enabling the movement of infected individuals and  
401 mosquito vectors between regions (Gubler, 2011; Murray et al., 2013; Nakase et al., 2023;  
402 Yang et al., 2021). The risk flow results highlight the substantial risks of dengue introduction  
403 into certain parts of the African continent from Asia and South America through human

404 mobility. We show that the risk of importation to African countries is highly heterogeneous.  
405 The results produced by our model suggest that major airports in South Africa, Egypt,  
406 Morocco, Kenya, Seychelles and Mauritius, are potential hotspots for the importation of  
407 dengue-infected travellers from high-incidence countries. However, the analysis also revealed  
408 important geographical nuances: for example, the broader Southern and Eastern African  
409 regions are confronted with elevated risks of dengue importation from Asia, while Central,  
410 Western, and a segment of Northern African nations are more susceptible to introductions from  
411 South America. This is consistent with a recent phylogeographic study which found that all  
412 four dengue serotypes were introduced on multiple occasions to Africa, primarily from  
413 southern or Southeast Asia since the 1940s (41). This highlights the significance of our study  
414 in obtaining high-resolution and recent temporal and spatial trends for the vulnerability of  
415 Africa to dengue introductions.

416  
417 To translate the high risks of introduction into the notion of introduction suitability, that is  
418 considering potential introductions that are only highly likely to cause onward transmission in  
419 the destination countries, it was important to understand the specific temporal and spatial  
420 patterns of the risk flow estimates. Angola and Mauritius were identified as being at high-risk  
421 of suitable introductions, given that inferred introductions peaked during periods of heightened  
422 transmission potential within those countries (Fig 2). When considering introductions that  
423 happen during times of high persistence suitability, we notice high risk of introduction into  
424 West and North Africa (Fig 3B).

425  
426 Epidemiological and genomic surveillance are critical public health measures to mitigate  
427 disease burden, and also to understand the spread and evolution of pathogens. For dengue,  
428 molecular surveillance also allows public officials to monitor the circulating serotypes while  
429 remaining vigilant for the emergence of novel strains or genotypes. At present, there is no  
430 approved antiviral treatment for dengue and supportive care is the only option (17–19).  
431 However, two dengue vaccines have shown great promise (Takeda and Butantan vaccines)  
432 (20). Genomic surveillance can also provide critical information about viral transmission  
433 landscape prior to upcoming dengue vaccine rollouts. To determine the optimal locations for  
434 conducting genomic surveillance in Africa, it is also important to have a quantitative  
435 understanding of the actual risk of a dengue virus epidemic at country level, particularly given  
436 limited resources to implement surveillance programs. This study's findings point to the fact  
437 that emphasis should be placed on targeted monitoring during periods when the likelihood of

438 risks escalating into an outbreak is higher, and within areas prone to introductions during time  
439 of persistence suitability.

440

441 This study should be interpreted in light of several limitations. First, our analysis focuses on  
442 the risk of viral movement from high-incidence countries in South America and Asia to African  
443 countries, and does not model the potential movement of dengue between African nations,  
444 which would also have been dependent on road travel networks. This is an avenue for further  
445 exploration especially between highly connected neighbouring countries with known dengue  
446 circulation (for example, Burkina Faso and Senegal). Additionally, the measure of transmission  
447 potential used for the source locations does not account for specific control measures in place,  
448 potentially impacting the accuracy of the estimated dengue incidence. It also does not take into  
449 account the presence and abundance of mosquito vectors. Despite this limitation, the chosen  
450 transmission potential index  $P$  seems to produce realistic estimates for dengue incidence in  
451 source locations, considering variations in testing and reporting practices globally. Thirdly,  
452 while our findings are founded upon the current travel networks, it is imperative to  
453 acknowledge the dynamic nature of travel patterns. Given the expansive reach of air travel and  
454 the transformative impact observed during the COVID-19 pandemic, we must remain vigilant  
455 to the possibility of shifts in dengue introduction risks. This is particularly relevant as more  
456 areas are becoming suitable for transmission of dengue.

457

458 In conclusion, this study provides valuable insights into the complex dynamics of dengue  
459 importation risks into Africa. The incorporation of estimated transmission suitability for  
460 dengue and population density in risk assessments enhances the accuracy of predictions. The  
461 temporal and spatial analyses highlight specific regions and times that warrant intensified  
462 surveillance and public health interventions given the likelihood of potential introductions to  
463 lead to outbreaks. These findings contribute to a more nuanced understanding of global dengue  
464 dynamics, and importantly focus on informing further surveillance on the Africa continent.

## 465 Data Availability Statement

466 Proprietary air travel data are commercially available from the International Air Transport  
467 Association (<https://www.iata.org/>) databases. Transmission potential (index  $P$ ) estimates are  
468 available at <https://doi.org/10.6084/m9.figshare.21502614>. Risk estimates computed from this  
469 study can be found at:



470 [https://github.com/CERI-KRISP/Dengue\\_Importation\\_Risk\\_Modelling.git](https://github.com/CERI-KRISP/Dengue_Importation_Risk_Modelling.git)

471

## 472 Acknowledgements

473 CERI and KRISP are supported in part by grants from the Rockefeller Foundation (HTH 017),  
474 the National Institute of Health USA (U01 AI151698) for the United World Antivirus Research  
475 Network (UWARN), and the INFORM Africa project through IHVN (U54 TW012041), the  
476 European Union supported by the Global Health EDCTP3 Joint Undertaking and its members,  
477 European Union's Horizon Europe Research and Innovation Programme (101046041), the  
478 Health Emergency Preparedness and Response Umbrella Program (HEPR Program), managed  
479 by the World Bank Group (TF0B8412), the Medical Research Foundation (MRF-RG-ICCH-  
480 2022-100069), and the Wellcome Trust (228186/Z/23/Z). M.U.G.K. acknowledges funding  
481 from The Rockefeller Foundation, Google.org, the Oxford Martin School Pandemic Genomics  
482 programme, European Union's Horizon Europe programme projects MOOD (#874850) (also  
483 V.C.) and E4Warning (#101086640), the John Fell Fund, a Branco Weiss Fellowship and  
484 Wellcome Trust grants 225288/Z/22/Z, 226052/Z/22/Z & 228186/Z/23/Z, United Kingdom  
485 Research and Innovation (#APP8583) and the Medical Research Foundation (MRF-RG-ICCH-  
486 2022-100069). The content and findings reported herein are the sole deduction, view and  
487 responsibility of the researcher/s and do not reflect the official position and sentiments of the  
488 funding agencies.

489

490

491

492

493

494

495 Supplementary Figures

496 Figure S1

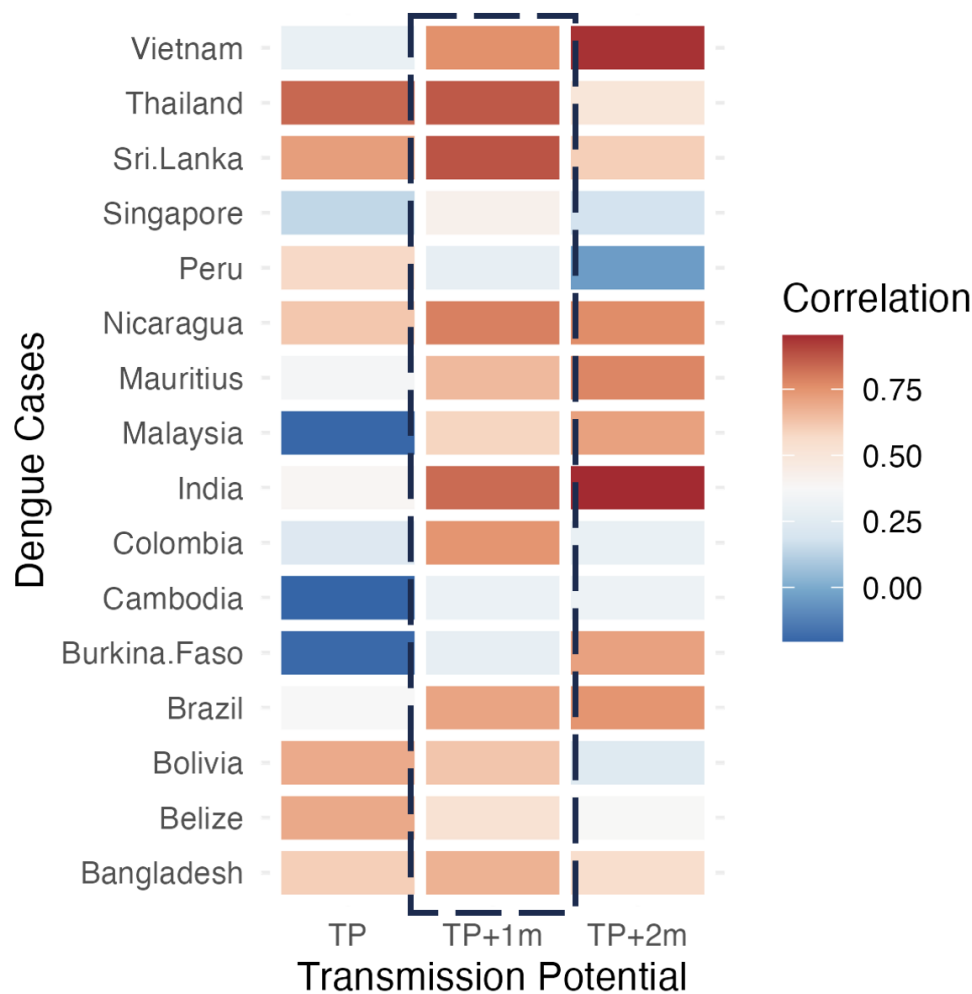

497

498

499 Figure S1: Temporal correlation between monthly dengue cases from different origin countries to  
500 Transmission potential without and with 1 and 2 months lag.

501

502

503 Figure S2

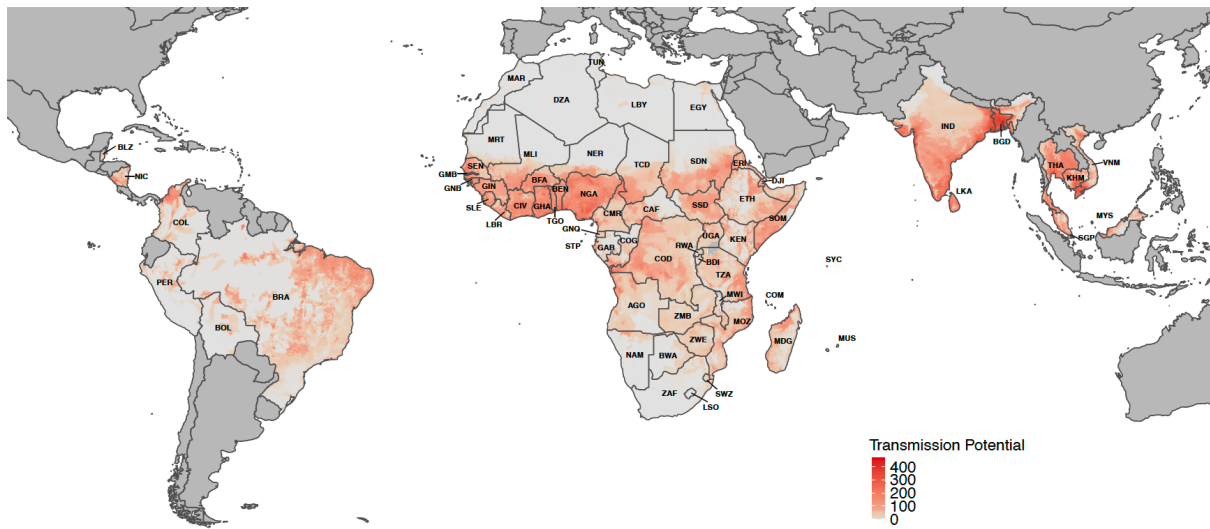

504  
505 Fig S2: The figure shows the composite index of Transmission Potential multiplied by Population  
506 Density ( $t_i$ ), used in this study. Here we only show for the 14 countries of high incidence and the  
507 African continent, i.e., only for the origin and destination countries used in this study.  
508

509 Figure S3

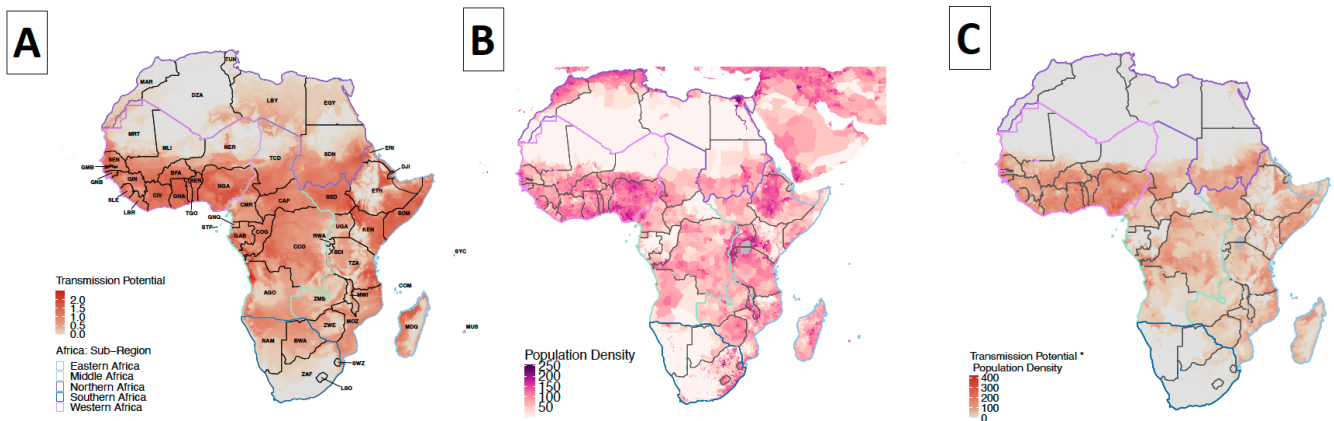

511  
512 Fig S3: A) The map background uniformly represents the transmission potential of dengue  
513 (mean index P) across Africa, with the continent divided into five distinct regions. B) The  
514 population density across Africa and C) Transmission potential multiplied by population  
515 density for Africa. We also divide the African continent into 5 regions: Eastern (light blue),  
516 Middle (Green), Northern (Purple), Southern (dark blue) and Western Africa (pink) which are  
517 outlined on the map.  
518

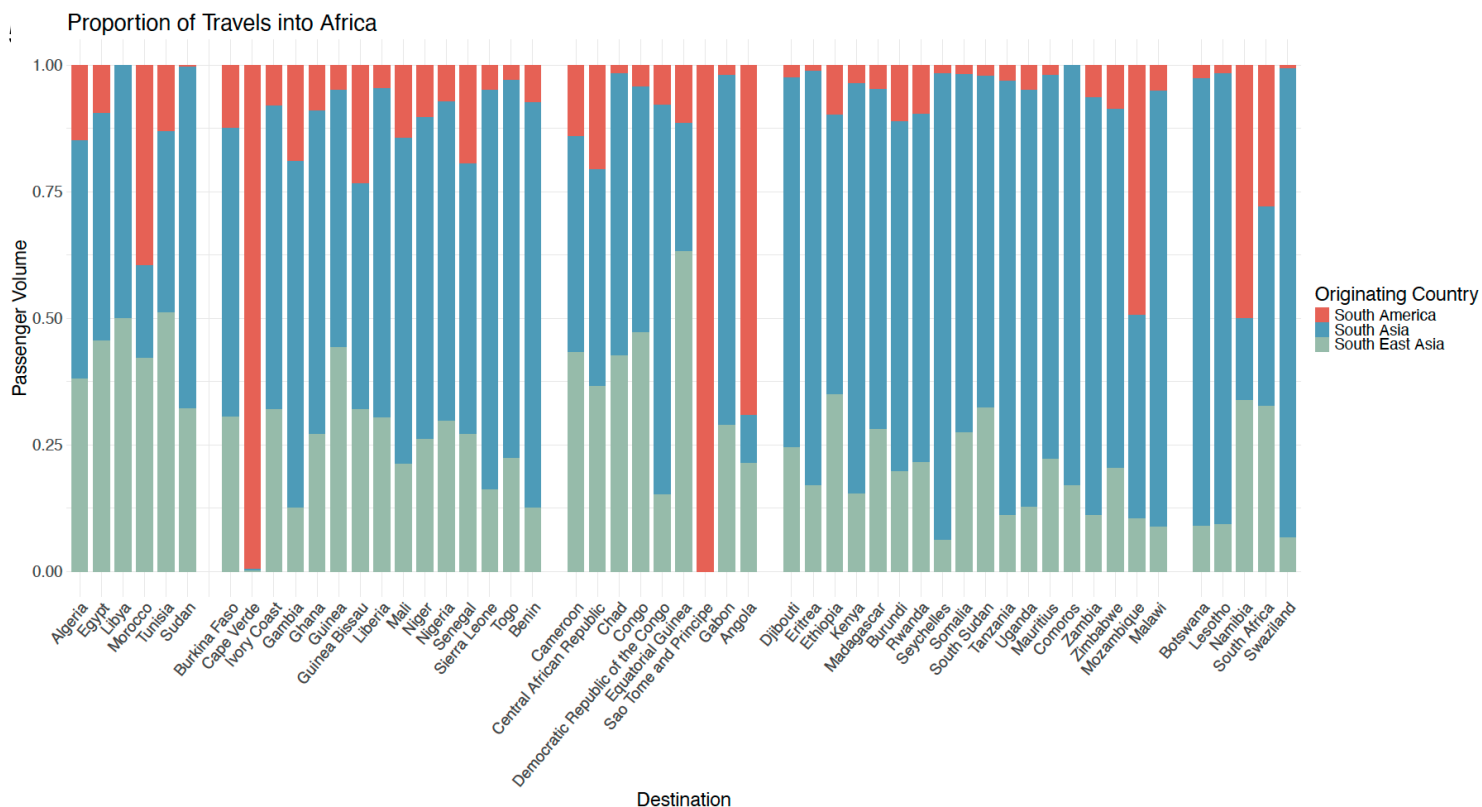

520

521 Fig S4: This figure depicts the proportion of travel volumes from Asia, Southeast Asia, and South  
 522 America to African countries over the course of one year.

523

524

525 Figure S5

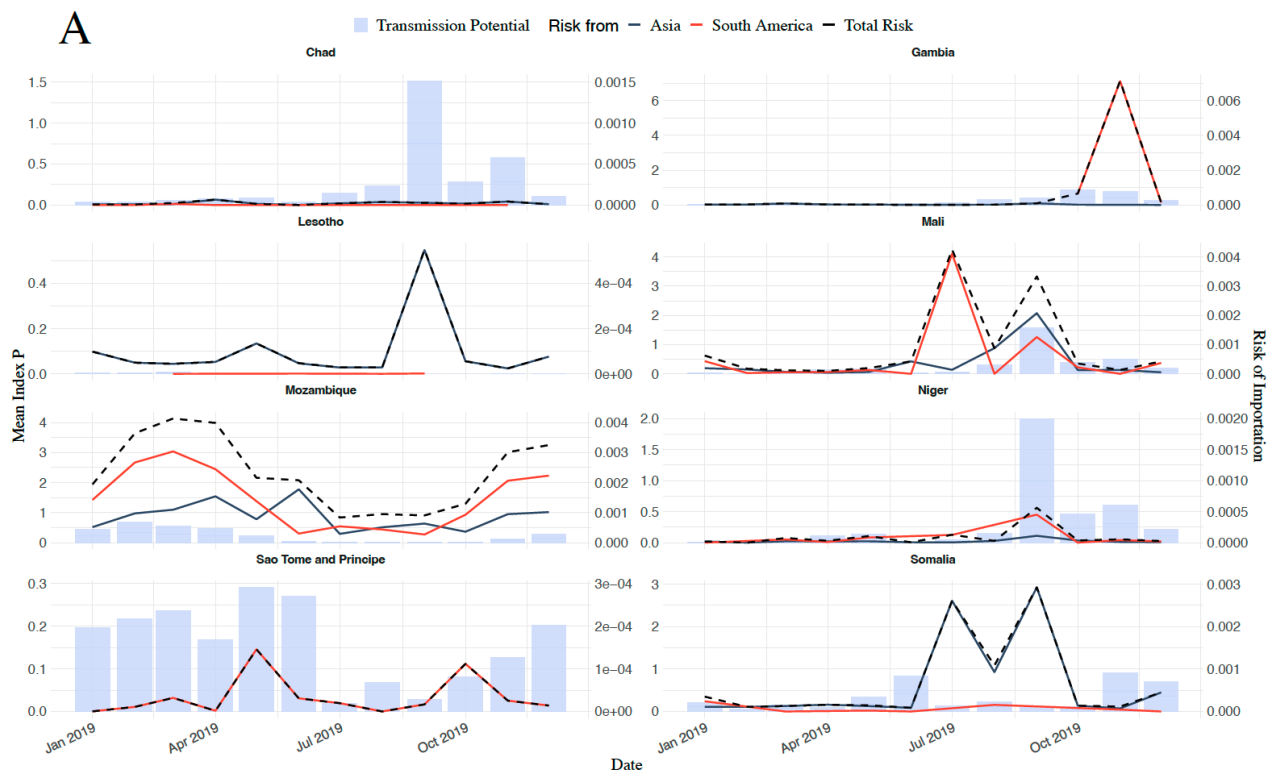

526  
527

**B**

■ Transmission Potential Risk from — Asia — South America — Total Risk

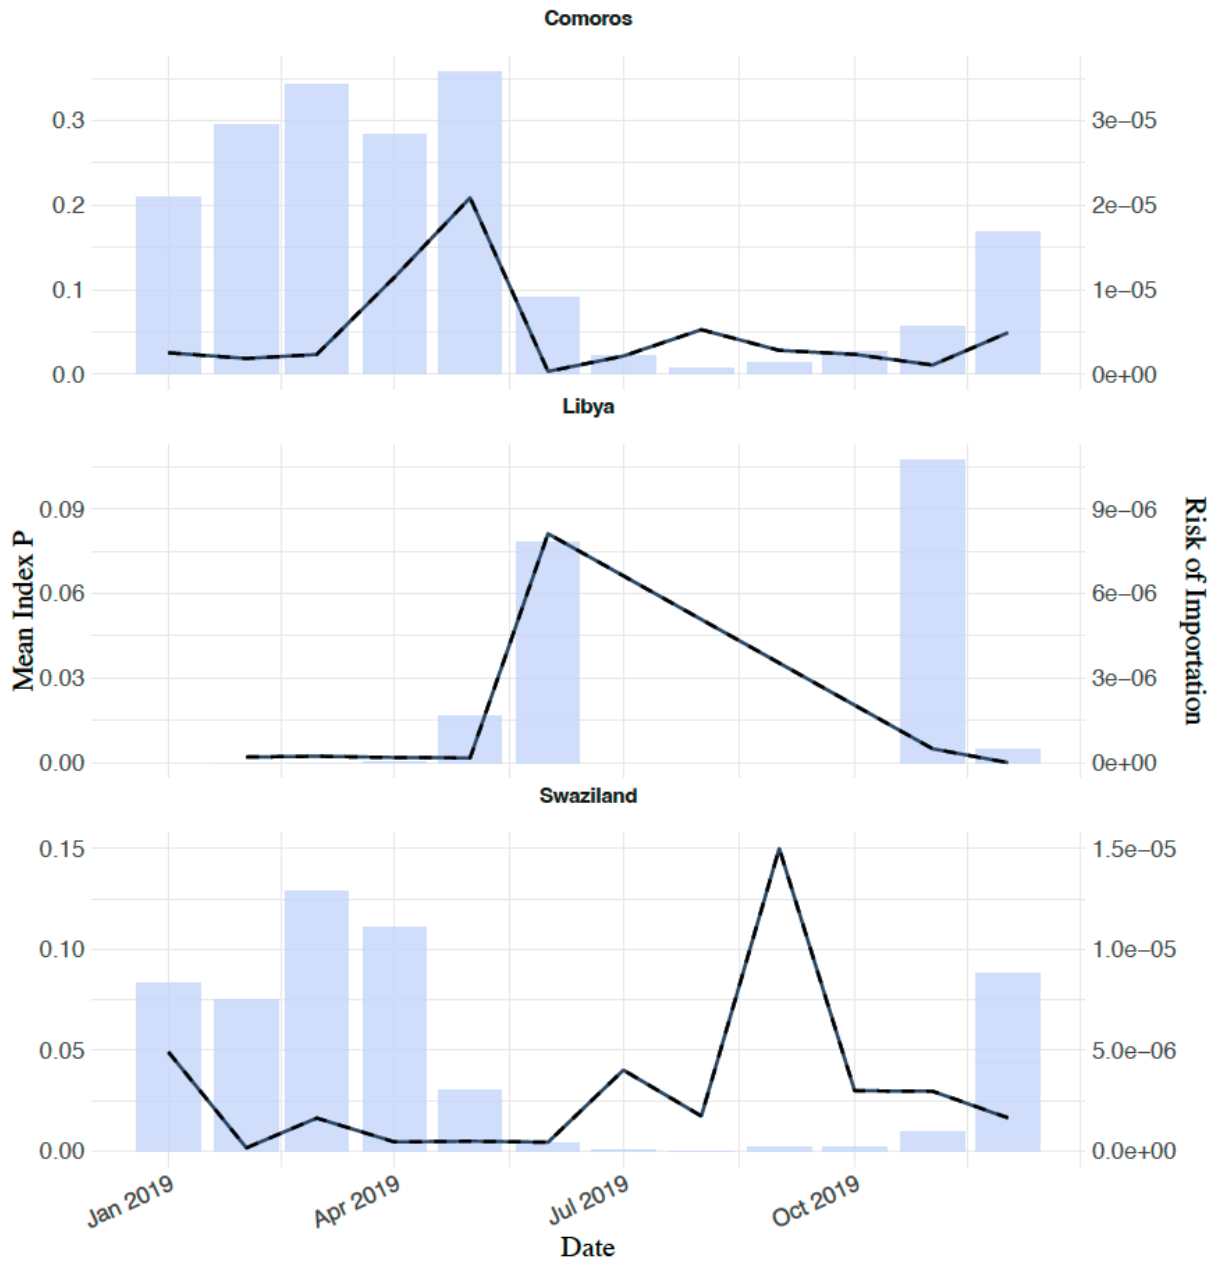

528  
529  
530  
531  
532  
533  
534  
535

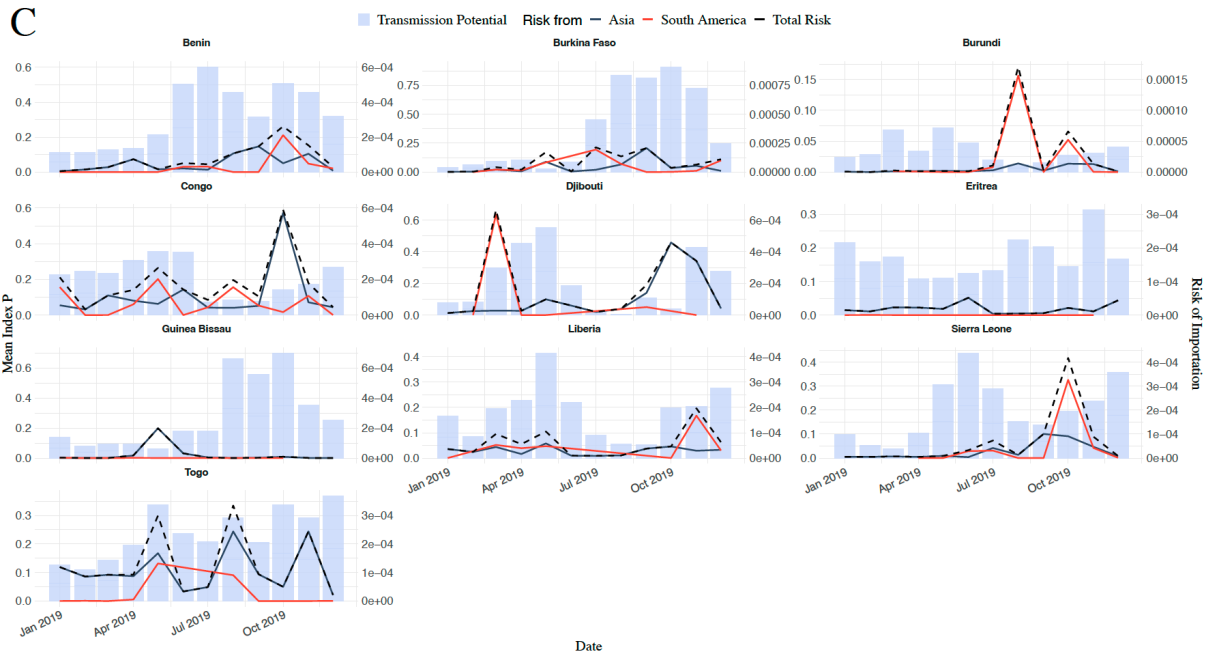

536  
537  
538

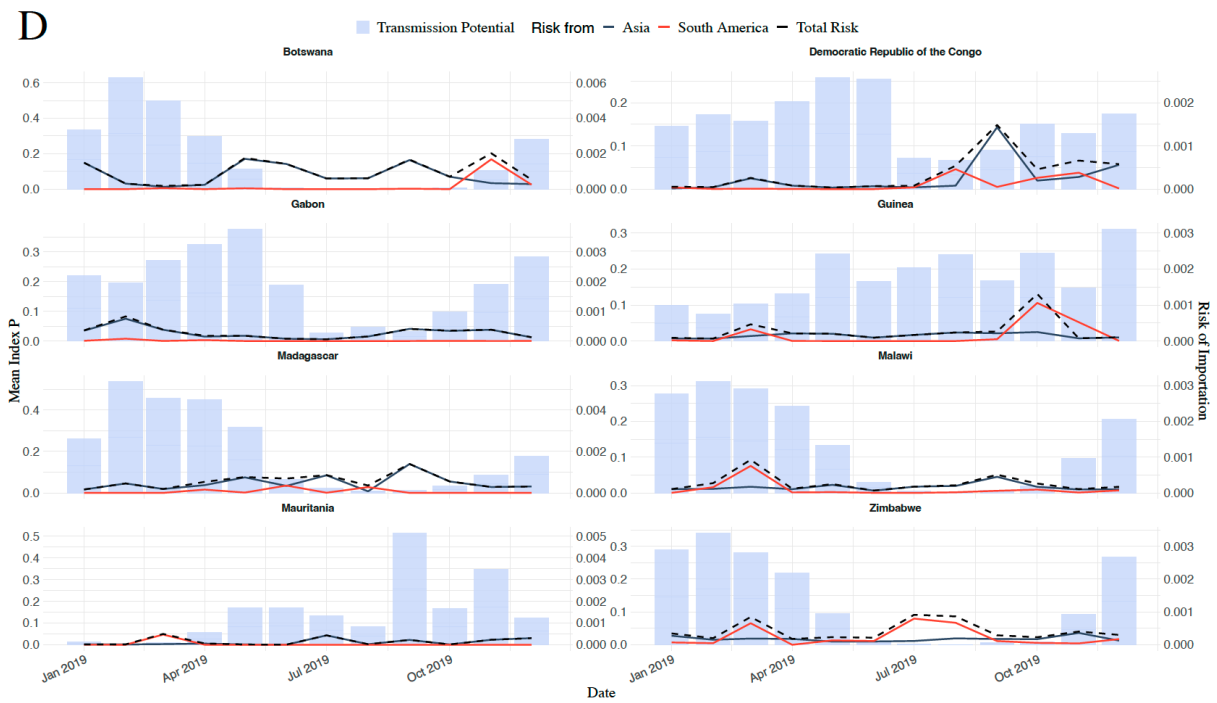

539  
540  
541

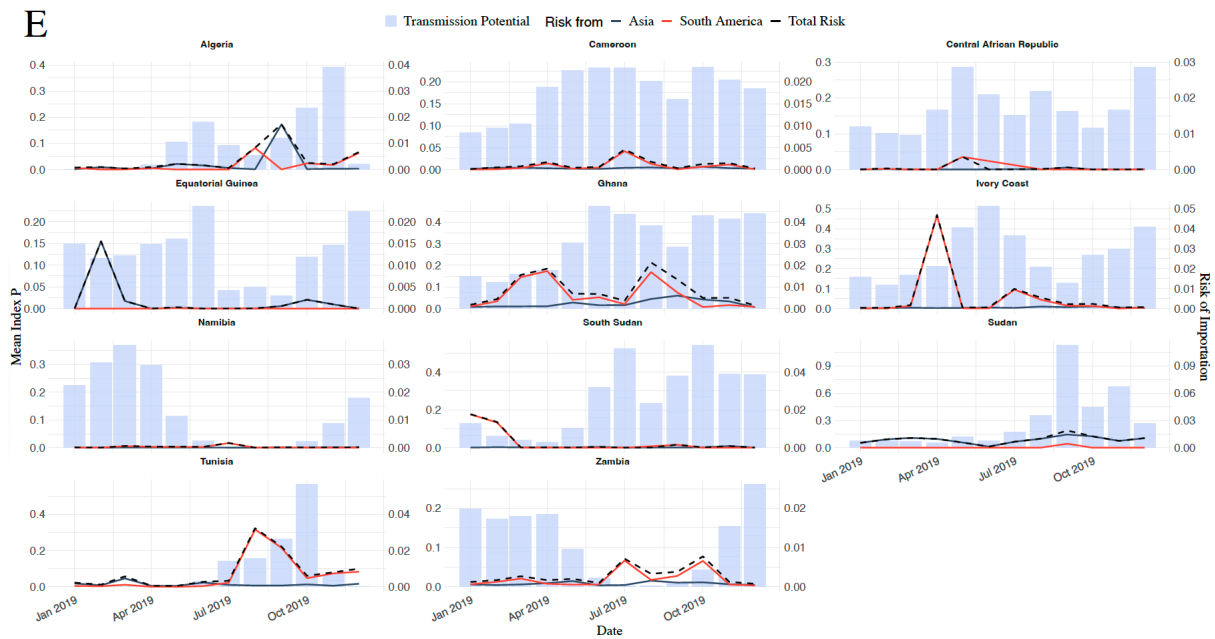

542  
543  
544  
545  
546  
547  
548  
549  
550  
551  
552  
553  
554  
555  
556  
557  
558  
559  
560  
561  
562  
563  
564

Fig S5: Time-varying risk of introduction into African countries in 2019 from Asia (blue line) and South America (red line) along with time-varying transmission potential index nationally. The combined risk is represented by the black dotted line. Panel A) Chad, Gambia, Lesotho, Mali, Mozambique, Niger, Sao Tome and Principe, Somalia. B) Comoros, Libya, Swaziland. C) Benin, Burkina Faso, Burundi, Congo, Djibouti, Eritrea, Guinea Bissau, Liberia, Sierra Leone. D) Botswana, DRC, Gabon, Guinea, Madagascar, Malawi, Mauritania, Zimbabwe. E) Algeria, Cameroon, Central African Republic, EquatorialGuinea, Ghana, Ivory Coast, Namibia, South Sudan, Sudan and Tunisia.



565 Figure S6

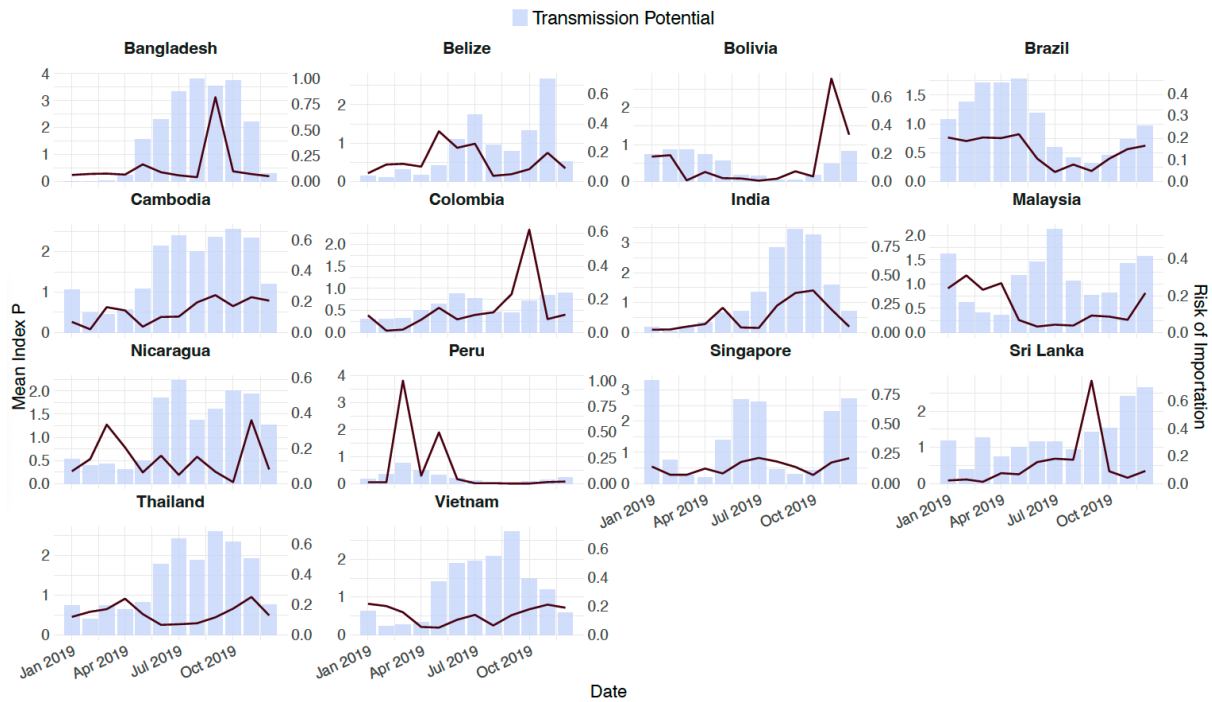

566  
567  
568  
569  
570  
571  
572  
573  
574  
575  
576  
577  
578  
579  
580  
581  
582  
583  
584  
585  
586  
587  
588  
589

Fig S6: Risk of Exportation from countries of high incidence (n=14) considered in this study overlaid across their respective transmission potential across the year.

590 References

591 1. Gubler DJ. Dengue and dengue hemorrhagic fever. Clin Microbiol Rev. 1998;11(3):480–

- 592 96.
- 593 2. Paz-Bailey G, Adams LE, Deen J, Anderson KB, Katzelnick LC. Dengue. *The Lancet*.  
594 2024 Feb 17;403(10427):667–82.
- 595 3. Brady OJ, Gething PW, Bhatt S, Messina JP, Brownstein JS, Hoen AG, et al. Refining the  
596 global spatial limits of dengue virus transmission by evidence-based consensus. 2012;
- 597 4. Stanaway JD, Shepard DS, Undurraga EA, Halasa YA, Coffeng LE, Brady OJ, et al. The  
598 global burden of dengue: an analysis from the Global Burden of Disease Study 2013.  
599 *Lancet Infect Dis*. 2016;16(6):712–23.
- 600 5. Bhatt S, Gething PW, Brady OJ, Messina JP, Farlow AW, Moyes CL, et al. The global  
601 distribution and burden of dengue. *Nature*. 2013 Apr;496(7446):504–7.
- 602 6. Murray NEA, Quam MB, Wilder-Smith A. Epidemiology of dengue: past, present and future  
603 prospects. *Clin Epidemiol*. 2013;299–309.
- 604 7. Nakase T, Giovanetti M, Obolski U, Lourenço J. Global transmission suitability maps for  
605 dengue virus transmitted by *Aedes aegypti* from 1981 to 2019. *Sci Data*. 2023 May  
606 12;10(1):275.
- 607 8. Yang X, Quam MBM, Zhang T, Sang S. Global burden for dengue and the evolving pattern  
608 in the past 30 years. *J Travel Med*. 2021 Dec 1;28(8):taab146.
- 609 9. Kraemer MU, Sinka ME, Duda KA, Mylne AQ, Shearer FM, Barker CM, et al. The global  
610 distribution of the arbovirus vectors *Aedes aegypti* and *Ae. albopictus*. *elife*.  
611 2015;4:e08347.
- 612 10. Gubler DJ. Dengue, urbanization and globalization: the unholy trinity of the 21st century.  
613 *Trop Med Health*. 2011;39(4SUPPLEMENT):S3–11.
- 614 11. Morin CW, Comrie AC, Ernst K. Climate and dengue transmission: evidence and  
615 implications. *Environ Health Perspect*. 2013;121(11–12):1264–72.
- 616 12. Khan W, Zakai HA, Khan K, Kausar S, Aqeel S. Discriminating clinical and biological  
617 features in malaria and dengue patients. *J Arthropod-Borne Dis*. 2018;12(2):108.
- 618 13. Nyenke CU, Nnokam BA, Esiere RK, Nwalozie R. Dengue Fever: Etiology, Diagnosis,  
619 Prevention and Treatment. *Asian J Res Infect Dis*. 2023;14(1):26–33.
- 620 14. Bosire C, Mutuku F, Ndenga B, Nzaro M, Mwendwa K, LaBeaud AD. A narrative review  
621 of dengue fever infection and epidemic activity in Kenya (2010 to 2020). *PAMJ - One*  
622 *Health [Internet]*. 2023 Oct 16 [cited 2024 Mar 19];12(10). Available from: [https://www.one-](https://www.one-health.panafrican-med-journal.com/content/article/12/10/full)  
623 [health.panafrican-med-journal.com/content/article/12/10/full](https://www.one-health.panafrican-med-journal.com/content/article/12/10/full)
- 624 15. Gainor EM, Harris E, LaBeaud AD. Uncovering the Burden of Dengue in Africa:  
625 Considerations on Magnitude, Misdiagnosis, and Ancestry. *Viruses*. 2022 Feb;14(2):233.
- 626 16. WHO Afro Region. *Weekly Epidemiological Record*, 2023, vol.78. *Wkly Epidemiol Rec*.  
627 2023;78(22):279–86.
- 628 17. Foucambert P, Esbrand FD, Zafar S, Panthangi V, Kurupp ARC, Raju A, et al. Efficacy of

- 629 Dengue Vaccines in the Prevention of Severe Dengue in Children: A Systematic Review.  
630 Cureus [Internet]. 2022 Sep 7 [cited 2023 Jun 2];14(9). Available from:  
631 [https://www.cureus.com/articles/105177-efficacy-of-dengue-vaccines-in-the-prevention-](https://www.cureus.com/articles/105177-efficacy-of-dengue-vaccines-in-the-prevention-of-severe-dengue-in-children-a-systematic-review)  
632 [of-severe-dengue-in-children-a-systematic-review](https://www.cureus.com/articles/105177-efficacy-of-dengue-vaccines-in-the-prevention-of-severe-dengue-in-children-a-systematic-review)
- 633 18. Lee TH, Lee LK, Lye DC, Leo YS. Current management of severe dengue infection. *Expert*  
634 *Rev Anti Infect Ther*. 2017 Jan 2;15(1):67–78.
- 635 19. Ross TM. Dengue Virus. *Clin Lab Med*. 2010 Mar 1;30(1):149–60.
- 636 20. Thomas SJ. Is new dengue vaccine efficacy data a relief or cause for concern? *Npj*  
637 *Vaccines*. 2023 Apr 15;8(1):1–6.
- 638 21. Pintado Silva J, Fernandez-Sesma A. Challenges on the development of a dengue  
639 vaccine: a comprehensive review of the state of the art. *J Gen Virol*. 2023;104(3):001831.
- 640 22. Wilder-Smith A, Gubler DJ, Weaver SC, Monath TP, Heymann DL, Scott TW. Epidemic  
641 arboviral diseases: priorities for research and public health. *Lancet Infect Dis*.  
642 2017;17(3):e101–6.
- 643 23. Ryan SJ, Carlson CJ, Mordecai EA, Johnson LR. Global expansion and redistribution of  
644 Aedes-borne virus transmission risk with climate change. *PLoS Negl Trop Dis*.  
645 2019;13(3):e0007213.
- 646 24. Charu V, Zeger S, Gog J, Bjørnstad ON, Kissler S, Simonsen L, et al. Human mobility and  
647 the spatial transmission of influenza in the United States. *PLoS Comput Biol*.  
648 2017;13(2):e1005382.
- 649 25. Merler S, Ajelli M. The role of population heterogeneity and human mobility in the spread  
650 of pandemic influenza. *Proc R Soc B Biol Sci*. 2010;277(1681):557–65.
- 651 26. Bogoch II, Brady OJ, Kraemer MUG, German M, Creatore MI, Brent S, et al. Potential for  
652 Zika virus introduction and transmission in resource-limited countries in Africa and the  
653 Asia-Pacific region: a modelling study. *Lancet Infect Dis*. 2016 Nov 1;16(11):1237–45.
- 654 27. Kraemer MU, Hill V, Ruis C, Dellicour S, Bajaj S, McCrone JT, et al. Spatiotemporal  
655 invasion dynamics of SARS-CoV-2 lineage B. 1.1. 7 emergence. *Science*.  
656 2021;373(6557):889–95.
- 657 28. Tegally H, Wilkinson E, Tsui JLH, Moir M, Martin D, Brito AF, et al. Dispersal patterns and  
658 influence of air travel during the global expansion of SARS-CoV-2 variants of concern.  
659 *Cell*. 2023;186(15):3277–90.
- 660 29. Soriano-Paños D, Arias-Castro JH, Reyna-Lara A, Martínez HJ, Meloni S, Gómez-  
661 Gardeñes J. Vector-borne epidemics driven by human mobility. *Phys Rev Res*.  
662 2020;2(1):013312.
- 663 30. Stoddard ST, Morrison AC, Vazquez-Prokopec GM, Paz Soldan V, Kochel TJ, Kitron U,  
664 et al. The role of human movement in the transmission of vector-borne pathogens. *PLoS*  
665 *Negl Trop Dis*. 2009 Jul 21;3(7):e481.

- 666 31. Global Administrative Areas. GADM Database. GADM Database Glob Adm Areas  
667 [Internet]. 2019; Available from: [www.gadm.org](http://www.gadm.org).
- 668 32. Gilbert M, Pullano G, Pinotti F, Valdano E, Poletto C, Boëlle PY, et al. Preparedness and  
669 vulnerability of African countries against importations of COVID-19: a modelling study. *The*  
670 *Lancet*. 2020 Mar 14;395(10227):871–7.
- 671 33. Frank C, Lachmann R, Wilking H, Stark K. Increase in dengue fever in travellers returning  
672 from Egypt, Germany 2023. *Eurosurveillance*. 2024 Feb 1;29(5):2400042.
- 673 34. Barik P, Goswami P. Quantifying the Impact of Rainfall Categories on Dengue  
674 Occurrence: A Multi-Site Analysis in India. 2023;
- 675 35. Mutheneni SR, Morse AP, Caminade C, Upadhyayula SM. Dengue burden in India: recent  
676 trends and importance of climatic parameters. *Emerg Microbes Infect*. 2017 Aug;6(8):e70.
- 677 36. Shil P. Rainfall and dengue occurrences in India during 2010–2016. *Biomed Res J*.  
678 2019;6(2):56.
- 679 37. Gardner LM, Fajardo D, Waller ST, Wang O, Sarkar S. A Predictive Spatial Model to  
680 Quantify the Risk of Air-Travel-Associated Dengue Importation into the United States and  
681 Europe. *J Trop Med*. 2012 Mar 14;2012:e103679.
- 682 38. Huang YM. Contributions to the mosquito fauna of Southeast Asia. XIV. The subgenus  
683 *Stegomyia* of *Aedes* in Southeast Asia I-The scutellaris group of species. 1972;
- 684 39. Semenza JC, Sudre B, Miniota J, Rossi M, Hu W, Kossowsky D, et al. International  
685 dispersal of dengue through air travel: importation risk for Europe. *PLoS Negl Trop Dis*.  
686 2014;8(12):e3278.
- 687 40. Tatem AJ, Rogers DJ, Hay SI. Global transport networks and infectious disease spread.  
688 *Adv Parasitol*. 2006;62:293–343.
- 689 41. Alfsnes K, Eldholm V, Gaunt MW, de Lamballerie X, Gould EA, Pettersson JHO. Tracing  
690 and tracking the emergence, epidemiology and dispersal of dengue virus to Africa during  
691 the 20th century. *One Health*. 2021;13:100337.
- 692 42. Schwartz E, Weld LH, Wilder-Smith A, von Sonnenburg F, Keystone JS, Kain KC, et al.  
693 Seasonality, Annual Trends, and Characteristics of Dengue among Ill Returned Travelers,  
694 1997–2006. *Emerg Infect Dis*. 2008 Jul;14(7):1081–8.
