# 1 Assessing Dengue Virus Importation Risks in 2 Africa: A Climate and Travel-Based Model

3  
4 **Authors:** Jenicca Poongavanan, Msc<sup>1</sup>, José Lourenço, PhD<sup>2,3</sup>, Joseph L.-H. Tsui, Msc<sup>4</sup>,  
5 Vittoria Colizza, PhD<sup>5,6</sup>, Yajna Ramphal, Bsc<sup>1</sup>, Cheryl Baxter, PhD<sup>1</sup>, Moritz U.G. Kraemer,  
6 PhD, Prof<sup>4,7</sup>, Marcel Dunaiski, PhD<sup>8</sup>, Tulio de Oliveira, PhD, Prof<sup>1,9</sup>, Houriiyah Tegally,  
7 PhD<sup>1</sup>

8  
9 1 Centre for Epidemic Response and innovation (CERI), Stellenbosch University,  
10 Stellenbosch, South Africa

11 2 BioISI (Biosystems and Integrative Sciences Institute), University of Lisbon, Lisbon,  
12 Portugal

13 3 Universidade Católica Portuguesa, Medical School, Biomedical Research Center, Lisboa,  
14 Portugal

15 4 Department of Biology, University of Oxford, Oxford, UK

16 5 Sorbonne Université, INSERM, Institut Pierre Louis d'Epidémiologie et de Santé Publique  
17 (IPLESP), Paris, France

18 6 Department of Biology, Georgetown University, Washington, District of Columbia, USA

19 7 Pandemic Sciences Institute, University of Oxford, UK

20 8 Computer Science Division, Department of Mathematical Sciences, Stellenbosch  
21 University, Stellenbosch, South Africa

22 9 KwaZulu-Natal Research Innovation and Sequencing Platform (KRISP), University of  
23 KwaZulu-Natal, Durban, South Africa

24

25 Corresponding authors: Houriiyah Tegally ([houriiyah@sun.ac.za](mailto:houriiyah@sun.ac.za)) and Tulio de Oliveira  
26 ([tulio@sun.ac.za](mailto:tulio@sun.ac.za))

27

28 **Keywords:** Arboviruses, Dengue, Introductions, Mobility, Africa, Risk Flow

29

30

31

32

33

34

## 35 Abstract

36 Background: Dengue is a significant global public health concern that poses a threat to  
37 Africa. Particularly, African countries are at risk of viral introductions through air travel  
38 connectivity with areas of South America and Asia that experience frequent explosive  
39 outbreaks. Limited reporting and diagnostic capacity hinder a comprehensive assessment of  
40 continent-wide transmission dynamics and deployment of surveillance strategies in Africa.  
41 This study aimed to identify African airports at high risk of receiving dengue infected  
42 passengers from Asia, Latin America and other African countries with high dengue  
43 incidence.

44

45 Methods: The risk of dengue introduction into Africa from countries of high incidence in  
46 Africa, Latin America and within Africa was estimated based on origin-destination air travel  
47 flows and epidemic activity at origin. We produced a novel proxy for local dengue epidemic  
48 activity using a composite index of theoretical climate-driven transmission suitability and  
49 population density, which we used, along with travel information in a risk flow model, to  
50 estimate importation risk.

51

52 Findings: We find that countries in East Africa face higher estimated risk of importation from  
53 Asia and other East African countries, whereas for West African countries, larger risk of  
54 importation is estimated from within the region. Some countries with high risk of importation  
55 experience low local transmission suitability which likely hampers the chances that  
56 importations lead to local transmission and establishment. Conversely, Mauritius, Uganda,  
57 Ivory Coast, Senegal, and Kenya are identified as countries susceptible to dengue  
58 introductions during periods of persistent transmission suitability.

59

60 Interpretation: Our work improves data driven allocation of surveillance resources, in regions  
61 of Africa that are at high risk of dengue introduction and establishment, including from  
62 regional circulation. This will be critical in detecting and managing imported cases and can  
63 improve local response to dengue outbreaks.

64

65 Funding: Rockefeller Foundation, National Institute of Health, EDCTP3 and Horizon Europe  
66 Research and Innovation, World Bank Group, Medical Research Foundation, Wellcome  
67 Trust, Google.org, Oxford Martin School Pandemic Genomics programme, John Fell Fund.

68

69 **Research in context**

70 **Evidence before this study**

71 Despite the significant global burden of dengue virus, Africa remains relatively understudied  
72 due to limited reporting and diagnostic capabilities. We searched PubMed for articles in  
73 English published on and before May 6, 2024, that included “Dengue OR dengue”, “Africa”,  
74 and "importation OR imported". Few studies have investigated the introduction of dengue  
75 into African countries. Limited evidence includes phylogeographic studies describing a  
76 potential introduction of dengue from Brazil into Angola in 2013 and evidence of multiple  
77 historical introductions of dengue from Asia to Africa over several years. Before our study,  
78 none had employed a modelling framework to investigate the continental risks of importing  
79 dengue via viremic travellers into African countries from other regions of high dengue  
80 incidence.

81

82 **Added value of this study**

83 This study provides a novel approach to assessing the risk of dengue importation into Africa,  
84 integrating climate-dependent transmission suitability and air travel data. By identifying  
85 high-risk regions and highlighting the complex interplay between travel patterns, population  
86 density, and climatic factors, our findings enhance the understanding of ongoing dengue  
87 dynamics in Africa. This information enables targeted allocation of surveillance resources,  
88 improving preparedness and response to potential dengue outbreaks in susceptible regions.

89

90 **Implications of all the available evidence**

91 The integration of transmission suitability as a proxy for local epidemic activity and air travel  
92 data into a risk flow metric provides valuable insights into the risk of dengue importation into  
93 African airports from high-incidence countries. These findings have implications for tailored  
94 surveillance and prevention strategies in high-risk regions, facilitating early detection and  
95 management of potential imported dengue outbreaks in Africa.

96

## 97 Introduction

98 Dengue is an arthropod-borne virus with four main serotypes and is a member of the genus  
99 *Flavivirus* of the family *Flaviviridae* (1,2). It is thought to cause between 5.2 million and 390  
100 million infections around the world every year, mostly transmitted by *Aedes aegypti* and *Ae.*  
101 *albopictus* mosquitoes (3,4). Approximately half of the global human population is estimated  
102 to currently live in areas that are environmentally suitable for dengue transmission (3,5,6).  
103 Dengue is now endemic in more than 100 countries, with reported outbreaks predominantly  
104 in Central America, South America, and Southeast Asia, and has recently established  
105 epidemic cycles in parts of Africa and North America (6–8).

106

107 Despite the widespread distribution of mosquito vectors in Africa (9) and favourable  
108 transmission conditions characterised by high temperatures and increased urbanisation  
109 (7,10,11), severe gaps exist in our understanding of the transmission intensities of the virus  
110 on the continent. Limited diagnostic capacity and reporting on dengue incidence make it  
111 difficult to assess the true burden of dengue in Africa (3,5). Similarity of symptoms with  
112 other febrile illnesses such as malaria also play a role in underdiagnosis (12,13). Consensus  
113 of evidence studies have reported that dengue transmission is endemic in 34 countries in the  
114 African region (14,15). It is therefore speculated that dengue is more widespread in Africa  
115 than previously thought. In 2023 alone, 16 countries in Africa reported large dengue  
116 outbreaks (16).

117

118 Risk assessment for dengue in Africa has to consider several factors. Given frequent  
119 explosive dengue outbreaks in South America and Asia, African countries are, for instance, at  
120 risk of constant viral introductions through air travel connectivity. Once introduced, dengue  
121 can theoretically spread rapidly in large parts of Africa due to the presence of suitable  
122 vectors, appropriate environmental conditions and limited population immunity. Many initial  
123 dengue infections are also prone to be asymptomatic, which can lead to underreporting and  
124 unnoticed spread (1). While primary dengue infections are rarely fatal, secondary infections  
125 with a different dengue virus serotype can be highly problematic, potentially causing severe  
126 dengue fever (17). Even in countries where dengue is thought to be endemic, the importation  
127 of dengue genetic variants either from high incidence South American or Asian countries can  
128 exacerbate the burden of disease, favour serotype diversity and seed new explosive outbreaks.

129

130 The potential for dengue importation into a given location via viremic travellers is a function  
131 of transmission occurring in the origin country and the volume of travellers from such  
132 country to the destination country of interest. It is well documented that increased  
133 international travel and trade have facilitated dengue's global spread and mixing of viral  
134 serotypes and genotypes (10,6,18,19). The influence of human mobility on pathogen spread  
135 has previously been characterised e.g. for influenza (20,21), Zika (22) and more recently, and  
136 very extensively, for SARS-CoV-2 (23,24). Human mobility also plays a key role in shaping  
137 individuals' interactions with disease-carrying vectors and consequently affecting viral  
138 transmission (25,26). Understanding the combination of factors driving dengue introduction  
139 and onward transmission is crucial for effective surveillance, prevention, and control in  
140 Africa in the absence of antiviral treatment, adequate diagnosis, and widespread vaccine  
141 cover. This study aimed to identify African airports at high risk of receiving dengue infected  
142 passengers from Asia, Latin America and other African countries with high dengue  
143 incidence. In doing so, it identifies potential high risk areas and optimal periods (at a monthly  
144 scale) during which enhanced disease surveillance could contribute more to local public  
145 health.

## 146 Methods

### 147 2.1 Data

#### 148 2.1.1 Air Travel

149 The air travel flow data used in this study was obtained from the International Air Transport  
150 Association (IATA). It comprises the number of origin-destination passenger tickets and  
151 accounts for any connections at intermediate airports for the year 2019. We opted for the year  
152 2019 to reflect a recent customary year of travel preceding disruptions due to the COVID-19  
153 pandemic. The data comprises monthly passenger volumes from 14 high incidence countries  
154 outside of Africa and 18 countries within the African continent that reported dengue outbreak  
155 in the last 10 years (selection described further down) to 54 African countries, encompassing  
156 all commercial airports (n = 197) in both the source and destination regions.

## 157 2.1.2 Transmission Suitability Estimate

158 We sourced spatio-temporal estimates of climate-based transmission suitability of dengue  
159 (referred to as index P) developed and made accessible by estimates from (7) Nakase et al.  
160 (2023; <https://doi.org/10.6084/m9.figshare.21502614>). The index used in this study quantifies  
161 the transmission capacity of a single adult female mosquito throughout its lifetime in a  
162 completely susceptible host population, incorporating factors such as infectious periods and  
163 oviposition. For a more detailed explanation and validation of the P index, see (7), which  
164 provides an in-depth analysis and evidence supporting model, including spatio-temporal  
165 validation with regional dengue data from Brazil and Thailand. The index P metric utilises  
166 local temperature and humidity time series (spatial pixel resolution used was  $0.25^\circ \times 0.25^\circ$   
167 ( $\sim 28 \text{ km}^2$ ) as primary inputs, which enables its application to any location with available  
168 climate data. For more detailed discussions on how climatic factors like temperature and  
169 rainfall affect mosquito biology and dengue transmission, see e.g. (27–29).

170

171 We post-processed raw climate-based transmission suitability P estimates to define periods of  
172 *persistence suitability*. Since P measures the number of hosts a single infected female may  
173 transmit DENV to during its infectious lifespan, a threshold of  $P > 1$  represents the potential  
174 for epidemic expansion (i.e. single infected mosquitoes would transmit to more than one  
175 host). Following this rationale, periods of persistence suitability are then defined as the  
176 months where  $P > 1.0$ .

## 177 2.1.3 Population Density

178 Population density at a given location significantly influences dengue transmission due to its  
179 role in determining the availability of human hosts for mosquito biting and thus the virus. To  
180 consider population density, we extracted the population count of each district within  
181 countries from the Gridded population of the World, using administrative (level 1) boundary  
182 data from the GADM database (30). To calculate the population density of a province, we  
183 aggregated the population count values of grid cells intersecting the province boundary and  
184 divided by the respective areas

## 185 2.2 Transmission suitability as a proxy for case counts

186 To address the challenge of missing or insufficient dengue case data, we explored the  
187 possibility of using climate-based transmission suitability (index P) as a proxy. To assess the

188 viability of replacing dengue case data with transmission suitability, we conducted a  
189 preliminary correlation test between transmission suitability and monthly dengue cases for  
190 countries in which monthly dengue case data was available (see supplementary figure S1,  
191 p.1). Moreover, using transmission suitability instead of case data would allow for a more  
192 fine scaled understanding of dengue activity in a country, surpassing the resolution typically  
193 available at the national level.

194

195 For this study, we considered countries outside of Africa with large outbreaks of dengue in  
196 2019 as flagged by the European Centre for Disease Prevention and Control (ECDC)  
197 (accessed on 10th May 2023; <https://www.ecdc.europa.eu/en/dengue>). These were  
198 predominantly in Latin America and Asia. Monthly dengue case data from these countries  
199 were then extracted from public health organisations such as the Pan American Health  
200 Organisation (PAHO; [www3.paho.org](http://www3.paho.org)), from governmental health reports or bulletins and  
201 from statistical bureau websites (governmental reporting websites, WHO reports, etc). The  
202 inclusion criteria for countries of high dengue incidence used in this study was based on the  
203 availability of monthly case data in 2019 as it allowed for reliable testing of the transmission  
204 suitability proxy and use of travel data for the same year. This resulted in a final selection of  
205 14 countries of high dengue incidence in Latin America and Asia, namely: Brazil, Bolivia,  
206 Peru, Sri Lanka, Vietnam, Malaysia, Columbia, Thailand, Nicaragua, India, Bangladesh,  
207 Cambodia, Singapore and Belize. We also extracted province-level case data where openly  
208 available. In the correlation coefficient computation we also incorporated data from two  
209 African countries, Burkina Faso and Mauritius, for which monthly data for the year 2019  
210 were available.

211

212 We use the Spearman's Rank correlation coefficient to examine the relationship between  
213 transmission suitability and monthly dengue case counts for 16 countries. Following the  
214 methodology used by (7), we computed correlation coefficients between case counts and  
215 transmission suitability with various month lags (month+0, month+1 and month +2). We  
216 found (see supplementary figure S1, p.1) a significant positive correlation between  
217 transmission suitability and dengue cases for most countries, with the highest association at a  
218 lag of one month (12 out of 16 countries), corroborating previous analyses (7). The strength  
219 of the association ranged from -0.204 to 0.954. For some countries ( $n = 3$ ), we found a weak  
220 correlation which could be caused by several factors, such as: i) limited case data obscuring  
221 seasonal patterns, which results in poor alignment with the index, ii) the national-level index



222 failing to accurately reflect the overall case distribution if cases are concentrated in specific  
 223 regions. Correlation between case data and transmission suitability was also calculated at  
 224 higher resolution (State level) for Brazil, and the strongest relationship was also found at a  
 225 one month lag (see supplementary figure S2, p.2). Thus, for the rest of the presented analyses,  
 226 transmission suitability with a one-month lag was used. Subsequently, we included 18  
 227 African countries that have experienced a dengue outbreak in the past decade as reported in  
 228 the WHO Afro reports. The 18 countries were: Angola, Benin, Burkina Faso, Chad,  
 229 Comoros, Ethiopia, Ghana, Guinea, Kenya, Mali, Mauritania, Mauritius, Niger, Nigeria,  
 230 Senegal, Tanzania, Togo and Sao Tome and Principe.

231  
 232 While the transmission suitability index serves as a valuable indicator of dengue risk in a  
 233 given region, its standalone consideration provides only an answer to whether climate is  
 234 suitable for transmission. Additional factors, such as the presence of the host and vector, are  
 235 crucial for a more accurate assessment. Specifically, *Aedes* mosquito density data, along with  
 236 host density and various other environmental factors (e.g. precipitation, vector habitat  
 237 distribution, etc) that influence the spatial distribution of vectors, remain relevant for a  
 238 complete understanding of the biological system. The main reason why such actors are often  
 239 left out of modelling approaches is the lack of sufficient data with adequate spatio-temporal  
 240 resolution. In this study, advancing on others based solely on climate-based suitability for  
 241 vectors or viral transmission, we address one extra factor by incorporating human population  
 242 density alongside the transmission suitability index. Using Spearman's Rank correlation  
 243 coefficient, we also examine the correlation between dengue cases and the composite index at  
 244 a provincial level (see supplementary figure S3, p.3). We thus define a composite index ( $\square$ ):

$$\square_{\square} = \square_{\square_{\square}} \square_{\square_{\square}} (\square_{\square_{\square}} \square) \\ * \square_{\square_{\square}} \square_{\square_{\square}} (\square_{\square_{\square}} \square)$$

246 which captures the combined influence of the transmission suitability and the population  
 247 density at the district level, by multiplying both elements (see supplementary figure S4 and  
 248 S5, p.4).

249  
 250

## 251 2.3 Risk Flow Metric

252 The importation risk to each airport (destination) in each African country was estimated as  
253 the probability of importing a case from each state (origin) within each country of high  
254 incidence, accounting for the origin–destination travel flows and their different, estimated  
255 transmission suitability from the originating states. For cross-country comparisons, we  
256 aggregated the resulting risk of introduction from each airport to the country level, and for  
257 visualisation purposes, we calculated the average risk across each airport over the 12-month  
258 period (January - December 2019).

259

260 The methodology was adapted from (31) and is as follows:

261 Risk flow ( $r_{i\alpha}$ ) from origin state  $i$  to destination airport  $\alpha$  is calculated by:

$$r_{i\alpha} = \frac{t_i n_i A_{i\alpha}}{\sum_j t_j n_j}$$

262

263 where  $\lambda_i$  is the combined transmission suitability and population density of state  $i$ ,  $t_{i\alpha}$  is the  
264 travel flux from the origin state  $i$ ,  $\lambda_{i\alpha}$  is the probability of a traveller flying from  $i$  to  $\alpha$ ,  
265 conditioned on travelling internationally from  $i$  (by construction,  $\sum_{\alpha} \lambda_{i\alpha} = 1$ ). The  
266 denominator accounts for the transmission suitability in various states and the potential risk  
267 associated with travellers from different origin states. It is constructed as the sum product of  
268 all transmission suitability and travel flows originating from each individual state (denoted by  
269  $j$ ). This normalisation process ensures that the impact of each state's transmission suitability  
270 and travel flow is proportionally represented in relation to the collective risk from all origin  
271 states.

272

273 The total risk of case importation to destination  $\alpha$  is then given by

$$R_{\alpha} = \sum_i r_{i\alpha}$$

274 This risk is normalised such that  $\sum_{\alpha} R_{\alpha} = I$ .

275

276 To summarise and compare the overall introduction risks of dengue into African countries  
277 from high incidence countries in Asia and South America, we aggregated the risk originating  
278 from Asia, South America and Africa separately by summing it across all airports to the

279 district level and then calculating the average value over all months. We then computed the  
280 proportions of risk coming from Asia, South America and Africa for each district. To further  
281 explore the dynamics between introduction risk and the local transmission suitability, we  
282 applied cosine similarity, a measure of synchrony between two time series. Cosine similarity  
283 helped us evaluate how closely the temporal patterns of introduction risk align with local  
284 transmission suitability. The cosine similarity ranges between 0 and 1, with 0 being less  
285 synchronous and 1 being highly synchronous.

286

287 Additionally, in aggregating the risk for destination countries, we conducted a secondary  
288 computation of risk emphasising the locations characterised by persistence suitability (see  
289 section 2.1.2). This was done by excluding any estimate of risk that occurred outside of times  
290 of persistence suitability (i.e. when index  $P \leq 1$ ) in respective destination locations. In other  
291 words, we filter only for estimated risks that are most likely to lead to onward transmission  
292 and local outbreaks. We term this introduction suitability while we term the risk based on the  
293 non-filtered values the raw introduction risk. It is important to note that the resulting risk  
294 values should not be interpreted in absolute terms but rather as indicators of the direction and  
295 timing of risk introduction, highlighting where and when the risk is coming in.

## 296 Results

### 297 **Dengue introduction risks from high incidence Asian and South American countries** 298 **into Africa**

299 Several countries in Africa are estimated to have high transmission suitability for dengue and  
300 simultaneously high population density, indicating elevated potential for local transmission  
301 following viral introductions (Supplementary Figure S4, p.4). At the same time, certain  
302 countries on the continent are receiving variable, and sometimes high volumes of  
303 international passengers from various Asian and South American countries (Supplementary  
304 Figure S6, p.5). In 2019, over 504 million travellers entered the African continent from the 14  
305 high-incidence countries. Of the total number of travellers, 39% originated from Southeast  
306 Asia, 34% from South Asia and 27% from South America (Supplementary Figure S6, p.5).  
307 The months with the highest travel volume entering the African continent from these places  
308 were November, December, and January.

309

310 The total risk flow of dengue from countries with high incidence rates, from Asia and South  
311 America showed that South Africa and Egypt were the countries at higher risk of dengue  
312 importation, generally considered as popular tourist destinations receiving large volumes of  
313 vacationers, followed by Kenya, Angola, Morocco, Seychelles and Mauritius (Figure 1).  
314 Egypt is exposed to significant risk primarily originating from Asia, specifically its biggest  
315 risk coming from Malaysia. Kenya, Mauritius, Tanzania, and Uganda exhibit an elevated risk  
316 of introduction from India. Risks from Singapore were also high, especially towards  
317 Mauritius, South Africa and Egypt. Risks from Vietnam are relatively low across the entire  
318 continent, with the most significant potential impact observed in South Africa and Angola.  
319 Additionally, Morocco and Nigeria are identified as regions with a considerable risk of  
320 disease introduction from Nicaragua.

321

322 Results revealed a general trend that countries in the southern and eastern African region are  
323 faced with higher risks of dengue importation from Asia, whereas central, western and a  
324 portion of northern African countries face higher risk of introduction from South America.  
325 South Africa is estimated to receive large introduction risks from both origin regions. When  
326 considering the raw risks of introductions overlaid onto the local transmission suitability  
327 index across Africa, it becomes clear that high risk of introduction is not necessarily linked to  
328 high transmission suitability (Figure 1). For instance, the high risks of introduction into South  
329 Africa may not necessarily translate to transmission locally due to very low dengue  
330 transmission suitability.

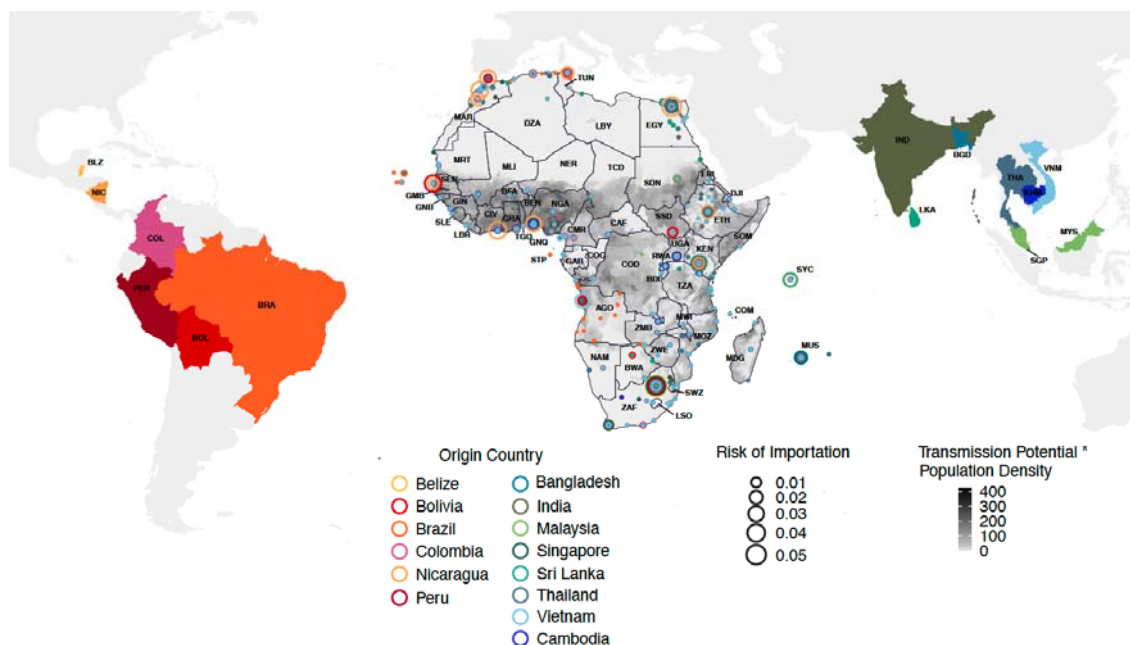

331

332 **Figure 1. Mean risk of dengue introduction into African countries in 2019 from 14**  
333 **countries in Asia and Latin America.** The risk of dengue introduction into African  
334 countries from 14 origin countries in Asia and Latin America is represented by circles on the  
335 African continent. The size of the circles represent the size of the risk averaged over the 12  
336 months for each airport in Africa. The colour of the circles represents the country from which  
337 the risk is coming from and the fill colour of those countries are consistently matched. The  
338 fill colour of the African continent represents the index of transmission suitability multiplied  
339 by population density to highlight the hotspots of high transmission at the destination.

340

#### 341 **Dengue introduction risks within Africa**

342 The analysis of dengue introduction risk into African countries from other African countries  
343 with dengue circulation revealed significant regional patterns. We identified that countries in  
344 West Africa and East Africa exhibit higher importation risks, particular from regional  
345 transmission, compared to other regions (Figure 2). High importation risks are estimated into  
346 countries such as Kenya, Tanzania, Cameroon and Gabon. A notable pattern is that the  
347 importation risk within the East African region primarily originates from within the region  
348 itself, a trend also observed for West Africa. In contrast, countries in Northern Africa, such as  
349 Libya and Tunisia and those in Southern Africa, such as South Africa, exhibit lower dengue  
350 importation risks from the African continent itself.

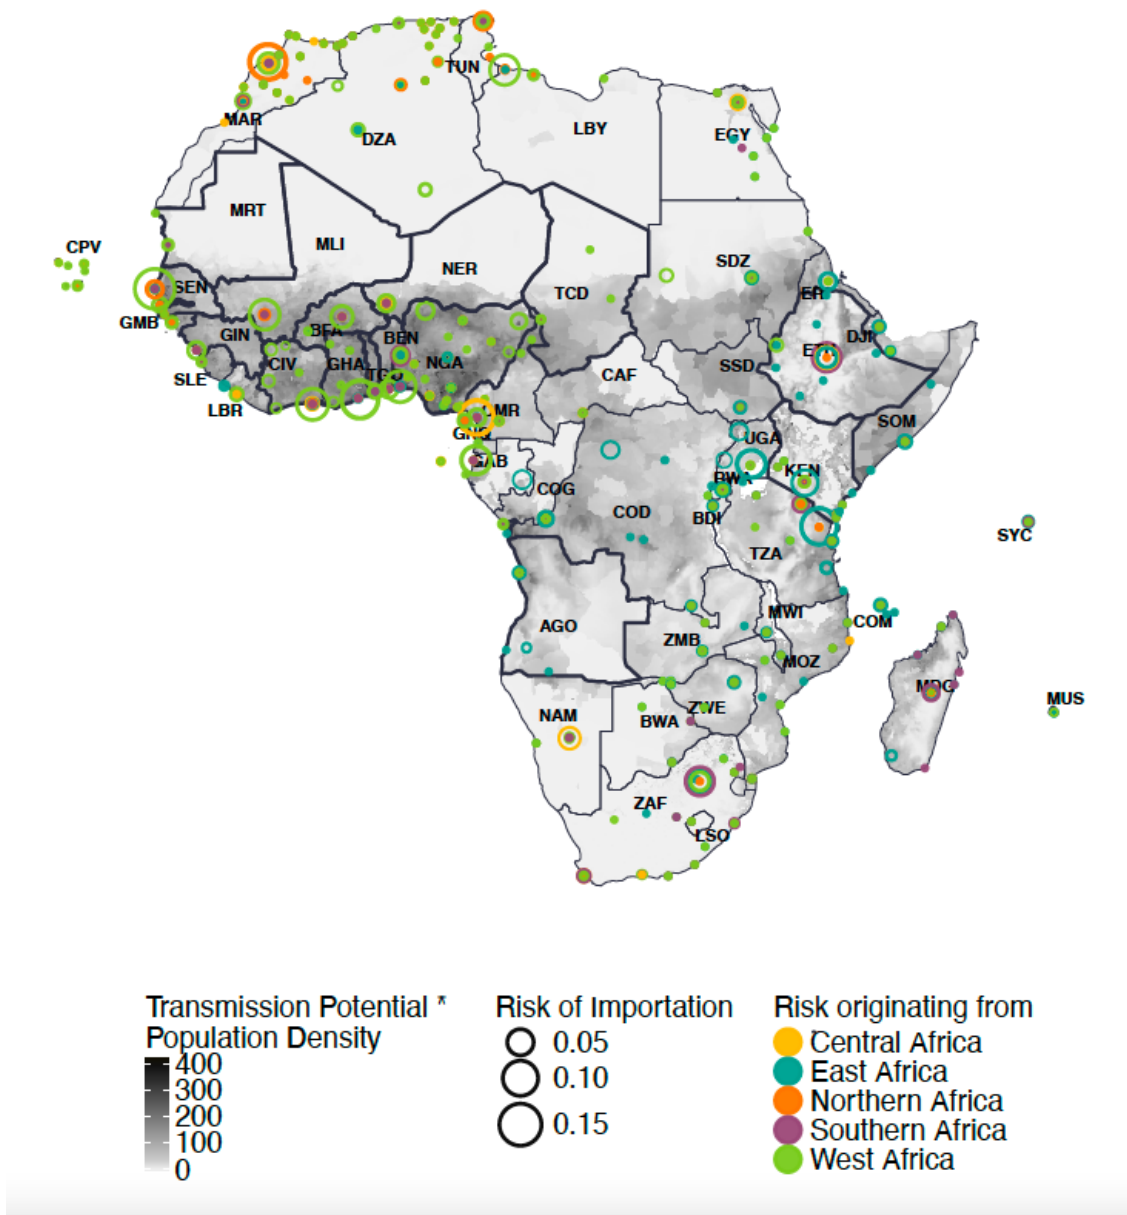

351

352 **Figure 2: Mean risk of dengue introduction into African countries in 2019 from 18**

353 **African countries with Dengue circulation.** Originating African countries considered here

354 are Chad, Sao Tome and Principe (Central Africa), Comoros, Ethiopia, Kenya, Tanzania

355 (East Africa), Benin, Burkina Faso, Ghana, Guinea, Mali, Niger, Nigeria, Senegal, Togo

356 (West Africa), Angola, Mauritius (Southern Africa) and Mauritania (Northern Africa). The

357 risk of dengue introduction into African countries is represented by circles on the African

358 continent coloured by the corresponding region of the originating African country. The size

359 of the circles represent the size of the risk averaged over the 12 months for each airport in

360 Africa. The border for African countries considered as originating locations in the study are

361 outlined in black. The fill colour of the African continent represents the index of transmission  
362 suitability multiplied by population density to highlight the hotspots of high transmission at  
363 the destination.

364

### 365 **Spatiotemporal variation in risks of introduction and local transmission suitability**

366 In addition to quantifying the risk of dengue introductions from countries of high incidence in  
367 Asia and South America we evaluated the timing of these introductions and whether they  
368 would arrive at periods of high local transmission suitability in Africa. For this, the monthly  
369 introduction risk was mapped to local transmission suitability at the airport level in Africa.  
370 Egypt was estimated to be at high risk of dengue introduction during the second half of the  
371 year from both Asia and South America (Figure 3). This temporal pattern aligns with a  
372 concurrent period of heightened transmission suitability within the country, which could  
373 indicate a higher likelihood of viral introductions leading to onward transmission. To  
374 quantify the synchrony between the estimated viral importation risk and the local  
375 transmission suitability, we computed the cosine similarity (CS) between the different time-  
376 series, which revealed a CS of 0.311 for estimated risks from Asia and 0.147 from Latin  
377 America into Egypt (see Supplementary Table S1, p.10). In fact in 2023, Egypt experienced a  
378 large dengue outbreak around September to November (32), which coincides with peaks in  
379 estimated risk and transmission suitability. Angola and Ethiopia both were estimated to have  
380 a continuous risk of disease introduction from Asia throughout the year. However, in Angola,  
381 the transmission suitability was predicted to decline during the months of July, August, and  
382 September. Mauritius was also estimated to be at high risk of introduction from Asia. The  
383 cosine similarity between the risk of introduction and transmission suitability for Mauritius  
384 was 0.437 for Asia and 0.183 for South America. On the other hand, we observed high risks  
385 of dengue introduction into South Africa but, in general, the country exhibited a low  
386 transmission suitability throughout the year, indicating these potential introductions as likely  
387 impasses for transmission. In Nigeria, the majority of the high risk of introduction from South  
388 America were estimated to occur during periods of lower local transmission suitability.  
389 Angola and Mauritius were identified as being at high-risk of suitable introductions, given the  
390 combination of high and synchronous risk of introduction from Asia (see Supplementary  
391 Table S1, p.1).

392

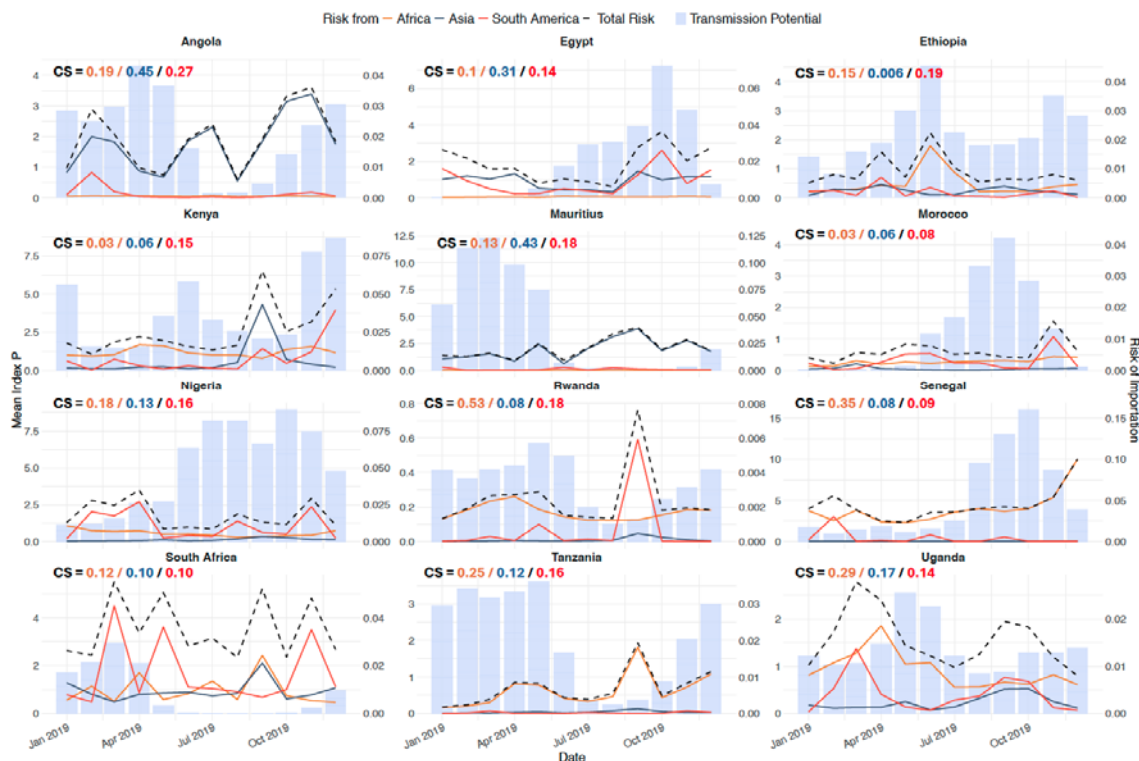

393

394 **Figure 3. Time-varying risk of introduction into selected African countries in 2019.** The  
 395 blue, red and orange lines represent the risk of importation from Asia, South America and  
 396 Africa, respectively, and the dotted line represents the total risk of importation from both  
 397 continents and African countries across the year. The risk of importation was aggregated at  
 398 the national level by summing the individual risks from all airports within each African  
 399 destination country. The blue bars represent the time-varying transmission suitability index.  
 400 The CS value represents the cosine similarity between the two timelines, where a value of 0  
 401 indicates low synchrony and a value of 1 indicates high synchrony. Here, we demonstrate  
 402 countries that had the most synchronicity between transmission suitability and risk of  
 403 introduction - see supplementary S7, p.6 for additional countries.

404

405

#### 406 **Overall introduction suitability in Africa**

407 We then integrated the risk of dengue importation from 14 countries outside of Africa with  
 408 that from 18 African countries to gain a clearer understanding of the proportion of  
 409 importation risk originating from within the African continent compared to that from external  
 410 sources. We filtered for risk estimates that are most likely to lead to onward transmission:  
 411 introduction suitability risk, that is, risks that occur during periods of persistence suitability



412 (P>1). Figure 4A illustrates the aggregated raw risk of dengue introduction throughout the  
413 year 2019 across individual provinces or districts (administrative level 1) within each African  
414 country, and aggregated as originating either from Latin America, Asia, West, East, Central,  
415 Northern or Southern Africa. Conversely, Figure 4B presents the aggregated introduction  
416 suitability of dengue into Africa. Notably, in South Africa, where the transmission suitability  
417 (P) remains consistently below 1 throughout the year, the risk of dengue evolving into an  
418 outbreak from an introduction is negligible.

419

420 In our analysis, a noteworthy shift in risk proportionality emerged when focusing on  
421 introduction suitability compared to raw risk. For example, in the case of Dakar in Senegal,  
422 initially, 87.7% of the total risk was attributed to West African region, followed by 3.9%  
423 from South America and 6% from Northern Africa. However, when looking at periods of  
424 persistence suitability for Senegal, the risk distribution shifted and the proportion of risk  
425 attributed to Northern African regions, rose to 50.4%, followed by South America with  
426 41.5%. This outcome underlines the importance of understanding not only the geographic  
427 origin of importation risks but also the specific temporal and spatial context in which the  
428 potential introductions can occur. Focusing on introduction suitability risk, countries in the  
429 West and East African regions exhibited significant risks of dengue importation. Notably, the  
430 highest risks for these countries were associated with regions within Africa itself (Figure 5).

431

432

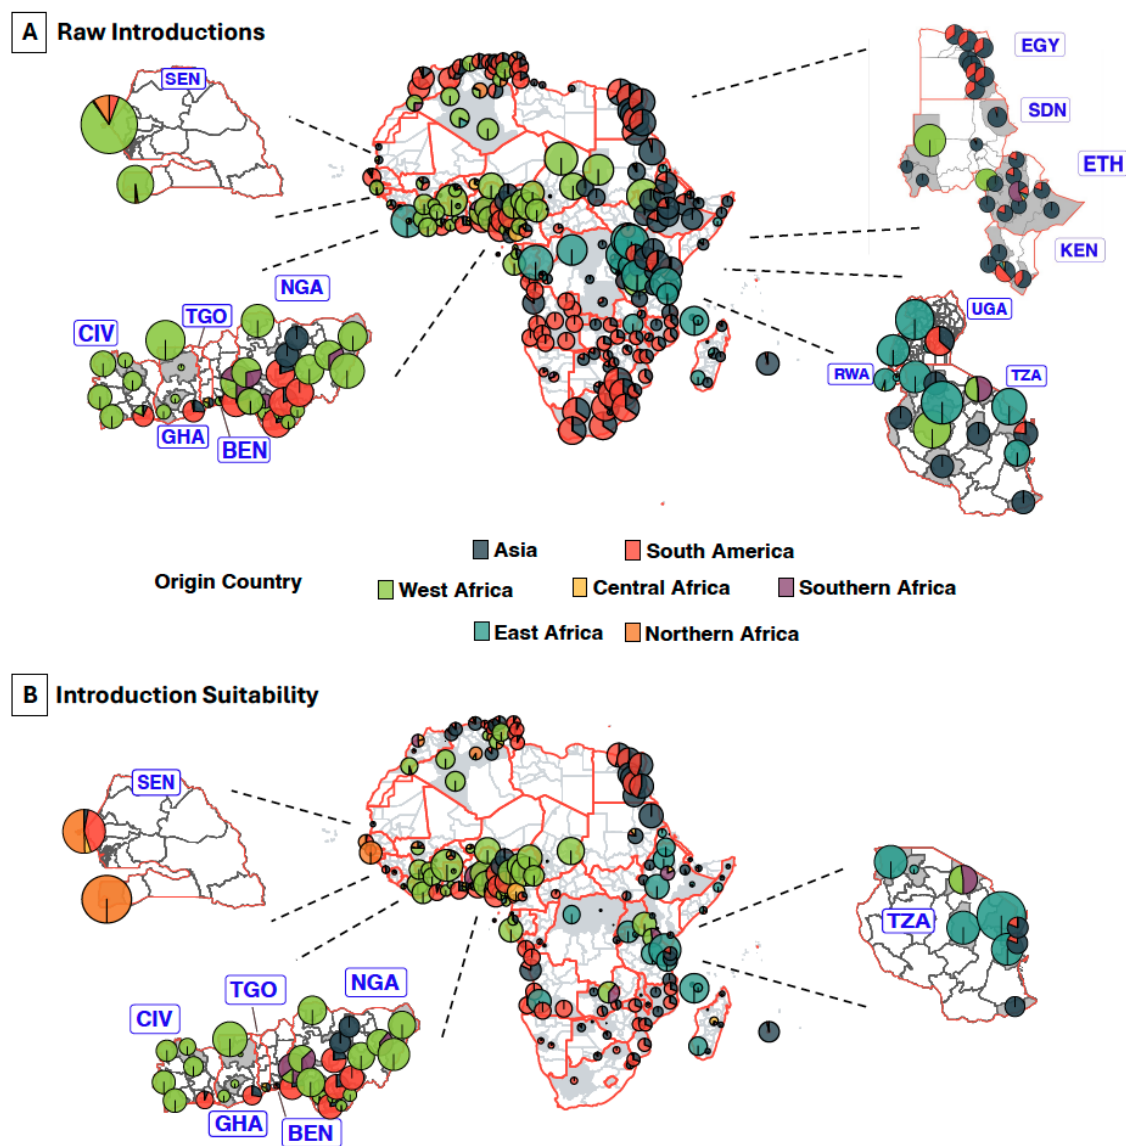

433

434 **Figure 4: Overall proportional risk of importation into African countries before and**  
435 **after adjusting for period of persistence suitability (transmission suitability greater than**  
436 **1). A) The proportion of risk from Asia, South America and African regions throughout the**  
437 **year for each district. The size of the pie charts are proportional to mean risk of importation**  
438 **across the year and the coloured pies represent the origin continent/region. We zoomed in on**  
439 **specific countries within the plot, namely: Ghana, Togo, Benin, Nigeria, Rwanda, Uganda,**  
440 **Senegal Tanzania, Egypt, Sudan, Ethiopia, and Kenya. B) The proportion of risk from**  
441 **Asia, South America and African regions across the year, for months with high persistence**  
442 **suitability. We zoomed in on specific countries within the plot, namely: Ghana, Togo, Benin,**

443 Nigeria, Senegal and Tanzania.

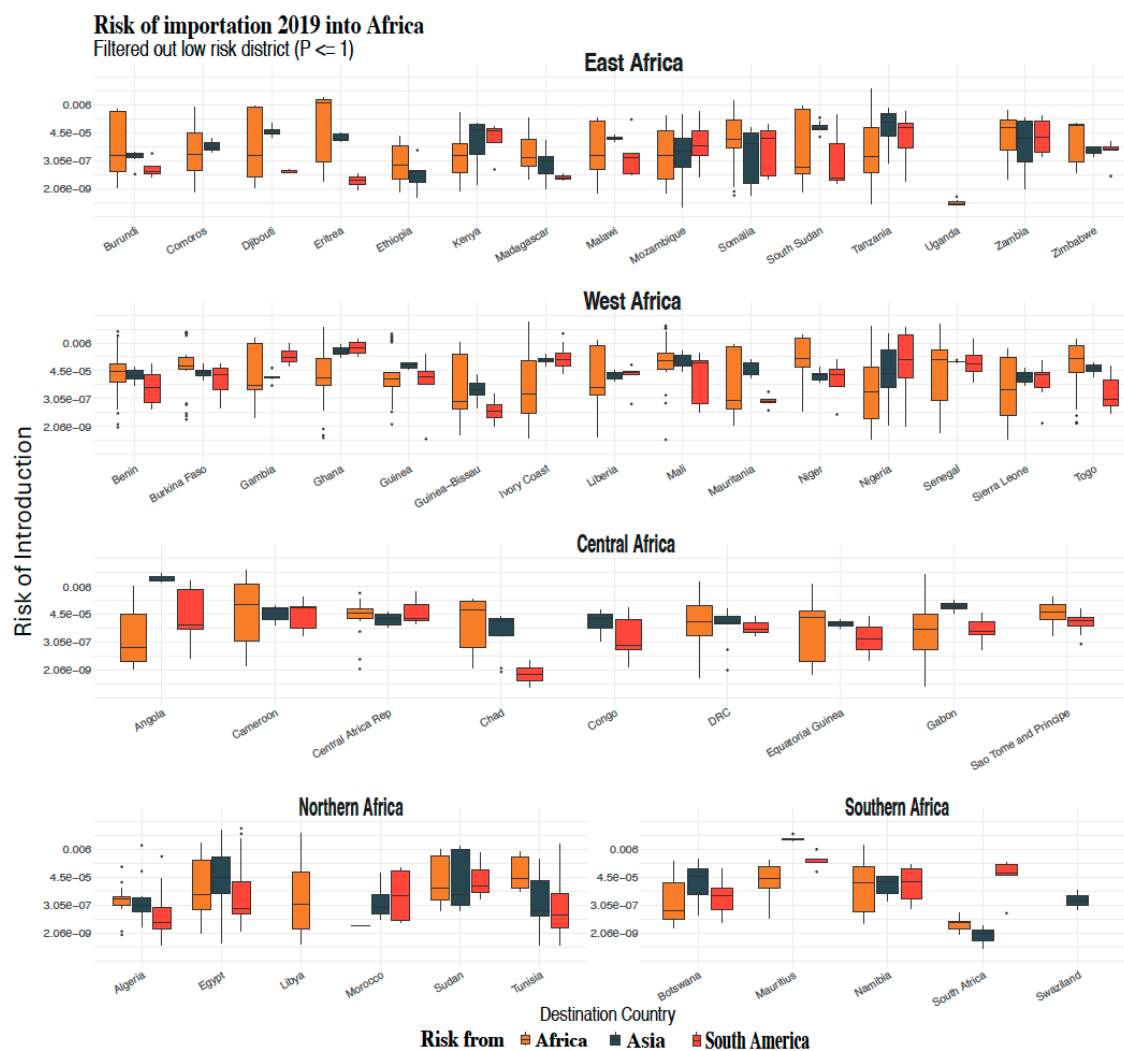

444

445 **Figure 5: Risk of Dengue importation into various African countries, grouped by**

446 **regions: East Africa, West Africa, Central Africa, Northern Africa and Southern**

447 **Africa.** Boxplot of risk across months and districts with high persistence suitability. Africa in

448 risk from Africa in orange, Asia in blue and South America in red.

449

## 450 Discussion

451 In this study, we investigated the temporal and spatial intersections between high risk of

452 introduction and heightened local transmission suitability of dengue in African countries. The

453 exploration of dengue introduction into Africa is imperative due to the potential implications

454 for onward transmission. To this end, we constructed an importation suitability map to depict

455 the spatial and temporal hotspots of dengue introduction and establishment into Africa from  
456 high incidence countries in Asia, Latin America, and regionally from other African countries.

457

458 We identified that the heterogeneity of the risk across Africa is dependent on the distribution  
459 of dengue activity across different provinces or states in the countries of high incidence and  
460 their connection to destination airports in Africa (see supplementary figure S8, p.9). Further,  
461 we found that seasonal variation plays a crucial role. For example, in India, major outbreaks  
462 tend to occur after the monsoon season and thus have a higher transmission suitability during  
463 these seasons (monsoon season spans from June to September) (33–35) and thus we also  
464 estimate a higher risk of dengue importation from India to African countries following the  
465 monsoon season (see supplementary figure S8, p.9).

466

467 This research presents an alternative risk assessment by considering modelled dengue  
468 transmission suitability (7) rather than reported incidence, compared to other studies using  
469 case incidence which might suffer from substantial underreporting (36–39). The correlation  
470 analyses revealed a robust association between transmission suitability and dengue cases for  
471 countries where high resolution spatiotemporal case records were available, with a significant  
472 correlation observed at a one-month lag (see supplementary figure S1, p.1). Our findings are  
473 consistent with previous research, demonstrating that 96% of municipalities in Brazil and  
474 95% of provinces in Thailand exhibited incidence dynamics with 0-3 months time delays  
475 relative to estimated transmission suitability (7). Our correlation further supports the utility of  
476 using transmission suitability as a proxy for local dengue circulation.

477

478 Increased international travel and trade have facilitated the global spread of dengue from  
479 endemic to non-endemic regions, by enabling the movement of infected individuals and  
480 mosquito vectors between regions (6–8,10). The risk flow results presented here highlight the  
481 substantial risks of dengue introduction into certain parts of the African continent from Asia,  
482 South America, or regionally from other African countries through human mobility. We show  
483 that the risk of importation to African countries is highly heterogeneous. The results produced  
484 by our model suggest that major airports in South Africa, Egypt, Morocco, Kenya, Seychelles  
485 and Mauritius, are potential hotspots for the importation of dengue-infected travellers from  
486 high-incidence countries. However, the analysis also revealed important geographical  
487 nuances: for example, the broader Eastern African region, and parts of Southern and Africa,  
488 are confronted with elevated risks of dengue importation from Asia, while Central, and

489 segments of Northern and Southern Africa are more susceptible to introductions from South  
490 America (albeit often not suitable introductions). This is consistent with a recent  
491 phylogeographic study which found that all four dengue serotypes were introduced on  
492 multiple occasions to Africa, primarily from South or Southeast Asia since the 1940s (40).  
493 This highlights the significance of our study in obtaining high-resolution and recent temporal  
494 and spatial trends for the vulnerability of Africa to dengue introductions.

495

496 In contrast, our analysis of the risk of importing dengue from within the continent reveal  
497 areas of the continent where a substantial portion of the risks tends to come from within the  
498 region, underscoring the importance of intra-continental transmission dynamics. This is  
499 estimated to be the major driver of cross-country introduction in West Africa, and to a lesser  
500 extent in East Africa. This is supported by recent phylogeographic reconstructions which  
501 showed frequent introductions and reintroductions of the dengue virus within the western  
502 African region, as well as similar patterns in the eastern part of the continent (40,41). While  
503 Asia represents the second largest contributor to dengue risk, particularly impacting the East,  
504 West and Central African regions, the internal risk within Africa remains a primary concern.  
505 To put this in context, Africa exhibits relatively similar or closely aligned spatial  
506 characteristics in transmission suitability across its regions and therefore, it is expected that  
507 intra-continental risk remains predominant. This spatial similarity reinforces the  
508 interconnectedness of African regions in the context of disease transmission dynamics. On  
509 the other hand, there is also a substantial contribution from Asia particularly in East Africa,  
510 and towards the island nation of Mauritius, indicating that these countries are vulnerable to  
511 introductions both from within the continent and from Asia.

512

513 It remains crucial not to disregard regions with high population density but that currently  
514 express low transmission suitability, such as Ethiopian highlands or high altitude regions of  
515 Tanzania. Despite their dense population, these regions have historically shown low  
516 transmission suitability values. However, with the potential impacts of future global climate  
517 change, these areas may become increasingly susceptible to local dengue outbreaks. By  
518 integrating appropriate travel models, this approach can be adapted to predict dengue risk  
519 under various climatic conditions, providing valuable insights for future public health  
520 planning.

521

522 To translate the high risks of introduction into the notion of introduction suitability, that is  
523 considering potential introductions that are highly likely to cause onward transmission in the  
524 destination countries, it was important to understand the specific temporal and spatial patterns  
525 of the risk flow estimates. The temporal analysis of estimated importation risks and local  
526 transmission suitability revealed the optimal times to conduct increased surveillance, as the  
527 times when the risks of introduction and the potential for transmission are simultaneously  
528 high. Therefore, the temporal synchrony between estimated introduction risks and  
529 transmission suitability has important implications for which viral introductions are predicted  
530 to have the ability to contribute to local outbreak risks.

531

532 Epidemiological and genomic surveillance are critical public health measures to mitigate  
533 disease burden, and also to understand the spread and evolution of pathogens. At present,  
534 there is no approved antiviral treatment for dengue and supportive care is the only option  
535 (17–19). However, two dengue vaccines have shown great promise (Takeda and Butantan  
536 vaccines) (20). Genomic surveillance can provide critical information about viral  
537 transmission landscape prior to upcoming dengue vaccine rollouts. To determine the optimal  
538 locations for conducting genomic surveillance in Africa, it is also important to have a  
539 quantitative understanding of the actual risk of a dengue virus epidemic at country level,  
540 particularly given limited resources to implement surveillance programs. This study's  
541 findings point to the fact that emphasis should be placed on targeted monitoring during  
542 periods when the likelihood of risks escalating into an outbreak is higher, and within areas  
543 prone to introductions during time of persistence suitability. In turn, in light of introduction  
544 risks, genomic surveillance for dengue enables public health officials to monitor the  
545 circulating serotypes while remaining vigilant for the emergence of novel strains or  
546 genotypes. In the particular case of dengue, introductions could lead to outbreaks with  
547 worsened disease outcomes in a population that has already been exposed to a different  
548 serotype of the virus, and depending on the temporal sequence of serotype circulation. This is  
549 a growing concern in Africa and elsewhere given the number of countries in which dengue is  
550 now well established and serotype co-circulation is becoming universal. Importantly, our  
551 modelling approach can also be used for other continents, namely Europe and North America  
552 where dengue epidemic activity is increasing.

553

554 This study should be interpreted in light of several limitations. First, this study presents  
555 relative introduction and establishment risks calculated from ecological, statistical, and

556 mathematical models but does not present direct estimates of the number of expected  
557 introductions. Further, due to paucity of genomic and traveller testing data the models  
558 presented here have yet to be validated. In countries that perform disease surveillance of  
559 incoming travellers, the history of travel of positive dengue cases could serve as validation  
560 data to this type of modelling study. Rapidly expanding volume of available dengue genomes  
561 will soon make it possible to reconstruct high resolution transmission dynamics to validate  
562 introduction models presented here. Additionally, the measure of transmission suitability  
563 used for the source locations does not account for specific control measures in place,  
564 potentially impacting the accuracy of the estimated dengue incidence. It also does not take  
565 into account the presence and abundance of mosquito vectors. Despite this limitation, the  
566 chosen transmission suitability index  $P$  seems to produce realistic estimates for dengue  
567 incidence in source locations, considering variations in testing and reporting practices  
568 globally. Thirdly, while our findings are founded upon the current travel networks, it is  
569 imperative to acknowledge the dynamic nature of travel patterns. Given the expansive reach  
570 of air travel and the transformative impact observed during the COVID-19 pandemic, we  
571 must remain vigilant to the possibility of shifts in dengue introduction risks. This is  
572 particularly relevant as more areas are becoming suitable for transmission of dengue.  
573 Furthermore, the connectivity between African countries is only captured here through air  
574 travel data, while the true connection between neighbouring countries would also be  
575 dependent on road travel networks and information about the porosity of borders, data which  
576 is much more difficult to obtain. Finally, models like the one employed in this study rely on  
577 air travel data and do not account for the role of trade in moving infected mosquitoes between  
578 countries (e.g. in tyres); this should be considered in future work.

579

580 In conclusion, this study provides valuable insights into the complex dynamics of dengue  
581 importation risks into Africa, while making a distinction as to the source of those potential  
582 introductions. The incorporation of estimated transmission suitability for dengue and  
583 population density in risk assessment enhances the accuracy of predictions. The temporal and  
584 spatial analyses highlight specific regions and times that warrant intensified surveillance and  
585 public health interventions given the likelihood of potential introductions that would lead to  
586 local outbreaks. These findings contribute to a more nuanced understanding of global dengue  
587 dynamics, and importantly focus on informing further surveillance on the Africa continent  
588 and globally.

## 589 Data Availability Statement

590 Proprietary air travel data are commercially available from the International Air Transport  
591 Association (<https://www.iata.org/>) databases. Transmission suitability (index P) estimates  
592 are available at <https://doi.org/10.6084/m9.figshare.21502614>. Risk estimates computed from  
593 this study can be found at:

594 [https://github.com/CERI-KRISP/Dengue\\_Importation\\_Risk\\_Modelling.git](https://github.com/CERI-KRISP/Dengue_Importation_Risk_Modelling.git)

595

## 596 Declaration of interests

597 We declare no competing interests.

598

## 599 Contributors

600

601 H.T. and J.P. conceptualised and designed the study. J.P. analysed data, executed all primary  
602 data visualizations, and wrote the original draft. V.C. accessed the travel data. Y.R. collected  
603 and curated epidemiological data. M.D., T.d.O, V.C. and M.U.G.K. interpreted data. J.L. and  
604 J.L.-H.T. contributed to data analysis and visualisation. C.B. and T.d.O acquired funding for  
605 this project. H.T., M.D., T.d.O supervised the study. All authors had full access to all the data  
606 in this study. All authors reviewed and edited the final draft. All authors had final  
607 responsibility for the decision to submit for publication.

## 608 Acknowledgements

609 CERi and KRISP are supported in part by grants from the Rockefeller Foundation (HTH  
610 017), the National Institute of Health USA (U01 AI151698) for the United World Antiviral  
611 Research Network (UWARN), and the INFORM Africa project through IHVN (U54  
612 TW012041), Global Health EDCTP3 Joint Undertaking and its members as well as Bill &  
613 Melinda Gates Foundation (101103171), European Union's Horizon Europe Research and  
614 Innovation Programme (101046041), the Health Emergency Preparedness and Response  
615 Umbrella Program (HEPR Program), managed by the World Bank Group (TF0B8412), the  
616 Medical Research Foundation (MRF-RG-ICCH-2022-100069), and the Wellcome Trust  
617 (228186/Z/23/Z). M.U.G.K. acknowledges funding from The Rockefeller Foundation (PC-



618 2022-POP-005), Google.org, the Oxford Martin School Programmes in Pandemic Genomics  
619 & Digital Pandemic Preparedness, European Union's Horizon Europe programme projects  
620 MOOD (#874850, also V.C.) and E4Warning (#101086640), a Branco Weiss Fellowship and  
621 Wellcome Trust grants 225288/Z/22/Z, 226052/Z/22/Z & 228186/Z/23/Z, United Kingdom  
622 Research and Innovation (#APP8583) and the Medical Research Foundation (MRF-RG-  
623 ICCH-2022-100069).. J.L.-H.T. is supported by a Yeotown Scholarship from New College,  
624 University of Oxford. V.C. acknowledges funding from Horizon Europe grants ESCAPE  
625 (101095619) and VERDI (101045989); EU Horizon 2020 grant MOOD (H2020-874850,  
626 paper 874850, also to M.U.G.K.).The content and findings reported herein are the sole  
627 deduction, view and responsibility of the researcher/s and do not necessarily reflect the  
628 official position and sentiments of the funding agencies.

629

## 630 Funding Statement

631 The funders had no role in data collection, analysis, interpretation of data, writing of the  
632 manuscript, or the decision to submit it for publication.

633

634

635

636

637

638

639

640

641 **Supplementary Appendix**

642 **Figure S1**

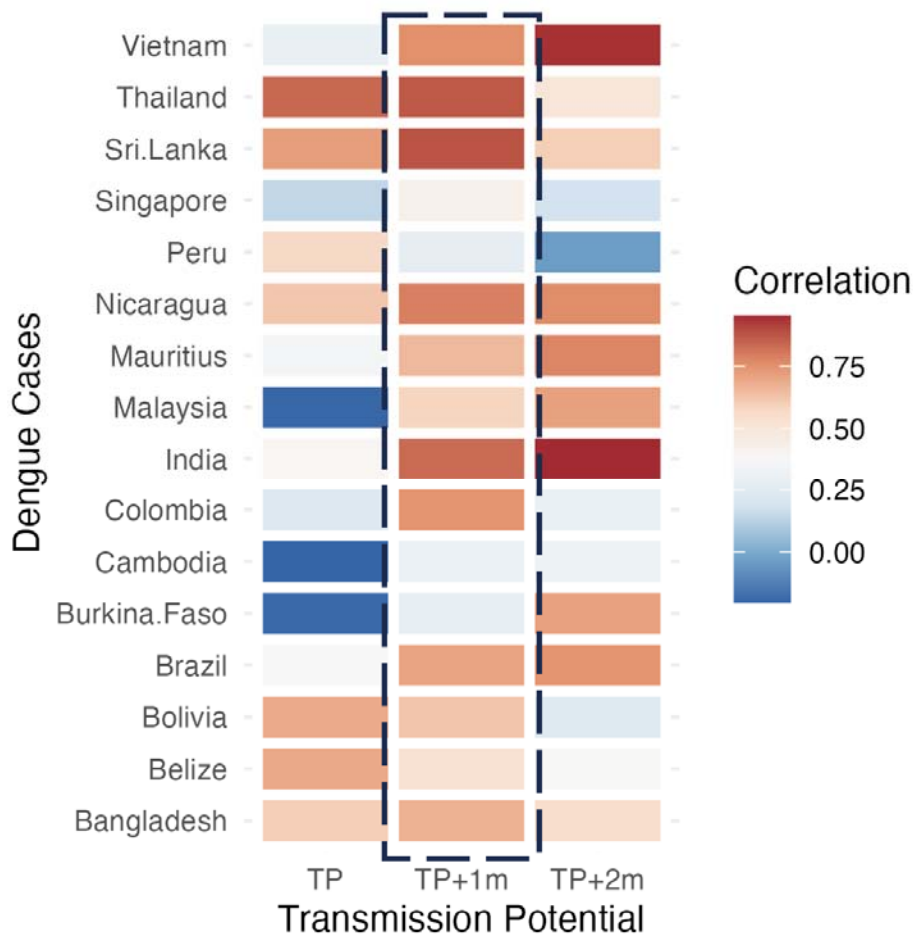

643

644

645 Figure S1: Temporal correlation between monthly dengue cases from different origin  
646 countries to Transmission potential without and with 1 and 2 months lag (p-values ranging  
647 from 0.001 to 0.65).

648 Figure S2

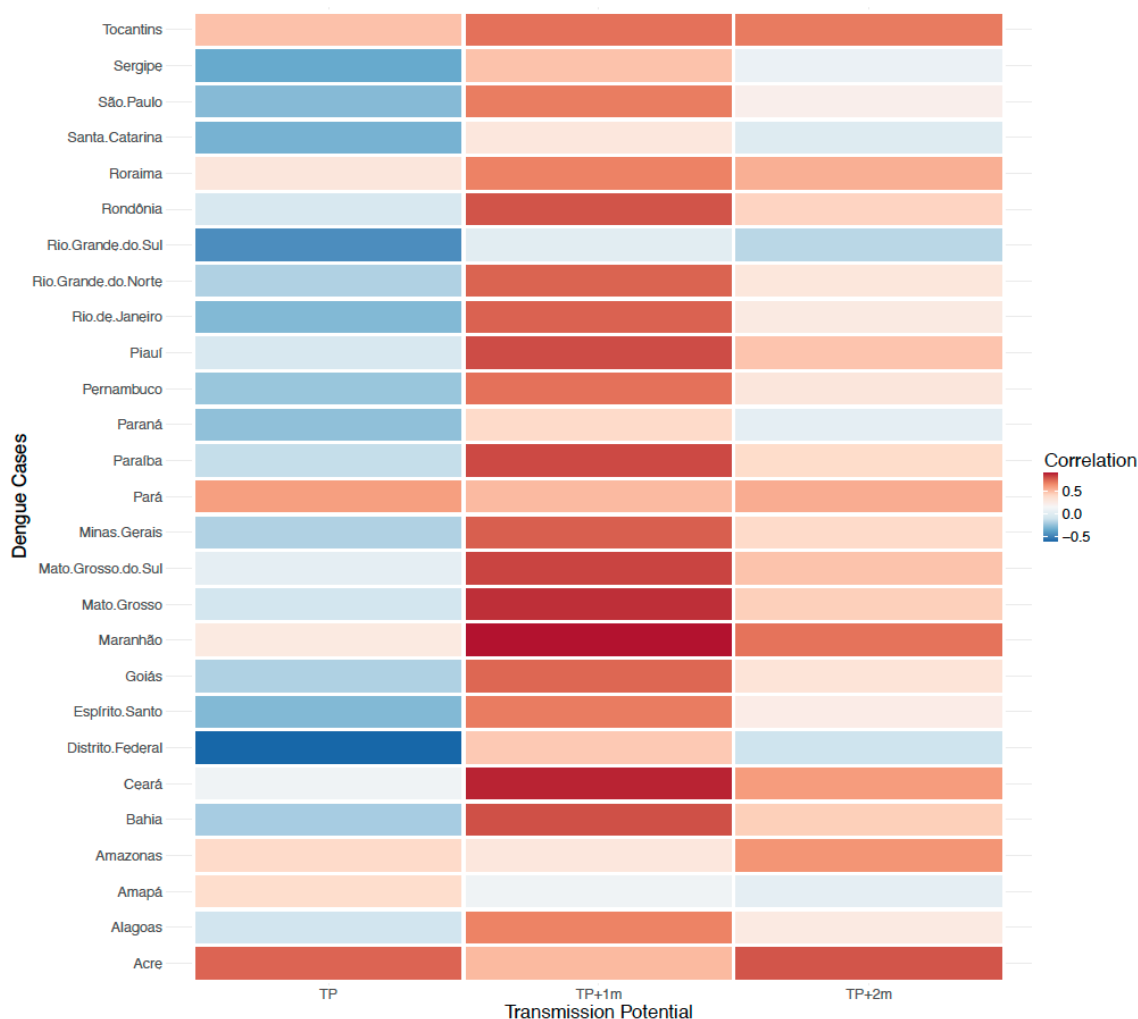

649

650 Figure S2: Temporal correlation between monthly dengue cases from different states in Brazil  
651 to Transmission suitability without and with 1 and 2 months lag. The p-values for the  
652 correlations ranged from 0.0000103 to 0.671.

653

654 Figure S3

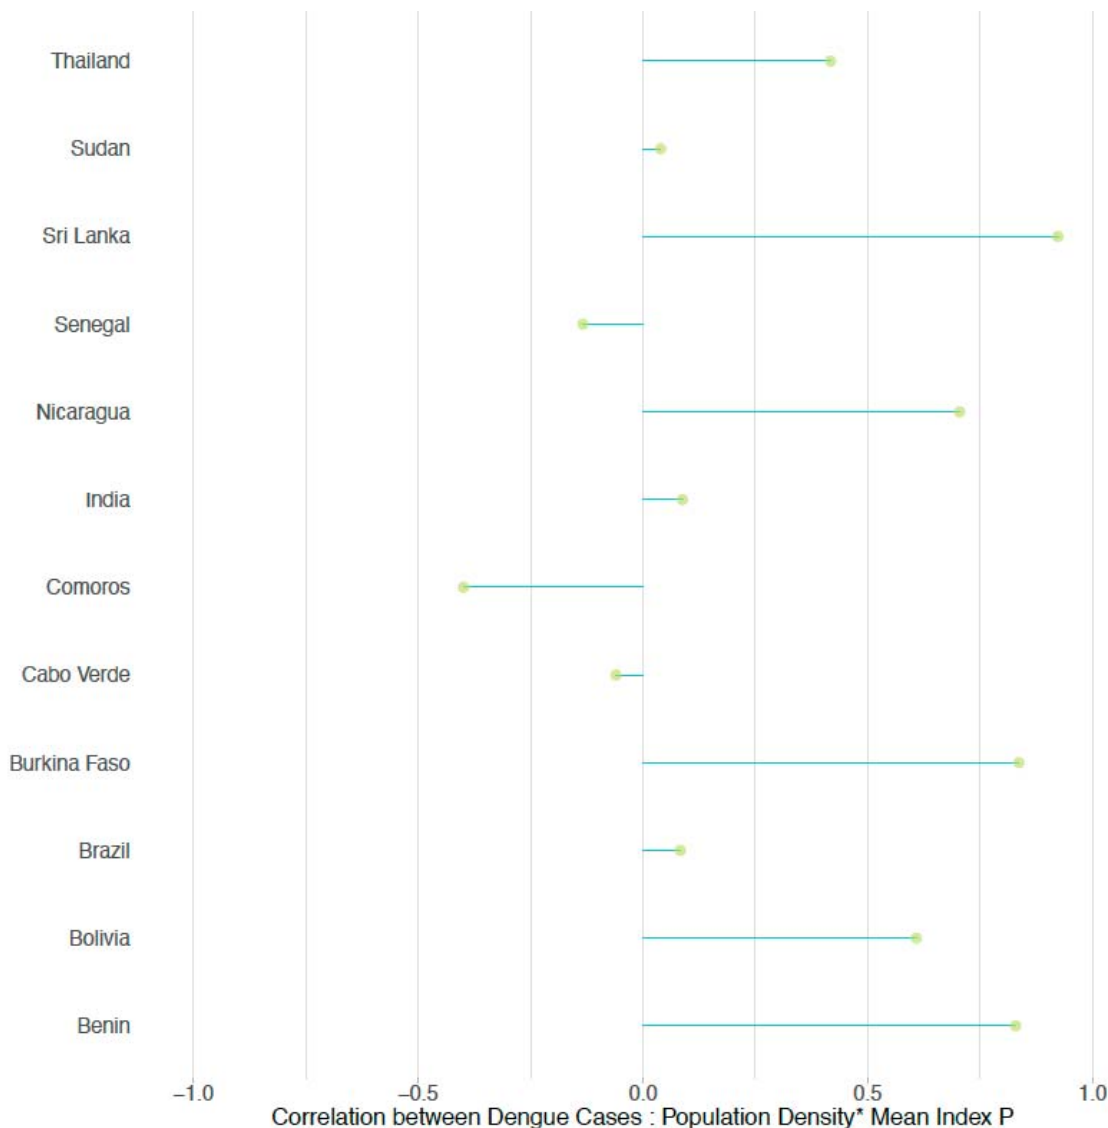

655  
656  
657  
658  
659  
660  
661  
662  
663  
664  
665  
666  
667  
668

Figure S3: Correlation between Dengue Cases and Population Density multiplied by Mean Index P: This plot illustrates the relationship between the number of dengue cases and the interaction of population density with the mean transmission potential (index P).

669 **Figure S4**

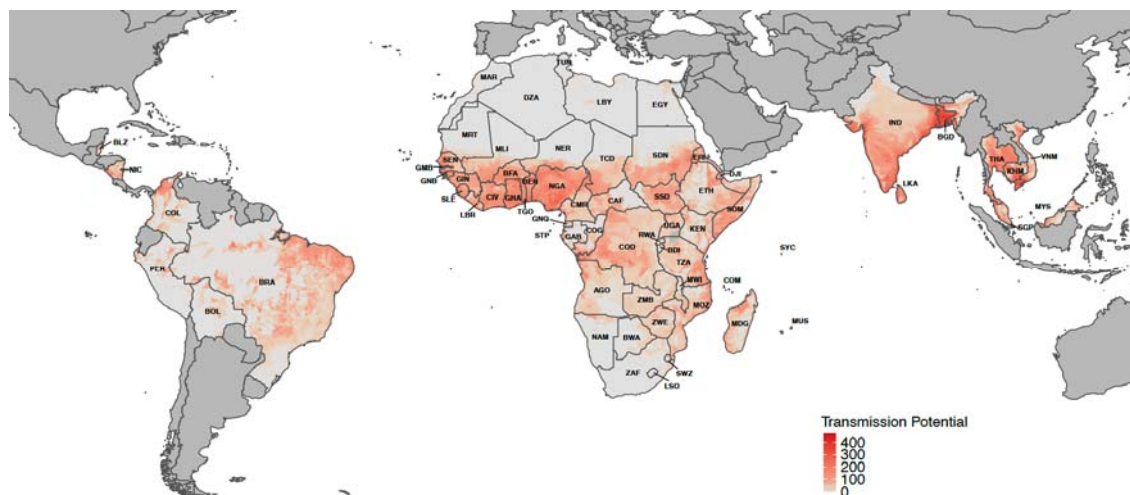

670  
671 Figure S4: The figure shows the composite index of transmission suitability multiplied by  
672 Population Density ( $t_i$ ), used in this study. Here we only show for the 14 countries of high  
673 incidence and the African continent, i.e., only for the origin and destination countries used in  
674 this study.

675 **Figure S5**

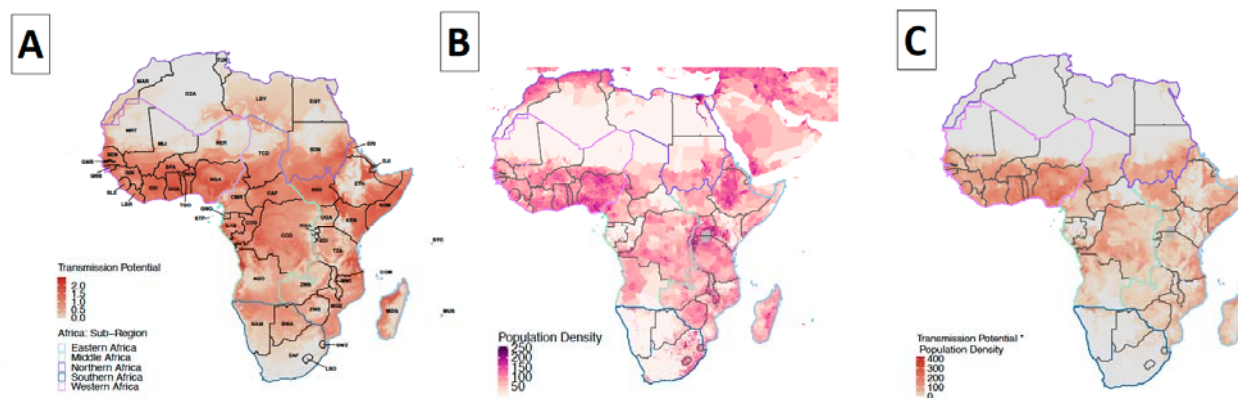

677  
678 Figure S5: A) The map background uniformly represents the transmission suitability of  
679 dengue (mean index  $P$ ) across Africa, with the continent divided into five distinct regions. B)  
680 The population density across Africa and C) Transmission suitability multiplied by  
681 population density for Africa. We also divide the African continent into 5 regions: Eastern  
682 (light blue), Middle (Green), Northern (Purple), Southern (dark blue) and Western Africa  
683 (pink) which are outlined on the map.

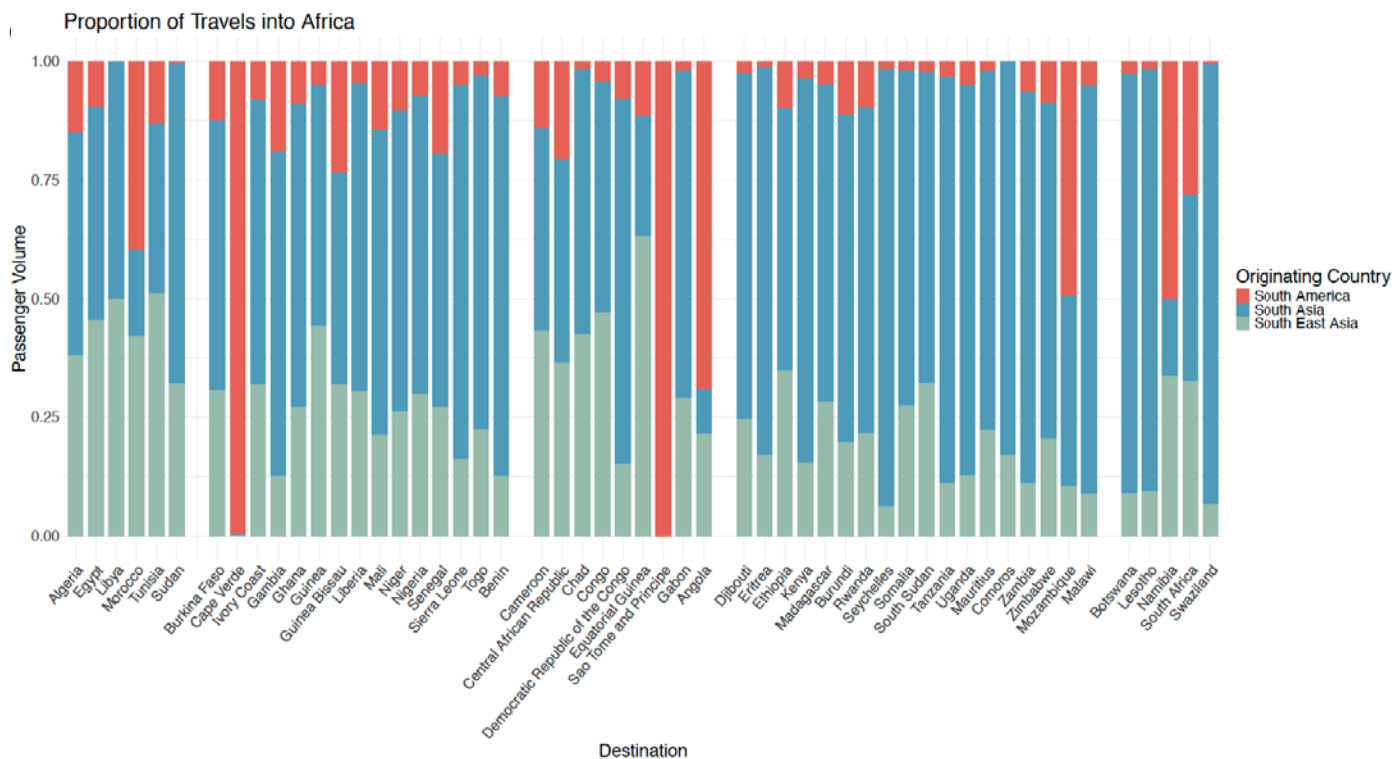

685

686 Figure S6: This figure depicts the proportion of travel volumes from Asia, Southeast Asia,  
687 and South America to African countries over the course of one year.

688

689 Figure S7

690 **A**

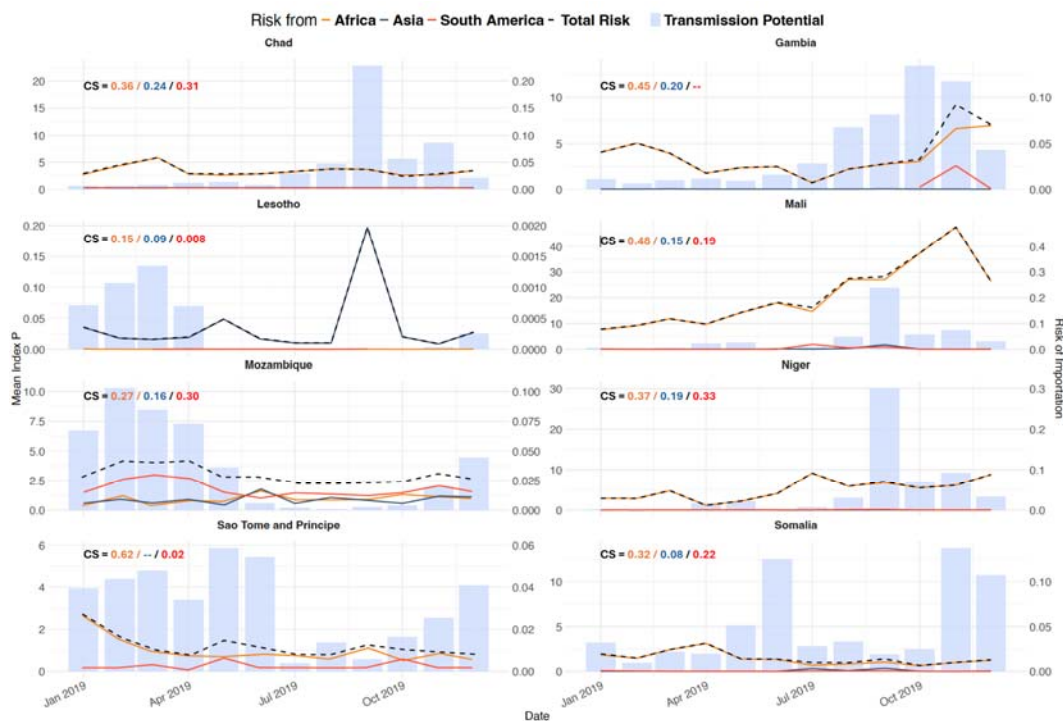

691

692

693

**B**

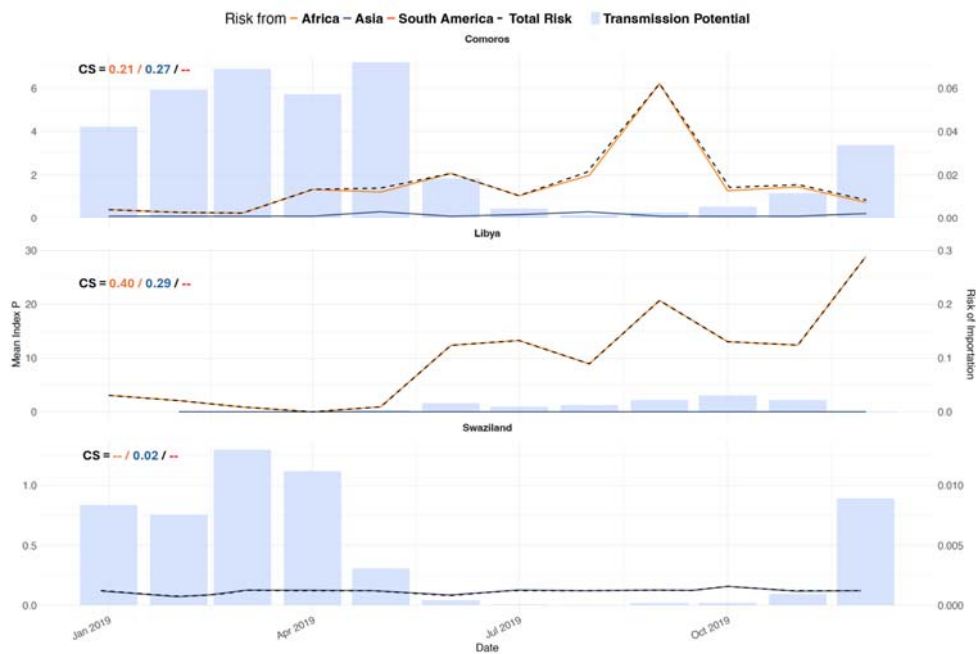

694

695

696

697

**C**

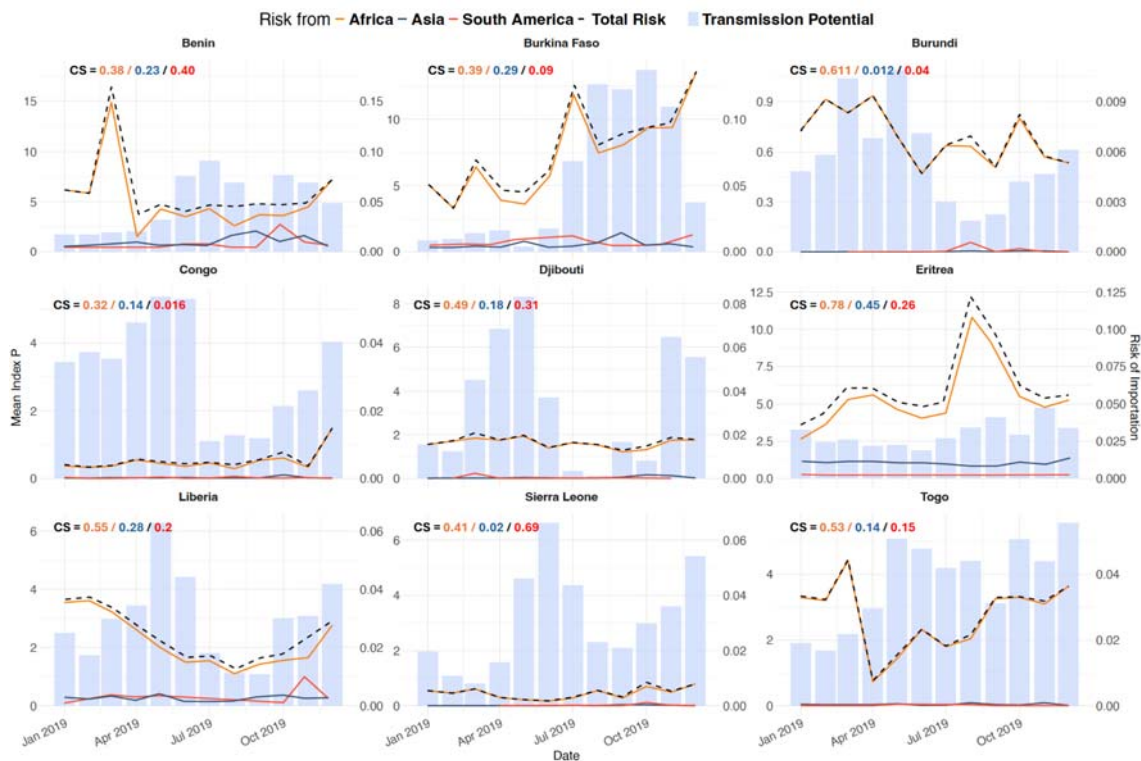

698  
699

700

**D**

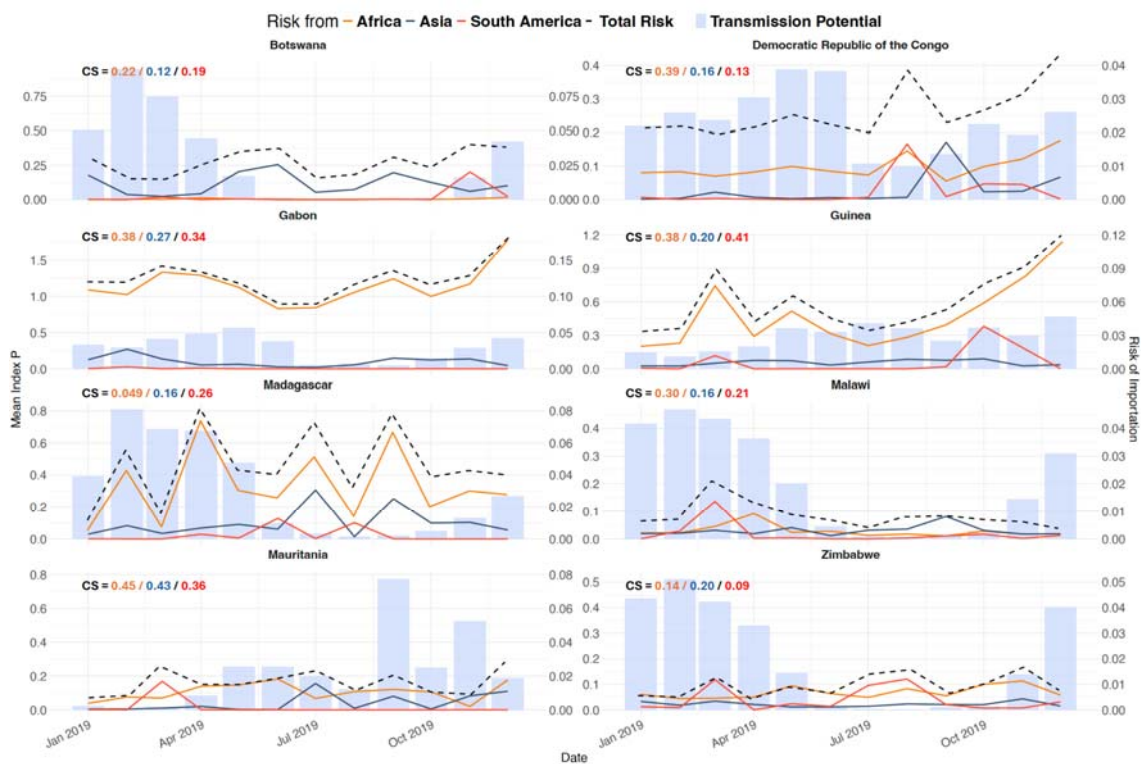

701  
702

703

**E**



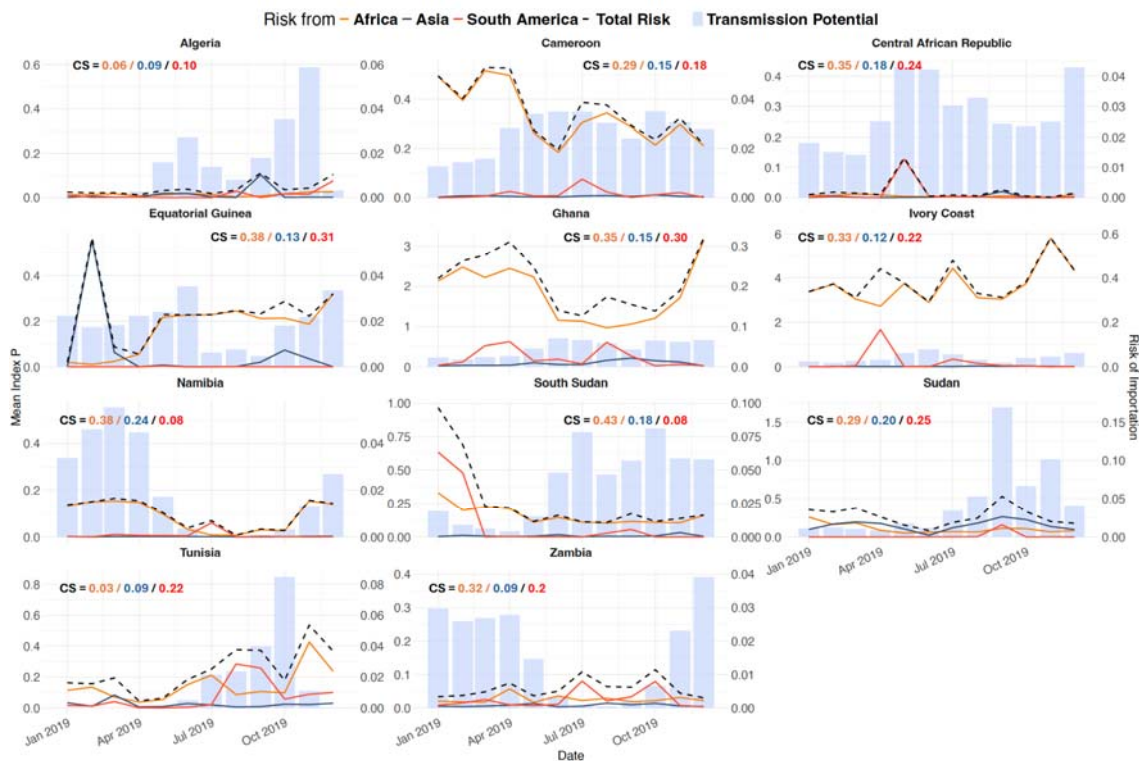

704  
705  
706  
707  
708  
709  
710  
711  
712  
713  
714  
715

Figure S7: Time-varying risk of introduction into African countries in 2019 from Asia (blue line) and South America (red line) along with time-varying transmission suitability index nationally. The combined risk is represented by the black dotted line. Panel A) Chad, Gambia, Lesotho, Mali, Mozambique, Niger, Sao Tome and Principe, Somalia. B) Comoros, Libya, Swaziland. C) Benin, Burkina Faso, Burundi, Congo, Djibouti, Eritrea, Guinea Bissau, Liberia, Sierra Leone. D) Botswana, DRC, Gabon, Guinea, Madagascar, Malawi, Mauritania, Zimbabwe. E) Algeria, Cameroon, Central African Republic, Equatorial Guinea, Ghana, Ivory Coast, Namibia, South Sudan, Sudan and Tunisia.

716 Figure S8

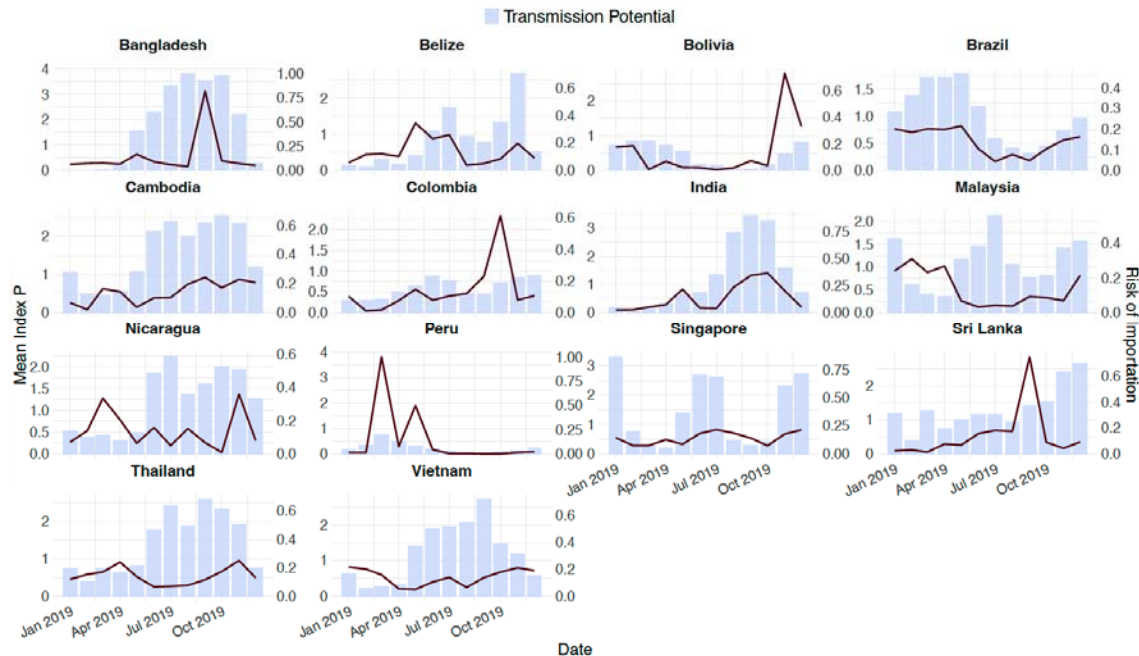

717  
718  
719  
720  
721  
722  
723  
724  
725  
726

Figure S8: Risk of Exportation from countries of high incidence (n=14) considered in this study overlaid across their respective transmission suitability across the year.

Table S1: Annual risk of dengue importation into various countries and the cosine similarity between the risk of importation and the local transmission suitability. The cosine similarity values highlight the level of synchrony between the timing of importation risk and transmission suitability.

| Destination Country | Africa           |                   | Asia             |                   | South America    |                   |
|---------------------|------------------|-------------------|------------------|-------------------|------------------|-------------------|
|                     | Mean Annual Risk | Cosine Similarity | Mean Annual Risk | Cosine Similarity | Mean Annual Risk | Cosine Similarity |
| Algeria             | 8.58793E-05      | 0.058328731       | 4.75473E-05      | 0.092625456       | 0.000128602      | 0.099100722       |
| Angola              | 0.000871512      | 0.190891518       | 0.001993496      | 0.452737102       | 0.000366653      | 0.274175799       |
| Benin               | 0.003930211      | 0.389007711       | 3.47791E-06      | 0.228437938       | 1.68932E-06      | 0.396225317       |
| Botswana            | 3.51387E-05      | 0.215154412       | 2.13379E-05      | 0.117967166       | 2.78784E-05      | 0.194705357       |
| Burkina Faso        | 0.006646177      | 0.385177331       | 4.09467E-06      | 0.286753612       | 1.88572E-06      | 0.087784552       |
| Burundi             | 0.000837797      | 0.611547737       | 2.34401E-06      | 0.011767048       | 1.54542E-07      | 0.642582104       |
| Cameroon            | 0.008447926      | 0.295619467       | 2.95063E-05      | 0.153247624       | 2.19541E-05      | 0.181770533       |

|                                  |             |             |             |             |             |             |
|----------------------------------|-------------|-------------|-------------|-------------|-------------|-------------|
| Central African Republic         | 0.000218083 | 0.353990993 | 3.91664E-05 | 0.177757447 | 9.86087E-06 | 0.23872773  |
| Chad                             | 0.000274719 | 0.369497313 | 1.53444E-06 | 0.238037186 | 2.49248E-08 | 0.316180995 |
| Comoros                          | 0.001294683 | 0.209741644 | 4.3464E-07  | 0.27279957  | -           | -           |
| Congo                            | 0.000586055 | 0.324397585 | 4.35204E-06 | 0.14248563  | 1.69903E-05 | 0.016785495 |
| Democratic Republic of the Congo | 0.001303986 | 0.393800624 | 8.2923E-06  | 0.162595074 | 7.14804E-06 | 0.132166652 |
| Djibouti                         | 0.001532898 | 0.494685428 | 7.89399E-06 | 0.187134913 | 3.04414E-08 | 0.316606702 |
| Egypt                            | 0.000936993 | 0.099743346 | 0.001444715 | 0.310977716 | 0.003022812 | 0.146581553 |
| Equatorial Guinea                | 0.001953211 | 0.381572116 | 0.00014837  | 0.130329526 | 4.96267E-06 | 0.316211807 |
| Eritrea                          | 0.008478351 | 0.777500496 | 9.86055E-07 | 0.4451418   | 3.4245E-08  | 0.26141747  |
| Ethiopia                         | 0.005274767 | 0.150157274 | 0.000581153 | 0.00676671  | 0.000591047 | 0.194017404 |
| Gabon                            | 0.007230396 | 0.375102928 | 8.65829E-06 | 0.27379809  | 4.1067E-06  | 0.336726972 |
| Gambia                           | 0.003186559 | 0.458145605 | 8.03388E-06 | 0.201716686 | 0.005653556 | -           |
| Ghana                            | 0.00955636  | 0.351897748 | 0.000170407 | 0.150931437 | 5.47708E-05 | 0.295709752 |
| Guinea                           | 0.003630093 | 0.383805206 | 1.21755E-05 | 0.19985256  | 1.44646E-07 | 0.407950221 |
| Guinea-Bissau                    | 0.001072629 | 0.457622528 | -           | -           | -           | -           |
| Ivory Coast                      | 0.020974173 | 0.325717678 | 6.57972E-05 | 0.12354295  | 0.00107263  | 0.215319706 |
| Kenya                            | 0.005731245 | 0.036114895 | 0.000988367 | 0.069622909 | 0.001494575 | 0.154600402 |
| Lesotho                          | 3.56208E-07 | 0.15289133  | 1.02055E-05 | 0.094732527 | 3.14016E-07 | 0.0085123   |
| Liberia                          | 0.002223941 | 0.552593253 | 3.04256E-06 | 0.280318149 | 9.93E-08    | 0.24756365  |
| Libya                            | 0.015078074 | 0.398317605 | 2.5673E-07  | 0.299733067 | -           | -           |
| Madagascar                       | 0.002337154 | 0.049387505 | 2.94347E-05 | 0.168038552 | 4.71908E-07 | 0.260730525 |
| Malawi                           | 0.000321708 | 0.300413857 | 5.119E-06   | 0.158354803 | 1.16176E-06 | 0.211343472 |
| Mali                             | 0.015824618 | 0.480114221 | 3.1599E-05  | 0.151662472 | 2.32159E-06 | 0.191559015 |

|                       |             |             |             |             |             |             |
|-----------------------|-------------|-------------|-------------|-------------|-------------|-------------|
| Mauritania            | 0.001212314 | 0.455332323 | 1.61734E-05 | 0.438664787 | 6.37599E-07 | 0.364489628 |
| Mauritius             | 9.70938E-05 | 0.130737683 | 0.001849354 | 0.437307709 | 5.49418E-05 | 0.183208942 |
| Morocco               | 0.003680877 | 0.032089383 | 0.000168915 | 0.062747594 | 0.001201956 | 0.08396825  |
| Mozambique            | 8.16851E-05 | 0.265098023 | 1.54534E-05 | 0.158473509 | 2.75049E-05 | 0.302516564 |
| Namibia               | 0.001218896 | 0.379170333 | 4.50418E-06 | 0.243176458 | 2.5075E-05  | 0.084827259 |
| Niger                 | 0.006007527 | 0.373429595 | 8.00839E-06 | 0.196077917 | 2.6152E-08  | 0.332386386 |
| Nigeria               | 0.002684687 | 0.175464736 | 0.000385632 | 0.129285607 | 0.003900263 | 0.166146102 |
| Rwanda                | 0.001544029 | 0.534617381 | 7.87532E-05 | 0.082448877 | 7.02317E-06 | 0.178981757 |
| Sao Tome and Principe | 0.000170228 | 0.616702222 | -           | -           | 1.15721E-05 | 0.02254764  |
| Senegal               | 0.022102646 | 0.354560297 | 2.50289E-05 | 0.078299913 | 0.00144425  | 0.090820404 |
| Sierra Leone          | 0.000356306 | 0.414192321 | 4.02423E-06 | 0.020192397 | 1.28825E-08 | 0.690094408 |
| Somalia               | 0.001317879 | 0.315245767 | 1.73787E-05 | 0.082469611 | 3.80101E-05 | 0.21881435  |
| South Africa          | 0.005954194 | 0.123350931 | 0.001192238 | 0.102518352 | 0.003235918 | 0.100622363 |
| South Sudan           | 0.001536735 | 0.43148707  | 1.00949E-05 | 0.183587161 | 0.001606043 | 0.081165463 |
| Sudan                 | 0.001331234 | 0.292155652 | 0.000214187 | 0.196758845 | 0.000140615 | 0.248052223 |
| Swaziland             | 0           | -           | 5.24909E-07 | 0.024587963 | 1.42E-08    | -           |
| Tanzania              | 0.004724326 | 0.252885566 | 6.78168E-05 | 0.121105075 | 3.23203E-05 | 0.161858017 |
| Togo                  | 0.002531176 | 0.526981151 | 4.93146E-06 | 0.141542277 | 5.21319E-06 | 0.274707511 |
| Tunisia               | 0.00353866  | 0.030401063 | 9.32356E-05 | 0.085759411 | 0.00045281  | 0.223887708 |
| Uganda                | 0.006595113 | 0.294246386 | 0.00036009  | 0.174638736 | 0.00022749  | 0.139245862 |
| Zambia                | 0.000214647 | 0.324477152 | 3.77893E-05 | 0.088560608 | 1.53366E-05 | 0.200134605 |
| Zimbabwe              | 0.00058781  | 0.146458059 | 1.07493E-05 | 0.201679279 | 1.38175E-05 | 0.094483847 |

## 728 References

- 729 1. Gubler DJ. Dengue and dengue hemorrhagic fever. *Clin Microbiol Rev.*  
730 1998;11(3):480–96.
- 731 2. Paz-Bailey G, Adams LE, Deen J, Anderson KB, Katzelnick LC. Dengue. *The*  
732 *Lancet.* 2024 Feb 17;403(10427):667–82.
- 733 3. Brady OJ, Gething PW, Bhatt S, Messina JP, Brownstein JS, Hoen AG, et al.  
734 Refining the global spatial limits of dengue virus transmission by evidence-based  
735 consensus. 2012;
- 736 4. Stanaway JD, Shepard DS, Undurraga EA, Halasa YA, Coffeng LE, Brady OJ, et al.  
737 The global burden of dengue: an analysis from the Global Burden of Disease Study 2013.  
738 *Lancet Infect Dis.* 2016;16(6):712–23.
- 739 5. Bhatt S, Gething PW, Brady OJ, Messina JP, Farlow AW, Moyes CL, et al. The  
740 global distribution and burden of dengue. *Nature.* 2013 Apr;496(7446):504–7.
- 741 6. Murray NEA, Quam MB, Wilder-Smith A. Epidemiology of dengue: past, present  
742 and future prospects. *Clin Epidemiol.* 2013;299–309.
- 743 7. Nakase T, Giovanetti M, Obolski U, Lourenço J. Global transmission suitability maps  
744 for dengue virus transmitted by *Aedes aegypti* from 1981 to 2019. *Sci Data.* 2023 May  
745 12;10(1):275.
- 746 8. Yang X, Quam MBM, Zhang T, Sang S. Global burden for dengue and the evolving  
747 pattern in the past 30 years. *J Travel Med.* 2021 Dec 1;28(8):taab146.
- 748 9. Kraemer MU, Sinka ME, Duda KA, Mylne AQ, Shearer FM, Barker CM, et al. The  
749 global distribution of the arbovirus vectors *Aedes aegypti* and *Ae. albopictus*. *elife.*  
750 2015;4:e08347.
- 751 10. Gubler DJ. Dengue, urbanization and globalization: the unholy trinity of the 21st  
752 century. *Trop Med Health.* 2011;39(4SUPPLEMENT):S3–11.
- 753 11. Morin CW, Comrie AC, Ernst K. Climate and dengue transmission: evidence and  
754 implications. *Environ Health Perspect.* 2013;121(11–12):1264–72.
- 755 12. Khan W, Zakai HA, Khan K, Kausar S, Aqeel S. Discriminating clinical and  
756 biological features in malaria and dengue patients. *J Arthropod-Borne Dis.*  
757 2018;12(2):108.
- 758 13. Nyenke CU, Nnokam BA, Esiere RK, Nwalozie R. Dengue Fever: Etiology,  
759 Diagnosis, Prevention and Treatment. *Asian J Res Infect Dis.* 2023;14(1):26–33.
- 760 14. Bosire C, Mutuku F, Ndenga B, Nzaro M, Mwendwa K, LaBeaud AD. A narrative

- 761 review of dengue fever infection and epidemic activity in Kenya (2010 to 2020). *PAMJ -*  
762 *One Health* [Internet]. 2023 Oct 16 [cited 2024 Mar 19];12(10). Available from:  
763 <https://www.one-health.panafrican-med-journal.com/content/article/12/10/full>
- 764 15. Gainor EM, Harris E, LaBeaud AD. Uncovering the Burden of Dengue in Africa:  
765 Considerations on Magnitude, Misdiagnosis, and Ancestry. *Viruses*. 2022 Feb;14(2):233.
- 766 16. WHO Afro Region. *Weekly Epidemiological Record*, 2023, vol.78. *Wkly Epidemiol*  
767 *Rec*. 2023;78(22):279–86.
- 768 17. Halstead SB. *Global Perspectives on Dengue Research*. 2000;
- 769 18. Wilder-Smith A, Gubler DJ, Weaver SC, Monath TP, Heymann DL, Scott TW.  
770 Epidemic arboviral diseases: priorities for research and public health. *Lancet Infect Dis*.  
771 2017;17(3):e101–6.
- 772 19. Ryan SJ, Carlson CJ, Mordecai EA, Johnson LR. Global expansion and redistribution  
773 of Aedes-borne virus transmission risk with climate change. *PLoS Negl Trop Dis*.  
774 2019;13(3):e0007213.
- 775 20. Charu V, Zeger S, Gog J, Bjørnstad ON, Kissler S, Simonsen L, et al. Human  
776 mobility and the spatial transmission of influenza in the United States. *PLoS Comput*  
777 *Biol*. 2017;13(2):e1005382.
- 778 21. Merler S, Ajelli M. The role of population heterogeneity and human mobility in the  
779 spread of pandemic influenza. *Proc R Soc B Biol Sci*. 2010;277(1681):557–65.
- 780 22. Bogoch II, Brady OJ, Kraemer MUG, German M, Creatore MI, Brent S, et al.  
781 Potential for Zika virus introduction and transmission in resource-limited countries in  
782 Africa and the Asia-Pacific region: a modelling study. *Lancet Infect Dis*. 2016 Nov  
783 1;16(11):1237–45.
- 784 23. Kraemer MU, Hill V, Ruis C, Dellicour S, Bajaj S, McCrone JT, et al. Spatiotemporal  
785 invasion dynamics of SARS-CoV-2 lineage B. 1.1. 7 emergence. *Science*.  
786 2021;373(6557):889–95.
- 787 24. Tegally H, Wilkinson E, Tsui JLH, Moir M, Martin D, Brito AF, et al. Dispersal  
788 patterns and influence of air travel during the global expansion of SARS-CoV-2 variants  
789 of concern. *Cell*. 2023;186(15):3277–90.
- 790 25. Soriano-Paños D, Arias-Castro JH, Reyna-Lara A, Martínez HJ, Meloni S, Gómez-  
791 Gardeñes J. Vector-borne epidemics driven by human mobility. *Phys Rev Res*.  
792 2020;2(1):013312.
- 793 26. Stoddard ST, Morrison AC, Vazquez-Prokopec GM, Paz Soldan V, Kochel TJ, Kitron  
794 U, et al. The role of human movement in the transmission of vector-borne pathogens.

- 795 PLoS Negl Trop Dis. 2009 Jul 21;3(7):e481.
- 796 27. Liu-Helmersson J, Stenlund H, Wilder-Smith A, Rocklöv J. Vectorial Capacity of  
797 *Aedes aegypti*: Effects of Temperature and Implications for Global Dengue Epidemic  
798 Potential. PLOS ONE. 2014 Mar 6;9(3):e89783.
- 799 28. Ebi KL, Nealon J. Dengue in a changing climate. *Environ Res.* 2016;151:115–23.
- 800 29. Mordecai EA, Cohen JM, Evans MV, Gudapati P, Johnson LR, Lippi CA, et al.  
801 Detecting the impact of temperature on transmission of Zika, dengue, and chikungunya  
802 using mechanistic models. *PLoS Negl Trop Dis.* 2017 Apr 27;11(4):e0005568.
- 803 30. Obolski U, Perez PN, Villabona-Arenas CJ, Thézé J, Faria NR, Lourenço J. MVSE:  
804 An R package that estimates a climate-driven mosquito-borne viral suitability index.  
805 *Methods Ecol Evol.* 2019;10(8):1357–70.
- 806 31. Global Administrative Areas. GADM Database. GADM Database Glob Adm Areas  
807 [Internet]. 2019; Available from: [www.gadm.org](http://www.gadm.org).
- 808 32. Gilbert M, Pullano G, Pinotti F, Valdano E, Poletto C, Boëlle PY, et al. Preparedness  
809 and vulnerability of African countries against importations of COVID-19: a modelling  
810 study. *The Lancet.* 2020 Mar 14;395(10227):871–7.
- 811 33. Frank C, Lachmann R, Wilking H, Stark K. Increase in dengue fever in travellers  
812 returning from Egypt, Germany 2023. *Eurosurveillance.* 2024 Feb 1;29(5):2400042.
- 813 34. Barik P, Goswami P. Quantifying the Impact of Rainfall Categories on Dengue  
814 Occurrence: A Multi-Site Analysis in India. 2023;
- 815 35. Mutheneni SR, Morse AP, Caminade C, Upadhyayula SM. Dengue burden in India:  
816 recent trends and importance of climatic parameters. *Emerg Microbes Infect.* 2017  
817 Aug;6(8):e70.
- 818 36. Shil P. Rainfall and dengue occurrences in India during 2010–2016. *Biomed Res J.*  
819 2019;6(2):56.
- 820 37. Gardner LM, Fajardo D, Waller ST, Wang O, Sarkar S. A Predictive Spatial Model to  
821 Quantify the Risk of Air-Travel-Associated Dengue Importation into the United States  
822 and Europe. *J Trop Med.* 2012 Mar 14;2012:e103679.
- 823 38. Huang YM. Contributions to the mosquito fauna of Southeast Asia. XIV. The  
824 subgenus *Stegomyia* of *Aedes* in Southeast Asia I-The scutellaris group of species. 1972;
- 825 39. Semenza JC, Sudre B, Miniota J, Rossi M, Hu W, Kossowsky D, et al. International  
826 dispersal of dengue through air travel: importation risk for Europe. *PLoS Negl Trop Dis.*  
827 2014;8(12):e3278.
- 828 40. Tatem AJ, Rogers DJ, Hay SI. Global transport networks and infectious disease

- 829 spread. *Adv Parasitol.* 2006;62:293–343.
- 830 41. Alfsnes K, Eldholm V, Gaunt MW, de Lamballerie X, Gould EA, Pettersson JHO.
- 831 Tracing and tracking the emergence, epidemiology and dispersal of dengue virus to
- 832 Africa during the 20th century. *One Health.* 2021;13:100337.
- 833 42. Cattarino L, Rodriguez-Barraquer I, Imai N, Cummings DA, Ferguson NM. Mapping
- 834 global variation in dengue transmission intensity. *Sci Transl Med.*
- 835 2020;12(528):eaax4144.
