# Supplementary material for: Assessing Dengue Virus Importation Risks in Africa: A Climate and Travel-Based Model
Source: PubMed Central journal article supplement — medRxiv. 2024 Oct 29:2024.05.07.24306997. Preprint. [Version 2] doi: 10.1101/2024.05.07.24306997 (PMC11581072; doi:10.1101/2024.05.07.24306997), 2024-10-29
Supplement: media-1.pdf [file media-1.pdf]

# Supplementary Appendix

Figure S1

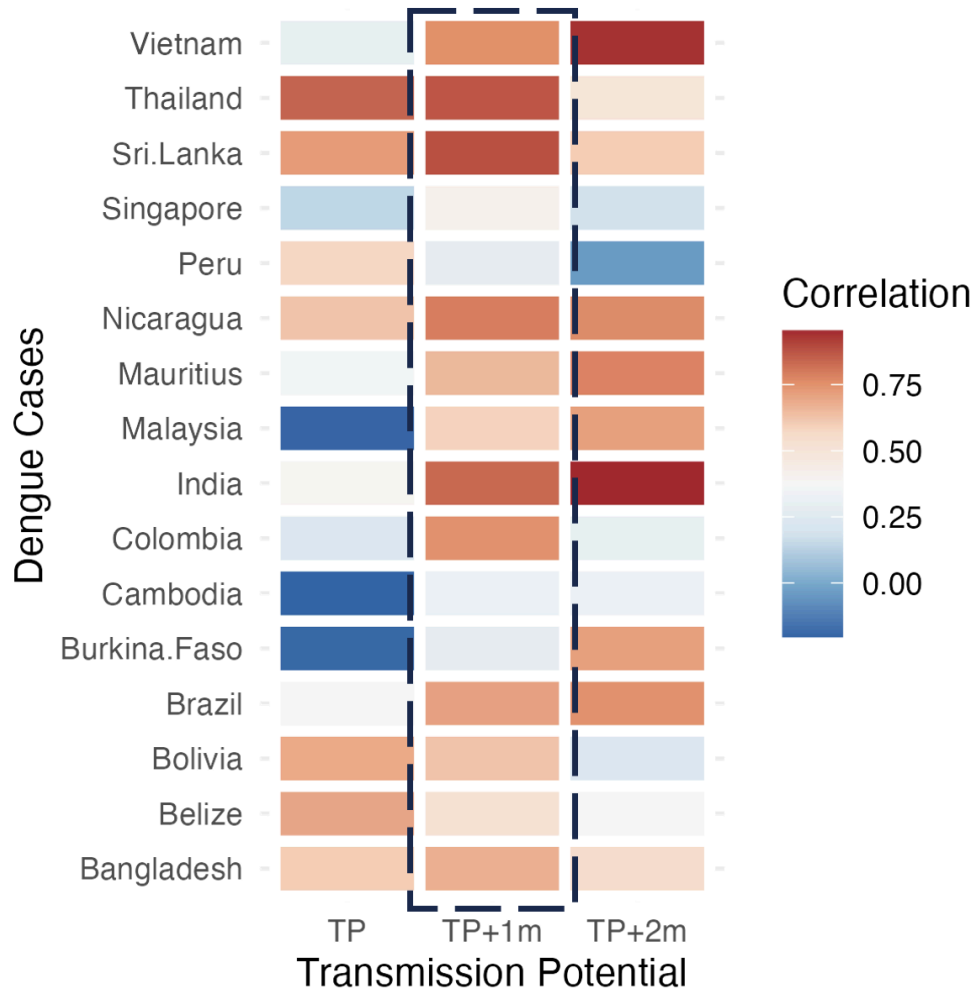

Figure S1: Temporal correlation between monthly dengue cases from different origin countries to Transmission potential without and with 1 and 2 months lag (p-values ranging from 0.001 to 0.65).

Figure S2

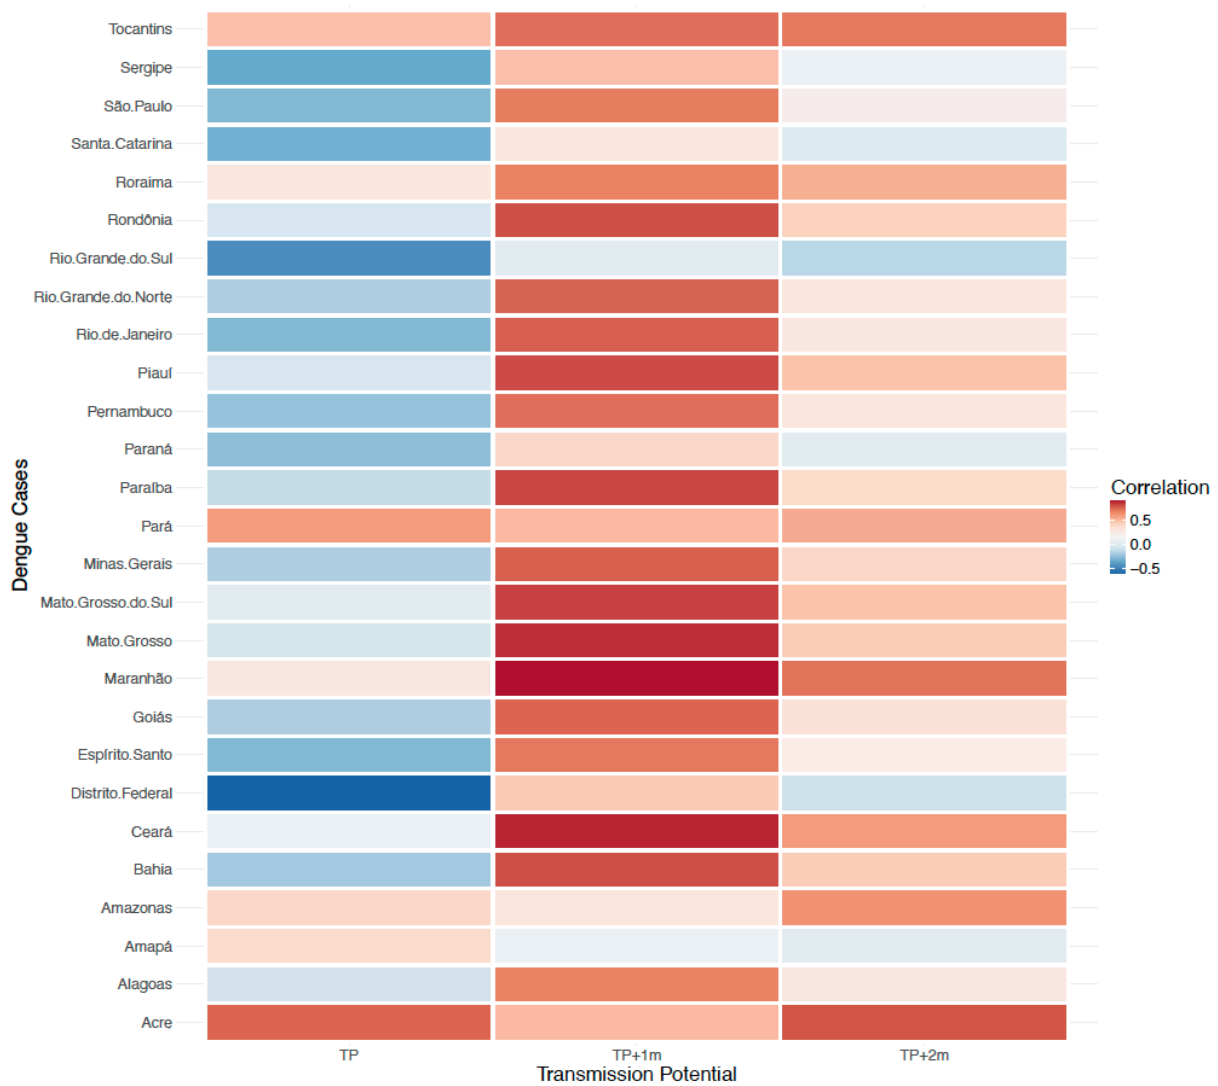

Figure S2: Temporal correlation between monthly dengue cases from different states in Brazil to Transmission suitability without and with 1 and 2 months lag. The p-values for the correlations ranged from 0.0000103 to 0.671.

Figure S3

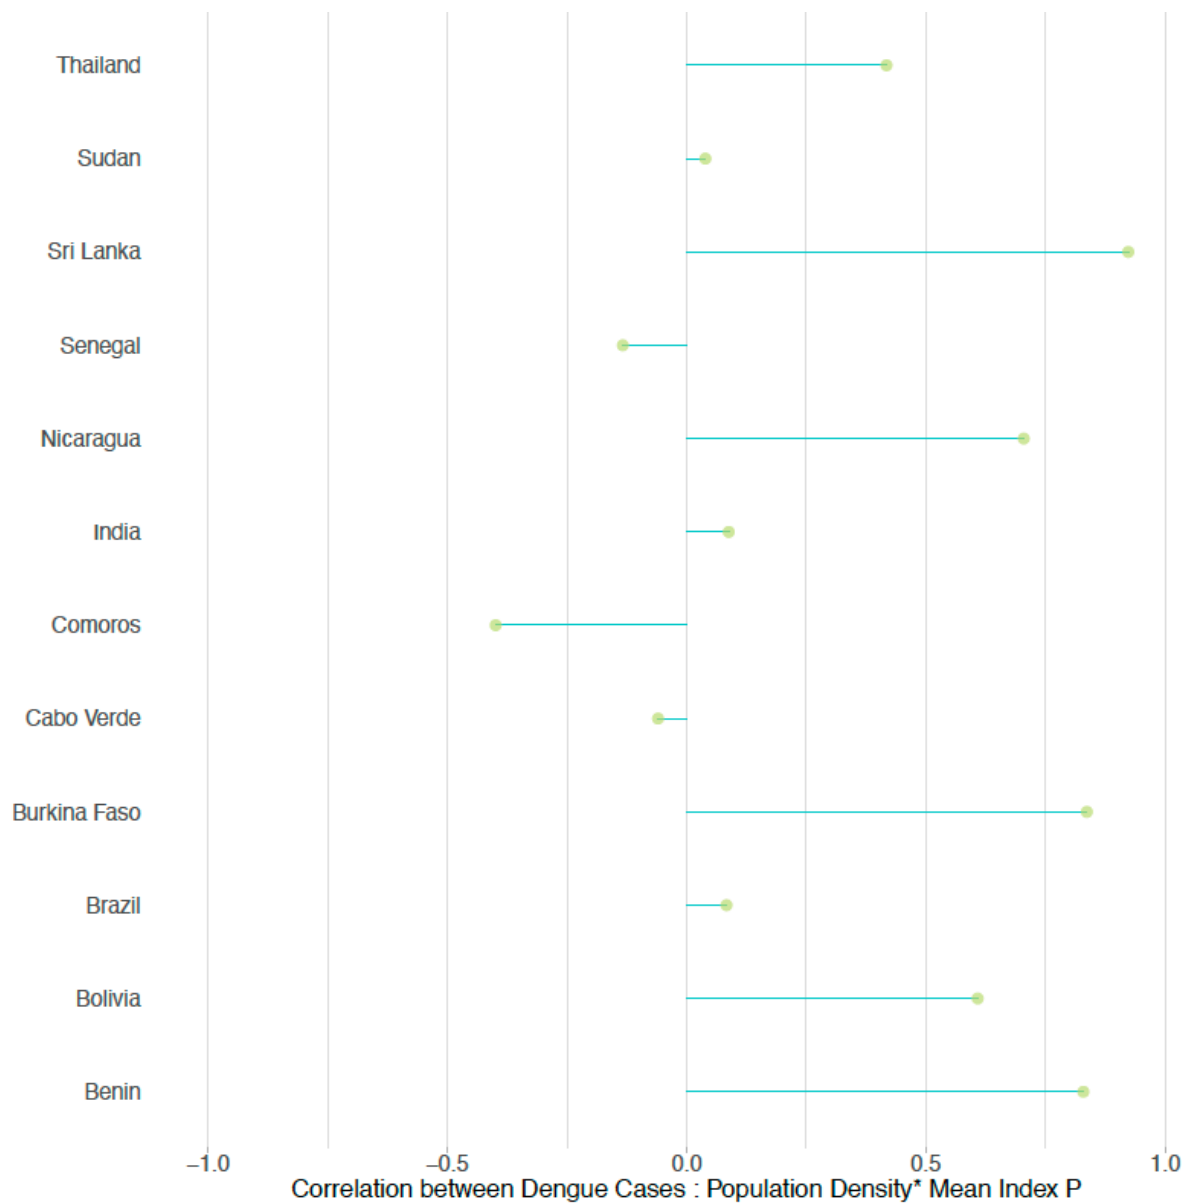

Figure S3: Correlation between Dengue Cases and Population Density multiplied by Mean Index P: This plot illustrates the relationship between the number of dengue cases and the interaction of population density with the mean transmission potential (index P).

Figure S4

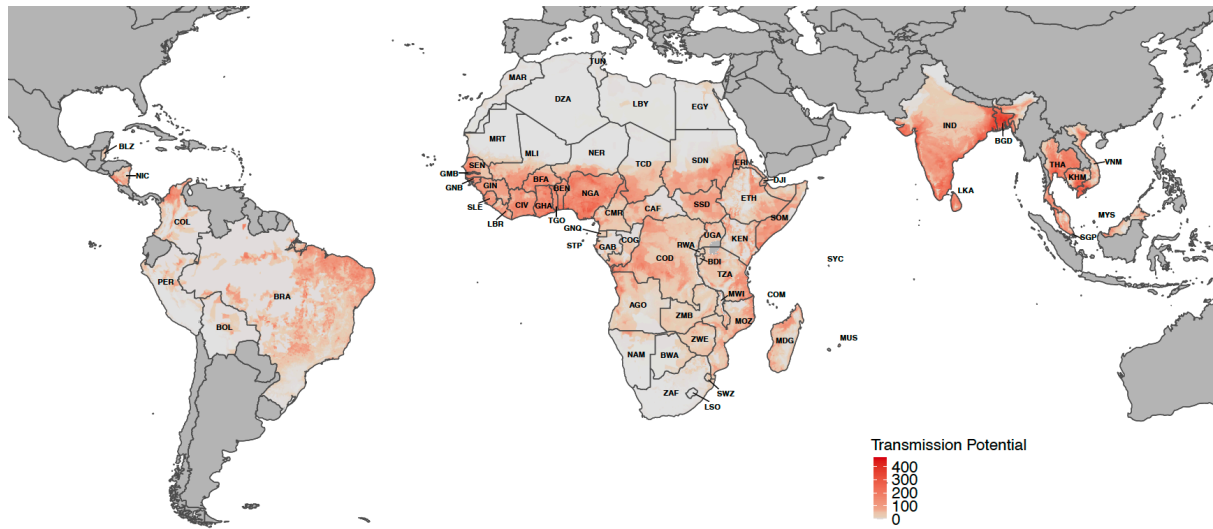

Figure S4: The figure shows the composite index of transmission suitability multiplied by Population Density ( $t_i$ ), used in this study. Here we only show for the 14 countries of high incidence and the African continent, i.e., only for the origin and destination countries used in this study.

Figure S5

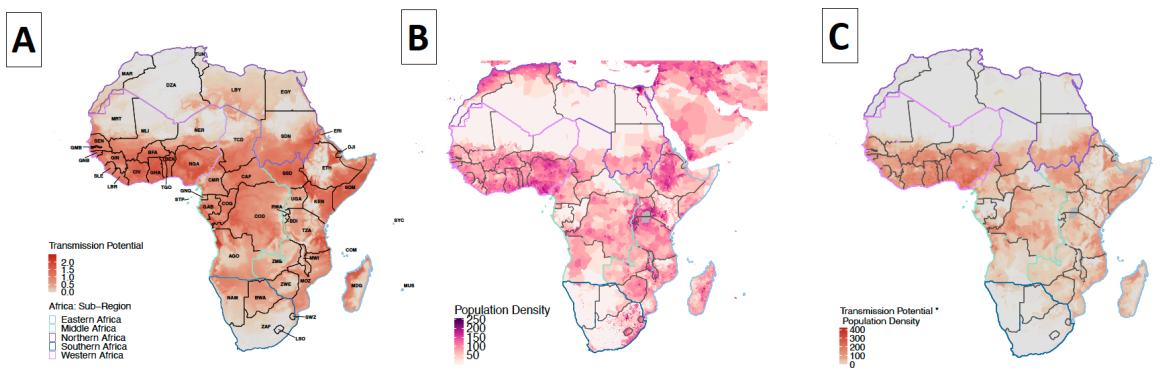

Figure S5: A) The map background uniformly represents the transmission suitability of dengue (mean index  $P$ ) across Africa, with the continent divided into five distinct regions. B) The population density across Africa and C) Transmission suitability multiplied by population density for Africa. We also divide the African continent into 5 regions: Eastern (light blue) , Middle (Green), Northern (Purple), Southern (dark blue) and Western Africa (pink) which are outlined on the map.

# Figure S6

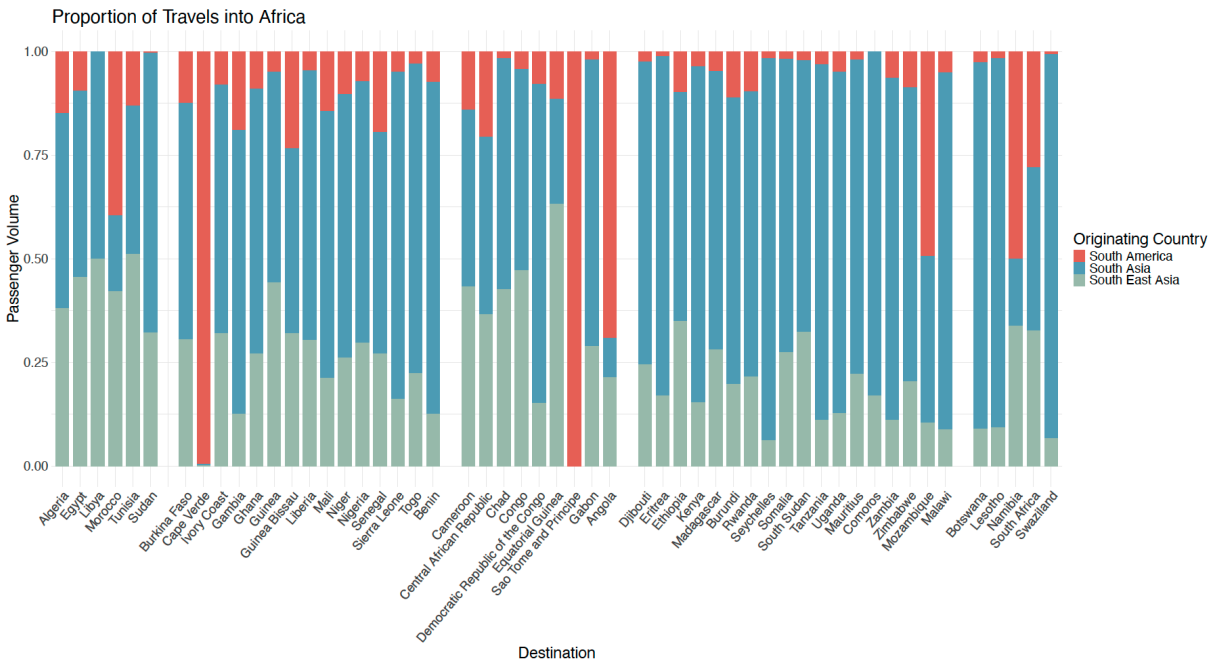

Figure S6: This figure depicts the proportion of travel volumes from Asia, Southeast Asia, and South America to African countries over the course of one year.

Figure S7

A

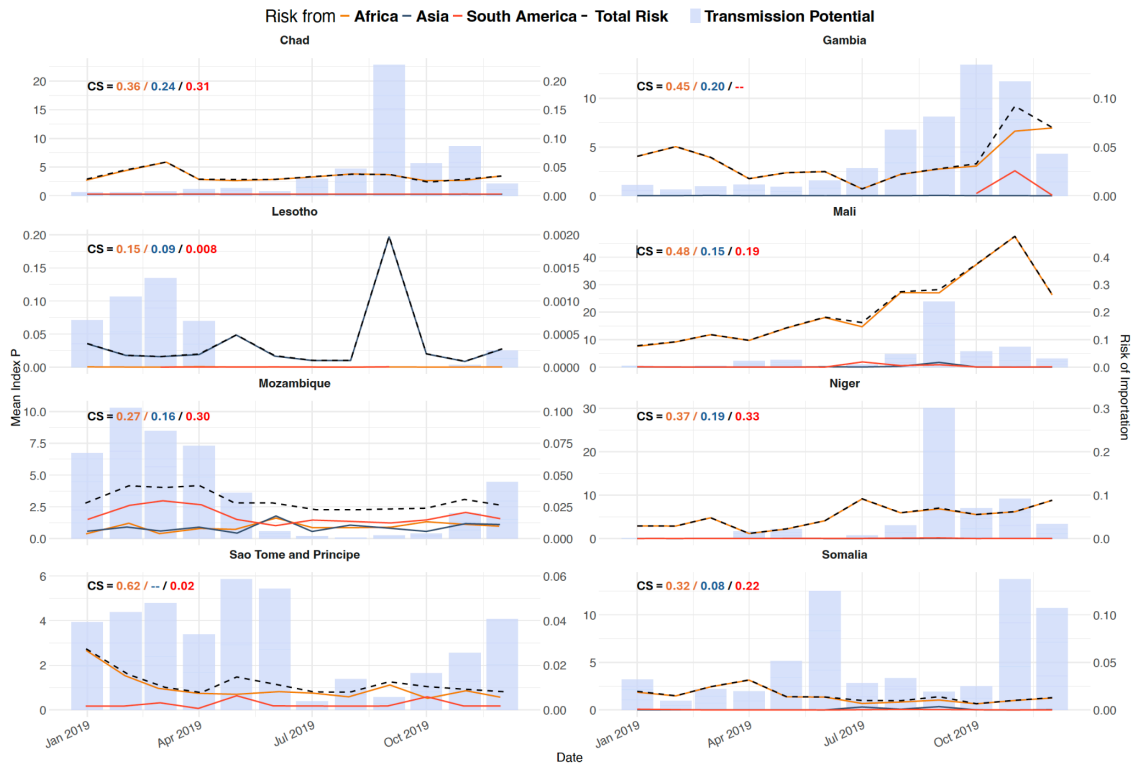

B

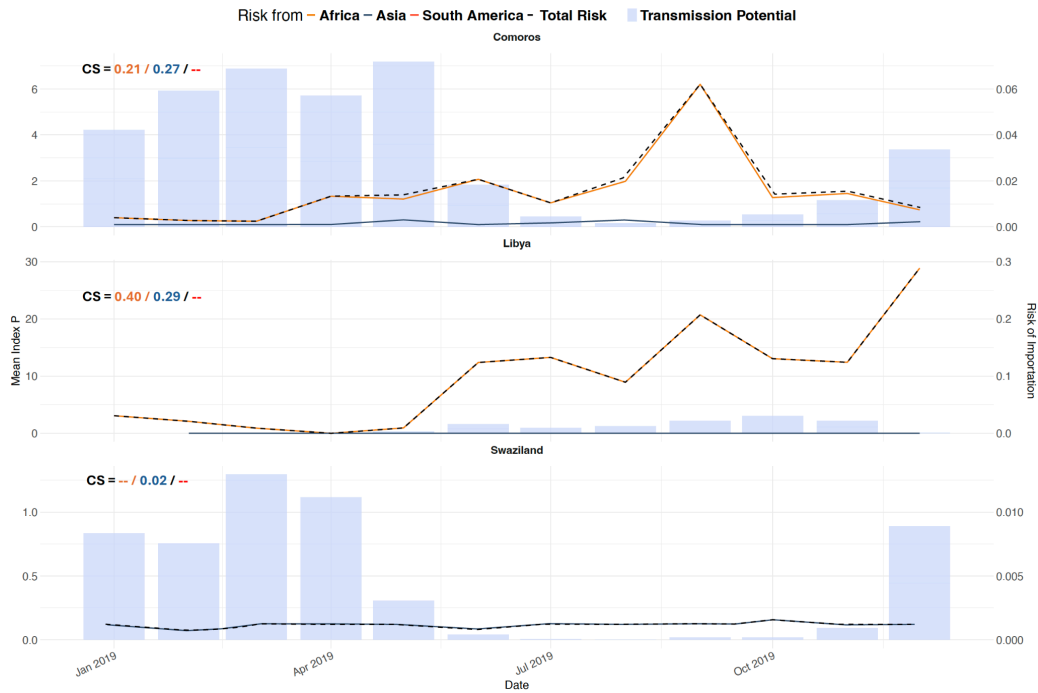

C

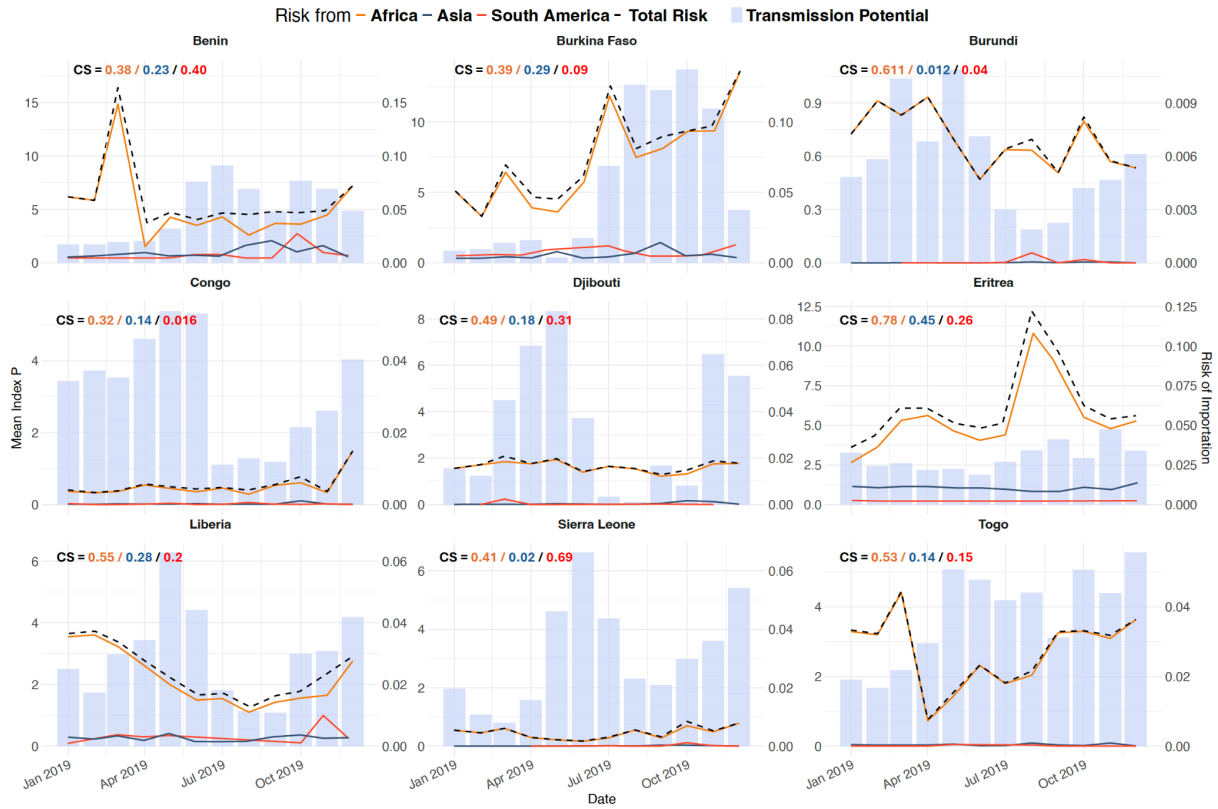

D

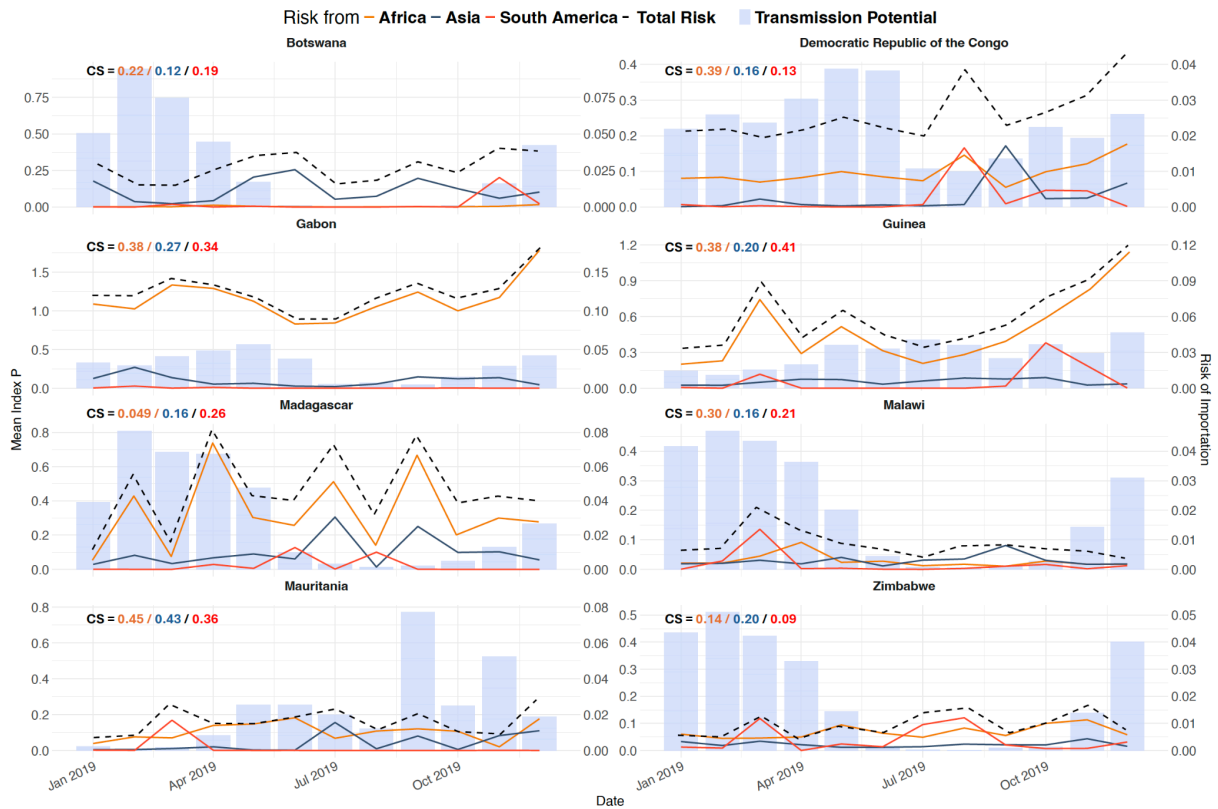

# E

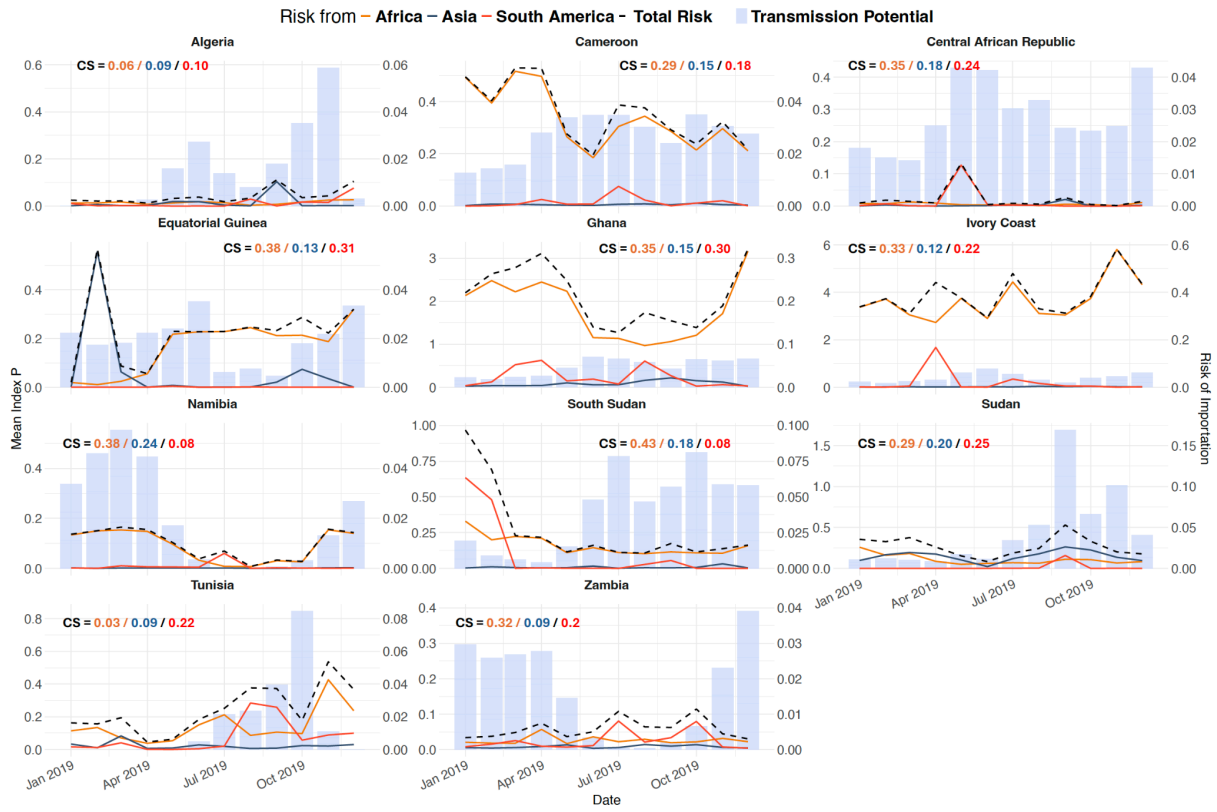

Figure S7: Time-varying risk of introduction into African countries in 2019 from Asia (blue line) and South America (red line) along with time-varying transmission suitability index nationally. The combined risk is represented by the black dotted line. Panel A) Chad, Gambia, Lesotho, Mali, Mozambique, Niger, Sao Tome and Principe, Somalia. B) Comoros, Libya, Swaziland. C) Benin, Burkina Faso, Burundi, Congo, Djibouti, Eritrea, Guinea Bissau, Liberia, Sierra Leone. D) Botswana, DRC, Gabon, Guinea, Madagascar, Malawi, Mauritania, Zimbabwe. E) Algeria, Cameroon, Central African Republic, EquatorialGuinea, Ghana, Ivory Coast, Namibia, South Sudan, Sudan and Tunisia.



Figure S8

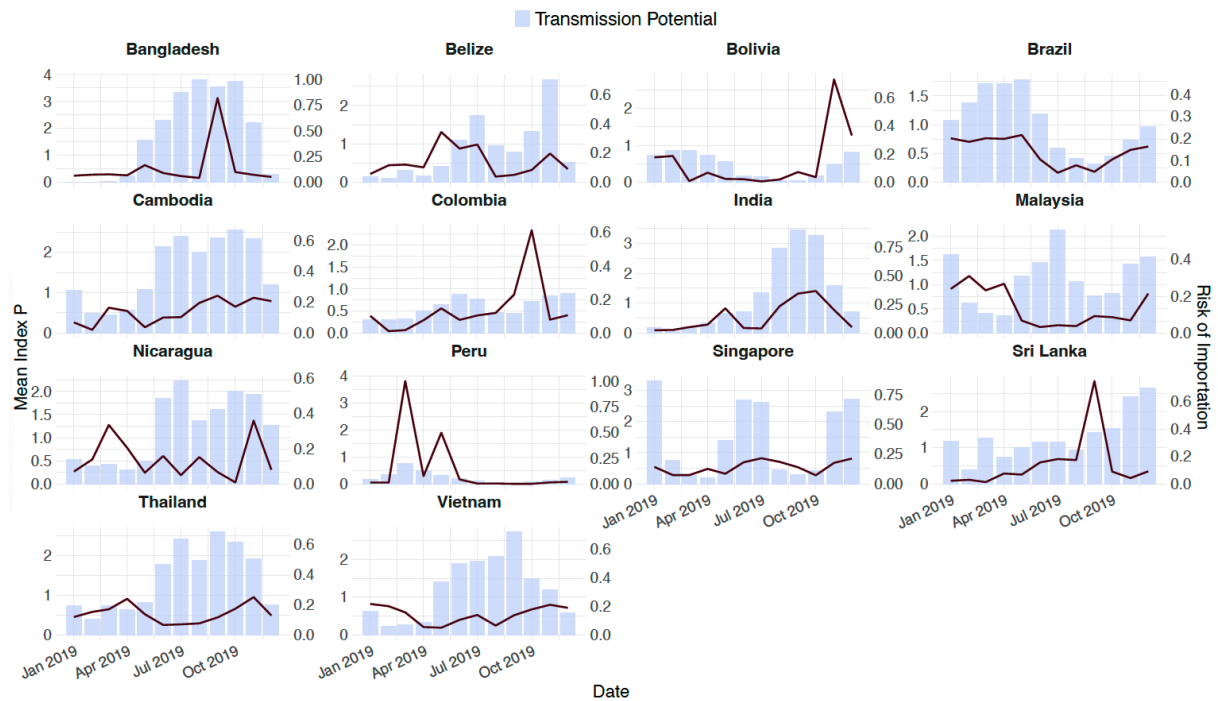

Figure S8: Risk of Exportation from countries of high incidence (n=14) considered in this study overlaid across their respective transmission suitability across the year.

**Table S1**

Table S1: Annual risk of dengue importation into various countries and the cosine similarity between the risk of importation and the local transmission suitability. The cosine similarity values highlight the level of synchrony between the timing of importation risk and transmission suitability.

| Destination Country              | Africa           |                   | Asia             |                   | South America    |                   |
|----------------------------------|------------------|-------------------|------------------|-------------------|------------------|-------------------|
|                                  | Mean Annual Risk | Cosine Similarity | Mean Annual Risk | Cosine Similarity | Mean Annual Risk | Cosine Similarity |
| Algeria                          | 8.58793E-05      | 0.058328731       | 4.75473E-05      | 0.092625456       | 0.000128602      | 0.099100722       |
| Angola                           | 0.000871512      | 0.190891518       | 0.001993496      | 0.452737102       | 0.000366653      | 0.274175799       |
| Benin                            | 0.003930211      | 0.389007711       | 3.47791E-06      | 0.228437938       | 1.68932E-06      | 0.396225317       |
| Botswana                         | 3.51387E-05      | 0.215154412       | 2.13379E-05      | 0.117967166       | 2.78784E-05      | 0.194705357       |
| Burkina Faso                     | 0.006646177      | 0.385177331       | 4.09467E-06      | 0.286753612       | 1.88572E-06      | 0.087784552       |
| Burundi                          | 0.000837797      | 0.611547737       | 2.34401E-06      | 0.011767048       | 1.54542E-07      | 0.642582104       |
| Cameroon                         | 0.008447926      | 0.295619467       | 2.95063E-05      | 0.153247624       | 2.19541E-05      | 0.181770533       |
| Central African Republic         | 0.000218083      | 0.353990993       | 3.91664E-05      | 0.177757447       | 9.86087E-06      | 0.23872773        |
| Chad                             | 0.000274719      | 0.369497313       | 1.53444E-06      | 0.238037186       | 2.49248E-08      | 0.316180995       |
| Comoros                          | 0.001294683      | 0.209741644       | 4.3464E-07       | 0.27279957        | -                | -                 |
| Congo                            | 0.000586055      | 0.324397585       | 4.35204E-06      | 0.14248563        | 1.69903E-05      | 0.016785495       |
| Democratic Republic of the Congo | 0.001303986      | 0.393800624       | 8.2923E-06       | 0.162595074       | 7.14804E-06      | 0.132166652       |
| Djibouti                         | 0.001532898      | 0.494685428       | 7.89399E-06      | 0.187134913       | 3.04414E-08      | 0.316606702       |
| Egypt                            | 0.000936993      | 0.099743346       | 0.001444715      | 0.310977716       | 0.003022812      | 0.146581553       |
| Equatorial Guinea                | 0.001953211      | 0.381572116       | 0.00014837       | 0.130329526       | 4.96267E-06      | 0.316211807       |
| Eritrea                          | 0.008478351      | 0.777500496       | 9.86055E-07      | 0.4451418         | 3.4245E-08       | 0.26141747        |
| Ethiopia                         | 0.005274767      | 0.150157274       | 0.000581153      | 0.00676671        | 0.000591047      | 0.194017404       |
| Gabon                            | 0.007230396      | 0.375102928       | 8.65829E-06      | 0.27379809        | 4.1067E-06       | 0.336726972       |
| Gambia                           | 0.003186559      | 0.458145605       | 8.03388E-06      | 0.201716686       | 0.005653556      | -                 |
| Ghana                            | 0.00955636       | 0.351897748       | 0.000170407      | 0.150931437       | 5.47708E-05      | 0.295709752       |
| Guinea                           | 0.003630093      | 0.383805206       | 1.21755E-05      | 0.19985256        | 1.44646E-07      | 0.407950221       |
| Guinea-Bissau                    | 0.001072629      | 0.457622528       | -                | -                 | -                | -                 |
| Ivory Coast                      | 0.020974173      | 0.325717678       | 6.57972E-05      | 0.12354295        | 0.00107263       | 0.215319706       |

|                       |             |             |             |             |             |             |
|-----------------------|-------------|-------------|-------------|-------------|-------------|-------------|
| Kenya                 | 0.005731245 | 0.036114895 | 0.000988367 | 0.069622909 | 0.001494575 | 0.154600402 |
| Lesotho               | 3.56208E-07 | 0.15289133  | 1.02055E-05 | 0.094732527 | 3.14016E-07 | 0.0085123   |
| Liberia               | 0.002223941 | 0.552593253 | 3.04256E-06 | 0.280318149 | 9.93E-08    | 0.24756365  |
| Libya                 | 0.015078074 | 0.398317605 | 2.5673E-07  | 0.299733067 | -           | -           |
| Madagascar            | 0.002337154 | 0.049387505 | 2.94347E-05 | 0.168038552 | 4.71908E-07 | 0.260730525 |
| Malawi                | 0.000321708 | 0.300413857 | 5.119E-06   | 0.158354803 | 1.16176E-06 | 0.211343472 |
| Mali                  | 0.015824618 | 0.480114221 | 3.1599E-05  | 0.151662472 | 2.32159E-06 | 0.191559015 |
| Mauritania            | 0.001212314 | 0.455332323 | 1.61734E-05 | 0.438664787 | 6.37599E-07 | 0.364489628 |
| Mauritius             | 9.70938E-05 | 0.130737683 | 0.001849354 | 0.437307709 | 5.49418E-05 | 0.183208942 |
| Morocco               | 0.003680877 | 0.032089383 | 0.000168915 | 0.062747594 | 0.001201956 | 0.08396825  |
| Mozambique            | 8.16851E-05 | 0.265098023 | 1.54534E-05 | 0.158473509 | 2.75049E-05 | 0.302516564 |
| Namibia               | 0.001218896 | 0.379170333 | 4.50418E-06 | 0.243176458 | 2.5075E-05  | 0.084827259 |
| Niger                 | 0.006007527 | 0.373429595 | 8.00839E-06 | 0.196077917 | 2.6152E-08  | 0.332386386 |
| Nigeria               | 0.002684687 | 0.175464736 | 0.000385632 | 0.129285607 | 0.003900263 | 0.166146102 |
| Rwanda                | 0.001544029 | 0.534617381 | 7.87532E-05 | 0.082448877 | 7.02317E-06 | 0.178981757 |
| Sao Tome and Principe | 0.000170228 | 0.616702222 | -           | -           | 1.15721E-05 | 0.02254764  |
| Senegal               | 0.022102646 | 0.354560297 | 2.50289E-05 | 0.078299913 | 0.00144425  | 0.090820404 |
| Sierra Leone          | 0.000356306 | 0.414192321 | 4.02423E-06 | 0.020192397 | 1.28825E-08 | 0.690094408 |
| Somalia               | 0.001317879 | 0.315245767 | 1.73787E-05 | 0.082469611 | 3.80101E-05 | 0.21881435  |
| South Africa          | 0.005954194 | 0.123350931 | 0.001192238 | 0.102518352 | 0.003235918 | 0.100622363 |
| South Sudan           | 0.001536735 | 0.43148707  | 1.00949E-05 | 0.183587161 | 0.001606043 | 0.081165463 |
| Sudan                 | 0.001331234 | 0.292155652 | 0.000214187 | 0.196758845 | 0.000140615 | 0.248052223 |
| Swaziland             | 0           | -           | 5.24909E-07 | 0.024587963 | 1.42E-08    | -           |
| Tanzania              | 0.004724326 | 0.252885566 | 6.78168E-05 | 0.121105075 | 3.23203E-05 | 0.161858017 |
| Togo                  | 0.002531176 | 0.526981151 | 4.93146E-06 | 0.141542277 | 5.21319E-06 | 0.274707511 |
| Tunisia               | 0.00353866  | 0.030401063 | 9.32356E-05 | 0.085759411 | 0.00045281  | 0.223887708 |
| Uganda                | 0.006595113 | 0.294246386 | 0.00036009  | 0.174638736 | 0.00022749  | 0.139245862 |
| Zambia                | 0.000214647 | 0.324477152 | 3.77893E-05 | 0.088560608 | 1.53366E-05 | 0.200134605 |
| Zimbabwe              | 0.00058781  | 0.146458059 | 1.07493E-05 | 0.201679279 | 1.38175E-05 | 0.094483847 |
